# Supplementary material for: Motor thalamus supports striatum-driven reinforcement
Source: eLife. 2018 Oct 8;7:e34032. doi: 10.7554/eLife.34032 (PMC6181560; doi:10.7554/eLife.34032)
Supplement: Figure 1—figure supplement 2—source data 1. [file elife-34032-fig1-figsupp2-data1.xlsx]

## Sheet: Figure 1 - figure supplement 2
a										b							c										d					e						Figure 1f
	Poke rate				Total laser						Poke rate							Poke rate				Total laser					mouse	train	degrad	train		mouse	constant	10Hz	20Hz	40Hz		distance (m)
mouse	0.5	1	3	5	0.5	1	3	5		mouse	10Hz	20Hz	30Hz	40Hz	constant		mouse	FR1	FR2	FR3	FR5	FR1	FR2	FR3	FR5		1	115	104	202		1	2.3	4.1	9	23.9667		ChR2	eYFP
1		9.67		2.77		9.67		13.83		1	3.1	4.3	14.4	13.7	10.2		1	14.83	8.53	9.3	0.5	14.83	4.27	3.1	0.1		2	181	51	85		2	0.6	0.5	0.6	11.4778		3.23871	4.22
2		13.6	4.4	1.73		13.6	13.2	8.67		2	1.3	2.6	6.5	11.2	10.5		2	8.97	5.93	5.5	0.5	8.97	2.97	1.83	0.1		3	317	124	258		3	2.4	1.4	4.2	17.8667		3.44293	2.82
3		8.03	4.77	3.57		8.03	14.3	17.83		3	2	4.7	8.3	13.7	14.9		3	7.87	4.4	5.3	3.17	7.87	2.2	1.77	0.63		4	100	70	174		4	1.2	2	4.7	17.7		2.55322	3.09
4		5.13	2.3	1.83		5.13	6.9	9.17		4	1.8	7.4	6.6	13.4	12.8		4	13.3	10.4	7.5	4.33	13.3	5.2	2.5	0.87		5	400	338	402								2.36961	3.41
5		7.67		2.93		7.67		14.67																			6	277	237	310								3.24058	3.42
6		9.63		1.8		9.63		9																			7	399	331	439								2.58436	3.72
7		12.6		0.7		12.6		3.5																			8	269	149	177								2.33071	3.32
8		12.33		2.5		12.33		12.5																														2.48737	1.8
9		12.43		4.43		12.43		22.17																														3.10618
10		8.23		3.87		8.23		19.33
11		13.2		3.6		13.2		18
12		11.4		3.87		11.4		19.33
13		13.47		2.83		13.47		14.17
14	13	12.7	6.6	5.44	6.5	12.7	19.8	27.2
15	7.7	9.44	7.89	4.89	3.85	9.44	23.67	24.45
16	13.3	11.7	6.8	6	6.65	11.7	20.4	30
17	8.14	13.71	4.5	5.1	4.07	13.71	13.5	25.5
