# Supplementary material for: Motor thalamus supports striatum-driven reinforcement
Source: eLife. 2018 Oct 8;7:e34032. doi: 10.7554/eLife.34032 (PMC6181560; doi:10.7554/eLife.34032)
Supplement: Figure 1—figure supplement 3—source data 1. [file elife-34032-fig1-figsupp3-data1.xlsx]

## Sheet: Figure 1 -figure supplement 3
a						b
Poking bursts						pokes/burst
	ipi < 2s		ipi < 6s				ipi < 2s		ipi < 6s
mouse	day1	day4	day1	day4		mouse	day1	day4	day1	day4
1	39	35	13	48		1	3.103	6.857	2.077	5.063
2	18	40	0	25		2	2.611	5.75	0	2.8
3	26	32	47	39		3	2.769	6.688	2.809	11.795
4	39	38	21	31		4	2.615	6.789	2.381	5.484
5	34	43	34	42		5	2.853	5.581	3.118	5.238
6	58	42	22	63		6	4.586	8.595	2.227	6.206
7	22	35	36	38		7	2.909	5.371	3.111	5.974
8	10	28	17	36		8	2.1	3.607	2.176	3.194
