# Supplementary material for: Motor thalamus supports striatum-driven reinforcement
Source: eLife. 2018 Oct 8;7:e34032. doi: 10.7554/eLife.34032 (PMC6181560; doi:10.7554/eLife.34032)
Supplement: Figure 1—source data 1. [file elife-34032-fig1-data1.xlsx]

## Sheet: Figure1
Figure 1c					Figure 1d					Figure 1e										Figure 1f																			Figure 1g										Figure 1h
time (min)	ChR2 a	eYFP a			ChR2		eYFP				mouse									Inter Poke Intervals - active nosepoke																				mouse									time (min)
1	0	0		mouse	a	i	a	i		day	1	2	3	4	5	6	7	8		day1										day4										ChR2									1
2	0	0		1	230	16	5	6		1	284	288	276	307	310	414	241	180		mouse	1	2	3	4	5	6	7	8		1	2	3	4	5	6	7	8		poke	1	2	3	4	5	6	7	8		2
3	2	2		2	54	16	17	41		2	304	237	331	297	227	415	187	91		average (Figure 1f right)	1.91116	3.81504	4.48813	2.28919	3.1246	1.92126	4.19069	5.00624		4.271	8.80338	2.2605	5.17939	4.58322	2.7536	4.81136	7.54079		a	24	24	27	11	33	25	16	28		3
4	24	3		3	436	38	12	4		3	386	200	310	381	232	447	255	164																					i	2	5	12	5	10	3	5	2		4
5	34	4		4	320	1	24	23		4	332	183	506	228	290	471	292	204		individual raw values (s)	13.6	48.832	0.8	3.067	0.866	5.2	23.066	3.867		0.066	0.466	4.966	11.633	13.4	2.667	0.933	0.9			eYFP									5
6	49	7		5	464	8	7	18												(Fig 1f left)	0.6	1.634	1.267	0.433	1.1	9.3	3.967	0.433		0.633	5.634	0.367	13.166	0.667	1.533	1.267	11.733		poke	1	2	3	4	5	6	7	8		6
7	64	9		6	373	21	5	15													0.766	0.366	0.733	1.067	2.4	2.866	1	3.1		1.033	15.233	1.033	28.533	0.8	1.167	0.7	0.567		a	6	5	7	4	11	8	6	1		7
8	71	9		7	318	19	4	11													1.1	2.167	0.734	1.066	1.7	38.133	0.1	0.267		1.1	0.733	0.067	1.1	4.933	1.333	9.567	1.067		i	7	8	1	4	18	16	5	5		8
9	92	9		8	247	15	14	84													0.934	5.067	0.466	0.467	0.9	1.7	2.1	2.367		1.067	3.867	0.133	4.234	0.533	1.167	1.2	0.533												9
10	109	9		9	404	12															0.833	0.566	0.3	1.366	0.7	1.766	1.633	18.566		0.933	20.1	0.467	3.1	1.934	0.933	1.233	4.233												10
11	116	9																			0.9	2.1	0.834	0.4	0.867	5.734	1.434	0.1		1.5	6.266	0.1	0.633	1.533	0.734	7.2	1												11
12	129	9																			0.7	1.934	1.4	0.967	0.733	1.133	1.233	1.767		0.733	75.033	0.7	2.3	6.066	0.633	0.733	7.867												12
13	136	10																			1.634	2.166	0.333	1.133	1.1	0.933	0.467	19.733		1.1	0.433	0.633	0.6	0.567	9.866	9.067	0.566												13
14	147	10																			0.166	1.233	3	1.034	1.967	1.067	0.4	3.667		1	5.233	0.667	0.067	7.433	0.8	0.866	3.5												14
15	162	11																			0.267	1.734	0.5	11.066	1.033	19.167	1.666	0.066		1.667	19.633	0.166	1.066	0.8	0.567	0.667	3.234												15
16	174	11																			0.9	4.566	0.3	1.034	1.233	4.366	3.567	2.9		2.767	3.434	0.967	16.467	0.6	0.067	1.7	17.133												16
17	186	12																			0.1	1.567	1.6	1.133	3.534	0.967	1	0.567		1.5	0.1	2.967	1.633	0.967	0.5	1.3	1												17
18	200	13																			1.067	1.434	0.533	0.9	0.833	1.8	3.466	3.2		1.067	4.233	0.5	0.7	3.933	3.233	1.033	0.7												18
19	216	14																			4.166	2	0.334	1.067	0.567	1.033	1.8	0.5		21.466	8	0.133	0.567	0.467	0.633	0.1	1.833												19
20	226	15																			4.267	1.733	0.466	2.599	3.233	2.4	0.3	6.733		1.267	27.466	1.133	6.466	0.767	2.7	0.7	31.233												20
21	239	15																			1.066	0.467	0.1	2.667	3	1.633	0.834	2.5		1.266	22.333	1.5	22.066	4.133	0.6	1.766	20.4												21
22	239	18																			1.2	1.533	2.033	3.2	0.733	1.1	0.3	3.733		1.3	0.734	0.967	0.667	0.833	0.467	17.2	1.466												22
23	252	18																			0.567	1.567	1.834	1.7	0.7	1	0.3	1.433		1.1	6.033	0.367	12.1	38.8	9.333	1.8	22.6												23
24	270	20																			1.3	0.466	0.3	0.467	0.567	0.9	2.167	1.7		1.2	3.867	0.866	1.633	0.633	1.4	13.8	1.134												24
25	281	21																			5.667	1.1	2.5	3.8	0.4	1.434	0.266	1.9		10.6	6.566	0.967	1.567	11.433	1.1	24.133	2.566												25
26	286	21																			0.966	0.634	0.466	5.433	16.266	0.7	2.867	4.5		1.267	7.4	1.2	4.633	10.033	1.134	16.033	13.367												26
27	298	23																			0.967	2.066	6.034	1.633	5.5	1.066	1.3	0.067		2.033	1.733	1.2	0.634	2.6	0.966	15.5	17.233												27
28	308	23																			1.033	8.433	0.633	13.467	0.6	8.567	4	22.633		1.634	6.634	0.433	2.399	2.067	2.667	1.4	0.8												28
29	320	24																			1.166	0.967	3.133	1.6	0.434	0.833	1.967	0.367		1.299	2.366	0.9	0.867	27.799	6.767	0.8	2.3												29
30	320	24																			2.7	0.266	4.167	0.833	0.566	0.534	2.633	15.299		1.2	13.434	0.167	1.433	25.367	4.833	0.8	3.633												30
																					1.867	0.234	4.3	0.967	0.534	0.566	1.2	1.634		2.434	3.866	0.933	0.8	0.4	1.066	2.333	1.433
																					0.933	2.1	0.266	0.867	0.8	0.534	0.3	4.066		0.466	94.199	1.267	65.133	0.666	1.3	0.733	2.367
																					0.634	1.1	0.867	1.833	0.5	1.033	1.1	2.834		1.3	0.7	0.3	1.1	0.867	1.167	0.467	2.333
																					2.766	1.4	4.1	46.333	13.733	0.766	2.634	8.6		1.4	5.7	0.933	0.866	1.233	0.9	0.433	10.967
																					3.1	4.866	0.1	0.6	0.9	1.067	1.766	0.2		1.567	1.4	1.367	21.134	0.867	1.033	0.734	0.966
																					1.1	20.767	0.1	0.533	1.033	0.533	23.767	0.433		1.067	6.233	1.233	12.099	0.067	2.934	0.1	16
																					3.934	1	30.133	0.734	1.467	1.367	2.033	13.8		4.066	29.033	1.533	0.767	0.733	0.9	20.899	1.167
																					1.433	1.233	0.134	1.533	0.466	0.4	2.5	0.2		4.167	0.934	1.233	1.3	9.833	1.433	2.5	38.666
																					2.467	0.467	0.133	3.467	3.5	10.967	1.267	1.733		1.3	10.933	0.367	6.533	12.6	2.933	11.867	19.533
																					0.333	1.133	0.433	1.166	5.233	0.533	1.466	0.467		1.167	5.033	0.1	0.567	1.033	1.467	16.2	1.3
																					5.567	0.433	0.2	1.4	2.066	0.533	2.234	2.133		1.133	21.567	0.933	3.267	2.4	1.833	1.466	0.534
																					2.266	1.6	0.967	8.6	5.7	0.6	3.666	2.9		1.5	68.266	1.067	1.166	22.767	0.734	8.834	1.166
																					0.733	2	10	0.834	0.4	0.534	1.3	0.833		2.4	6.633	1	4.1	1.267	4.466	1.233	7.8
																					2.7	1.8	0.633	0.7	0.7	4.366	83.599	14.133		1.233	4.166	5.7	0.633	1.433	1.133	0.4	1.667
																					1.9	0.5	0.167	1.1	0.433	2.367	1.467	0.067		13.567	1.4	0.067	41.3	1.133	0.967	1.3	13.766
																					0.7	2.8	1.933	6.166	0.433	0.866	1	2.067		0.8	8.567	1.233	1.133	38.133	9.3	0.4	0.934
																					0.7	1.1	8.867	0.367	1.1	0.2	6.2	6.1		0.866	1.067	0.167	2.267	3.967	1.033	4.367	0.533
																					1.033	35.466	0.066	0.133	0.367	0.9	3.167	1.733		2.434	42.466	1.3	53.999	4.3	1.234	37.833	1.133
																					0.967	1.8	0.567	2.567	2.133	0.567	15.899	6.834		2.033	0.933	35.366	11.1	1.166	1	15.299	10.3
																					0.8	1.5	0.333	14.6	0.467	0.667	0.967	11.733		1.933	11.233	0.067	0.7	2.5	5.566	26.3	0.967
																					1.9	0.934	0.167	1.3	0.366	0.7	1.3	1.1		1.4	6.634	0.066	2.3	5.5	1.1	2.033	11.466
																					1.133	0.7	3.6	2.166	0.367	0.933	3.333	0.1		1.433	1.166	0.5	1.267	1.6	1.367	0.434	18.934
																					2.934	1.333	3.266	1.734	24.433	0.7	0.967	1.066		1.467	7.234	0.9	2.733	0.533	2.366	0.466	0.866
																					1.4	3.3	4.034	1.266	0.667	0.833	1.133	2.234		9	9.366	1	0.667	0.1	0.734	18.8	0.5
																					1.433	1.033	11.633	2.034	0.366	0.667	1.4	0.7		0.7	3.9	0.933	2.266	1.367	5.733	1.4	10.033
																					1.267	1.967	0.367	1.4	1.5	1.233	0.8	0.866		0.533	1.833	0.167	0.067	0.1	0.8	2.7	0.8
																					1	2.333	0.333	0.6	0.434	0.634	3.633	1.434		6.6	11.234	0.2	0.667	2.433	0.933	0.5	0.767
																					1.3	0.267	2.133	0.733	2.7	3.467	21.234	2.9		0.734	3.5	0.133	0.7	12.567	8.167	1.6	3.334
																					1.133	0.933	1.533	0.967	0.333	1.766	1.066	2.033		1.366	83.165	0.967	17.633	2.8	1	0.133	1.6
																					1.6	1.067	0.1	1.233	2.067	0.6	2.234	0.367		1.333	0.7	1.433	0.933	0.667	4.033	0.434	12.699
																					1.633	0.9	2.034	3.033	2.233	0.767	0.333	48.866		2.534	14.267	1.334	2.367	0.8	1.067	0.833	0.8
																					1.1	4.266	2.466	1.933	0.2	0.667	1.666	4.833		1.766	42.466	1.666	0.7	0.066	2.533	0.133	0.1
																					1.633	1.234	4.034	1	1.067	0.6	0.834	1.967		1.667	78.366	0.434	12.8	0.667	1.367	20.367	3.034
																					1.2	0.733	1.833	5.434	0.066	0.966	34.199	0.2		71.699	5.833	0.333	7.2	10.1	1.1	3.933	1.4
																					1.033	2.1	0.333	1.233	10	0.667	0.934	6.366		0.7	10.633	0.167	0.766	7.366	0.866	1.333	48.699
																					0.867	0.833	2.934	1.633	1.167	1.033	1.5	8.867		0.967	3.1	0.333	0.667	2.267	4.767	0.5	0.7
																					1.766	8.067	0.3	11.1	0.133	1.833	3.066	0.933		1.167	5.9	1.6	0.433	0.767	3.7	0.134	32.333
																					0.834	0.733	3.033	0.734	2.2	0.934	1.6	1.667		1.266	6.467	3.6	5	1.266	1.733	0.9	1.2
																					0.733	0.567	0.4	1.366	9.933	1.6	1.3	5.3		1.167	4.733	0.667	0.534	3.167	8.167	1.5	2.333
																					3.267	0.166	0.067	1.467	2.134	0.699	0.733	1.8		1.467	1.967	1.133	0.1	0.566	5.933	0.7	1.2
																					0.1	1.767	0.367	1.233	0.666	0.6	2.933	2.666		1.599	10.866	1.666	0.633	1.834	0.833	0.733	4.267
																					2.333	1.033	1.533	2.233	17.8	0.8	70.466	2.367		1.7	0.634	2	3.5	28.499	4.3	0.967	11.067
																					0.1	66.4	1.7	10.467	2.267	0.567	1.034	34.966		1.9	1.766	2.834	66.166	1.667	2.067	0.1	18.966
																					1.067	0.966	4.967	0.7	7.133	1	20.866	4.4		1.734	3.6	0.066	1.266	2.867	6.633	11.033	1.167
																					0.7	0.634	0.233	1.833	0.1	0.633	12.433	5.434		4.566	1.3	0.967	9.5	1.966	1.467	1.467	0.7
																					0.666	0.733	5.633	1.634	1.233	0.467	0.933	43.232		1.367	1.567	1.633	0.9	0.834	1.5	6.3	40.499
																					2.534	2.267	3.567	1.433	1.634	1.567	0.167	27.433		6.3	10.233	1.234	2.334	0.666	2.467	2.066	1.667
																					0.566	3.4	47.033	2.666	0.433	2.966	1.7	7.834		1.467	1.4	0.066	1.833	0.234	0.666	0.6	0.933
																					2.667	0.599	1.566	1.267	0.9	0.567	0.833	13.233		7.699	1.433	1.467	0.567	2.033	14.733	0.4	0.5
																					7.2	2.534	0.434	2.633	2.733	0.5	0.967	1.167		4.834	22.667	0.2	0.633	13.6	1.234	0.7	38.133
																					0.133	4.2	0.9	1.167	9.3	0.6	0.967	16.133		2.166	4.833	0.067	1.267	0.4	1.433	0.067	1.567
																					1.7	5.333	3.933	0.866	1.133	0.567	0.533	2.033		5.567	9.533	0.9	8.267	0.533	1.033	0.567	0.766
																					0.1	1.5	0.1	0.734	1.767	19.333	1.5	1.833		0.9	1.334	1.566	0.133	1.367	6	18.9	53.767
																					3.4	1.467	1.4	1.2	7.066	0.4	1.1	0.1		1.233	6.966	0.3	0.6	6.466	1.134	2.033	1.5
																					0.533	0.966	1.033	1.166	0.9	0.7	0.2	0.667		1.434	0.6	1.334	0.633	0.834	1.066	0.433	0.9
																					1.867	49.166	1.7	2.134	1.434	0.666	25.166	0.4		7.499	4.467	1.333	0.833	0.1	1	2.533	1
																					0.566	1.634	2.433	1.8	5.033	0.667	0.834	0.1		1.4	1.3	2.766	18	0.366	4.667	0.3	0.066
																					0.5	0.633	16	1.1	11.3	0.667	1.366	3.066		1.367	7.066	1.434	1.166	1.534	1.2	4.634	5.5
																					0.6	0.833	0.9	5.866	1.633	0.466	0.9	0.167		1.267	6.734	0.066	1.834	0.333	0.7	6.7	1.133
																					0.8	0.5	0.7	0.633	43.466	2.3	0.667	0.133		4.3	41.733	0.633	1.567	0.166	9.633	0.566	1.9
																					2.033	2.734	1.467	0.6	0.7	0.7	0.533	10.767		1.433	0.8	6.733	4.199	5.167	2.033	0.367	0.867
																					0.634	0.066	1.6	0.7	10	16.867	1.467	1.566		1.733	3.266	0.1	0.634	0.067	1.3	24.833	34.733
																					1	2.034	1.4	1.533	0.634	0.533	38	47.7		1.3	3.667	0.134	2.633	0.366	1.267	1.433	0.633
																					0.533	5.8	0.433	0.9	0.666	0.567	0.733	1.233		1.367	3.333	0.866	0.833	0.5	4.133	0.6	0.634
																					5.867	1.2	2.4	1.967	0.634	0.766	1.267	10.567		5.733	13.033	1.1	9.267	0.667	16.2	0.067	0.9
																					37.899	1.666	3.633	0.133	0.7	0.467	1.266	8.799		1.234	17.133	0.1	0.767	2.8	1.3	3.2	5.966
																					0.6	0.133	3.5	1.533	0.366	0.633	0.633	1.6		1.033	1.767	0.3	1.833	1.1	1.167	1.8	3.167
																					0.867	0.933	3.6	0.933	0.7	0.5	0.1	6.767		2.933	2.833	1.1	1.2	5.7	2.833	0.4	0.867
																					1.633	0.5	1.534	3.067	3.334	0.767	1.033	1.967		2.067	5.5	0.6	0.867	0.4	8.666	0.433	1
																					0.167	0.867	2.633	5.933	4.366	0.7	1.833	1.4		2	1.134	0.5	0.633	1.5	1.134	3	0.333
																					0.6	5.433	2.433	1.267	1.733	0.933	0.9	1.033		1.3	6.533	1.3	20.266	6.733	1.133	0.433	10.266
																					2	0.833	0.067	1.033	4.334	0.7	0.6	8.134		1.266	12.3	0.5	1.2	0.4	1.167	0.067	1.9
																					0.733	15.034	0.1	1.6	1.3	0.8	1.534	0.266		2.034	0.566	1.3	28.767	0.367	3.666	39.033	19.233
																					22.133	1.733	0.1	1.034	0.9	0.6	0.133	0.167		1.2	1.6	1.5	1.333	0.5	1.2	2.833	10.9
																					1.5	2	126.999	3.366	0.734	0.634	9.733	1.667		9.2	1	4.067	4.1	0.766	3.334	1.9	43.067
																					0.667	2.066	0.2	0.134	0.833	1.599	0.7	1.933		1.133	1.667	0.3	1.333	0.4	2.166	0.567	0.6
																					0.833	1.067	0.333	0.667	0.8	0.634	1	0.066		0.7	36.133	1.966	19.033	2.867	0.7	24.133	16.433
																					1.1	0.133	0.7	0.8	0.8	2.533	0.8	0.634		4.433	2.3	2.367	2.267	0.567	0.834	1.067	1.7
																					2.033	22.967	1.967	1.433	8.7	1.033	1.233	25.633		3.167	1.333	0.1	1.967	0.466	5.166	7.933	18.133
																					0.634	0.866	2.2	0.534	0.666	0.834	0.167	1.066		1.633	3.967	1.333	1.066	2.367	1.333	0.4	0.6
																					0.866	2.934	0.299	0.133	2.3	0.6	33.6	6.367		3.6	6.033	0.133	11.667	6.367	1.267	0.433	5.9
																					0.467	2.2	5.267	0.7	11.834	0.766	4.266	3.267		1.733	0.633	0.267	0.966	0.633	4.5	20.867	1.033
																					1.233	0.533	2	0.8	0.633	0.834	0.7	4.766		5.034	3.5	1.833	0.867	4.5	1.2	1.2	0.7
																					4.667	2.267	0.433	1	3.067	17.2	0.667	0.567		0.933	1.634	1.4	1.067	1.033	1.367	12.666	2.1
																					0.766	1.3	0.467	0.667	12.466	1.733	0.933	1.133		13.633	19.333	5.1	0.733	0.067	4.166	1.767	29.6
																					0.767	3.766	5.433	0.9	20.367	0.666	1.434	1.9		9.367	3.933	0.1	0.8	10.4	1.134	1.2	19.3
																					0.867	0.134	2.834	2.366	4.433	1.434	1.966	0.6		0.833	1.133	1.1	17.067	0.366	0.466	18.333	2.033
																					0.833	1.433	18.466	1.467	0.8	0.666	2.6	0.567		3.833	5.667	1.4	0.833	0.067	0.6	0.967	1.2
																					0.5	1.833	0.467	1.567	1.166	0.667	41.533	2.2		0.9	2.967	3.634	3.233	0.867	3.6	0.5	5.233
																					3.066	0.067	0.566	0.866	3.534	0.433	1	2.499		2.5	0.766	0.966	98.799	1.5	1.333	23.999	2.667
																					0.833	2.6	7.6	0.8	0.666	0.734	1.333	1.2		24.867	1.734	1.734	0.767	13.699	4.1	1.934	1.8
																					1	2.833	0.067	1.833	1	0.733	1.067	1.066		1.1	9.466	0.3	1.433	0.534	3.034	1.333	32.566
																					0.933	0.067	3.233	1.067	0.734	1.6	2.167	3.067		1.333	0.1	1.866	3.133	0.733	1.066	0.367	0.567
																					0.4	2.667	2.867	0.533	0.333	0.733	0.7	0.3		1.633	2.9	0.9	3.434	0.333	0.9	0.7	0.866
																					1.367	0.6	0.267	0.567	1.7	0.967	0.566	1.833		1.467	2.433	15.7	1.033	0.134	10.067	0.133	1.034
																					0.133	0.767	0.666	0.633	6.767	0.567	1.133	0.9		1.433	0.134	0.5	2.433	4.533	1.067	0.7	1.134
																					0.8	0.133	0.067	1.033	1.8	0.7	1.034	2.333		1.6	5.033	1.7	0.9	16.533	1.233	1.5	0.7
																					0.434	4.8	0.133	1.1	0.8	0.6	1	0.2		2.633	8.433	1.367	3.3	15.133	1.4	0.567	2.8
																					1.5	2.2	3.3	1.133	0.533	0.6	0.966	32.233		7.367	2.367	0.133	0.733	0.867	0.633	0.3	5.1
																					7.9	0.133	0.333	1.967	0.067	0.7	0.9	5.2		0.7	1.7	1.6	1.034	0.833	2.167	26.933	0.833
																					0.5	2.2	3.9	0.5	12.766	1	0.067	0.7		1	8.4	0.333	0.833	1	1.333	1.966	8.033
																					0.766	1.534	2.5	0.667	6.967	0.8	2.133	0.767		10	4.9	1.733	1.233	1.234	2.4	1.434	2.633
																					0.467	7.399	1.634	0.6	1.833	0.866	0.634	4.399		0.566	1.7	0.267	1.567	1.133	1	0.099	36.067
																					1.8	45	3.5	0.7	2.133	0.6	0.8	4.1		0.134	3.933	1.933	0.733	0.967	1.2	15.867	1.233
																					0.633	1.633	83.332	1.066	0.7	0.734	0.866	1		1.8	20.2	2.034	8.3	2.7	0.467	1.667	1.467
																					4.967	8.234	0.4	0.9	0.8	1.033	0.067	1.1		12.866	2.866	3.533	0.767	4.299	5.133	0.066	2.5
																					0.933	2.1	3.233	1.667	0.067	0.833	1.167	0.1		1.134	7.434	1.033	0.8	0.067	1.233	1.067	57.266
																					0.833	0.666	0.5	2.6	8.833	1.033	0.699	35.5		2.2	1.466	7.567	36.799	0.067	5.234	0.633	0.733
																					4.6	3.1	2.234	1.3	1.7	0.7	1.234	3.733		2.533	5.1	0.067	0.767	22.633	3.466	0.5	2.3
																					17.667	2.167	2.166	1.1	0.867	0.7	1.2	1.1		26.933	1.4	1.4	9.833	1.7	1.333	0.5	0.6
																					0.5	0.933	1.034	1.8	0.766	0.767	6.7	1.434		0.8	1.3	0.133	0.9	5.566	0.967	0.067	2.7
																					0.466	42.366	0.266	1.966	0.734	0.533	1.033	3.699		4.5	9.633	0.533	2.1	0.834	8.3	5.966	15.2
																					0.7	0.867	0.467	1.567	7.466	0.634	32	0.7		10.033	1.1	2.934	1.1	2.433	1.633	1.467	0.833
																					0.534	1.267	0.267	0.133	3	0.733	0.533	0.3		1.267	4.2	1.833	1.067	0.4	1.3	0.333	4.933
																					1.233	0.6	2.433	1.733	3.167	0.733	1.3	0.833		5.066	6.2	1.066	1.767	5.5	1.534	0.934	5.134
																					4.3	0.866	1.833	0.6	0.733	2.733	18.633	0.433		1.934	14.167	0.3	0.533	2.433	0.966	0.433	1.966
																					0.833	0.134	0.1	6.567	0.834	0.6	1.3	12.134		2.5	26.766	6.5	3.1	17.8	12	0.367	33.7
																					0.6	1.333	3.6	0.367	8.133	0.866	2.533	0.6		1.5	1.767	1	0.667	0.467	1.067	0.7	0.767
																					0.933	2.8	0.9	14.7	0.833	0.634	9.1	0.7		1.466	12.9	1.367	1.099	1.166	7.166	18.3	1.1
																					4.2	12.966	2.733	0.833	7.067	0.6	0.934	0.666		1.8	0.8	0.267	1.234	1	1.1	1.099	0.833
																					1	1.067	1.5	0.1	1.166	0.7	0.833	4.833		1.267	9.866	0.233	0.766	0.067	1.467	0.4	0.9
																					0.933	2.033	2.467	1.9	0.834	0.633	0.767	0.967		7.1	10.1	0.6	1.1	0.367	1.7	0.667	2.633
																					0.133	0.134	27.566	3.9	0.066	0.867	0.9	2.7		0.666	1.067	1.567	16.667	4.866	14.466	2	0.134
																					1	3.5	0.534	1.966	0.9	0.733	0.666	1.4		0.9	4.1	0.333	0.733	0.434	3.434	0.133	1.133
																					0.567	9.499	0.766	17.334	1.333	1.8	1.567	0.066		2.334	4.366	2.467	0.834	0.066	1.666	76.466	0.733
																					4.633	1.5	0.067	0.633	6.4	0.767	0.8	9.833		1.133	8.067	1.533	0.666	0.9	1.6	1.2	0.134
																					0.934	1	2.033	1	0.8	0.6	0.9	1.567		10.533	1.4	1.366	63.866	2.034	1.8	1.667	25.466
																					1.833	1.067	0.134	2	2.967	0.733	0.367			0.6	41.599	0.367	7.7	29.799	1.167	1.667	7.1
																					0.6	1.867	0.166	0.766	1.6	0.633	1.3			8.033	2.167	0.167	0.933	0.1	1.233	0.966	7.6
																					0.767	0.266	0.2	0.934	2.366	0.367	0.566			0.5	12.433	0.166	4.5	0.667	7.234	20.233	13.2
																					0.866	1	6.167	0.6	1.034	0.467	1.467			0.7	2.667	1.334	0.634	0.167	1.033	1.3	0.8
																					0.734	0.734	0.133	0.966	5.633	8.033	0.133			1.6	3.8	4.433	1.133	0.166	1.167	1	9.466
																					0.633	8.433	3.933	1.3	0.867	0.066	1.3			6.9	1.3	1.667	2.4	0.5	1.166	0.4	0.6
																					0.1	1.967	1.9	1.8	3.266	0.567	17.167			0.634	6.033	0.4	3.633	7.067	1.567	1.034	47.033
																					1.3	1.366	2.134	0.734	12.134	0.467	0.833			16.599	4.133	1.033	0.667	5.033	3.633	0.433	0.934
																					1.567	0.9	3.4	30.299	12.566	0.5	2.033			1.234	1.334	1.767	5.667	15.4	2.9	0.667	0.833
																					0.566	0.833	2.7	1	0.667	0.567	0.6			1.1	2.966	1.333	0.933	0.7	1.133	0.4	1.466
																					6.8	0.067	12.8	0.567	0.8	0.433	1			1.166	3.267	7.667	2.666	1.6	7.734	0.633	5.6
																					0.967	2.7	0.066	1.2	1.6	0.733	0.533			2.5	3	0.1	16.834	0.167	1.133	0.567	0.6
																					0.133	0.066	3.033	0.9	1.166	1.567	15.667			2.534	19.833	1.366	0.633	0.833	2	0.066	3.134
																					4.733	1.167	0.1	0.733	12.067	0.133	1.166			1.333	2.567	1.267	2.067	2.933	1.2	15.633	0.833
																					0.634	2.166	0.334	0.967	0.6	0.733	10.634			0.567	0.066	0.6	0.6	0.067	0.8	1.834	18.9
																					10.7	1.1	3.133	0.6	0.067	9.234	2.133			31.566	10.3	1.433	1.233	2.267	4.966	0.533	7.6
																					0.933	1.334	1.633	0.867	0.499	0.7	1.767			1.967	25.1	2	0.6	0.333	1.134	2.533	7.466
																					0.733	0.766	8.2	1.4	9.1	0.633	0.633			3.1	3.333	1.3	0.567	2	0.9	0.734	1.367
																					0.7	1.134	0.1	1.633	0.7	0.7	0.467			1.333	5.9	2.433	7.033	22.166	1.033	0.133	0.767
																					1.1	9.833	61	1.266	0.867	1.067	0.933			3.5	2.4	1.2	0.466	0.567	0.6	0.433	1.766
																					0.466	9.233	0.333	0.867	4.967	0.5	0.1			0.8	1.467	0.6	1.034	0.7	0.1	0.967	1.334
																					0.667	1.3	0.133	0.7	1.433	0.833	1.533			5.5	8.833	1.4	0.6	1.867	3.4	0.133	17.766
																					0.7	0.7	3.034	0.566	1.3	0.467	1.8			1.366	1.4	1.5	1.766	0.9	1.1	48.566	0.9
																					0.767	3.7	3.033	1.167	0.9	1.1	0.1			2.467	5.233	1.767	1.934	30.399	0.934	42.2	1.833
																					0.633	7.533	2.767	0.867	2.833	0.366	6.4			0.767	3.4	2.6	0.433	0.834	1.366	1.767	0.9
																					2.7	1.934	11.166	0.166	1.667	0.934	1.067			3.766	6.1	2.6	0.167	1.033	7.167	45.066	0.334
																					0.766	1.033	2.867	0.834	12.733	0.367	0.366			7.1	5.067	2.366	1.433	4.833	1.3	0.866	7.533
																					0.434	0.633	2.133	0.8	0.533	0.633	3			5.5	2.033	1.667	0.667	37.033	0.833	1.834	0.9
																					5.366	1.467	2.367	1.633	1.767	0.667	0.933			7.3	5.733	1.5	0.8	1.267	0.567	0.833	0.567
																					1	2.633	3.2	34.666	5.833	0.6	2.1			3.467		0.3	9.833	9.666	4.766	0.433	12.533
																					0.6	0.134	2.9	0.5	1.6	0.567	0.9			1		0.167	13.5	0.567	1.134	1.067	0.8
																					14.934	0.666	8.333	0.9	2	5.366	0.366			2.733		1.633	1.066	3.267	1.366	1.067	1.166
																					1.266	10.567	1.366	0.967	1.067	0.533	0.167			1.533		4.433	1.134	1.566	0.967	1.033	32.867
																					1.767	2.166	0.067	0.9	0.733	0.467	11.467			9.667		0.1	1.166	16	3.767	0.4	1.5
																					0.966	1.5	0.466	2.166	0.067	0.6	1.333			0.966		1.267	3.834	0.8	1.233	1.2	1
																					2.367	0.733	2.567	0.467	3.366	0.667	0.667			4.4		1.367	3.366	1.1	2.533	0.533	0.666
																					0.9	2.866	2.266	0.5	1.8	0.533	0.4			1.7		0.133	0.9	0.567	1.233	0.8	1.934
																					6.6	0.1	2.067	1.033	0.134	1.133	0.3			0.967		0.733	2.833	25.933	2.267	0.7	0.766
																					0.7	5.534	0.3	7.434	1.366	0.067	3.4			16.667		55.933	0.067	0.633	0.833	0.467	0.634
																					0.9	1.533	0.133	0.433	7.367	4.233	0.799			0.8		0.467	0.067	0.633	2.334	2.533	8.199
																					0.767	0.733	0.167	0.467	0.633	0.067	34			0.767		0.066	0.6	0.9	1.1	3.833	0.834
																					0.767	0.1	1.067	1.766	0.8	0.7	0.7			1.233		1	1.166	0.934	0.733	1.534	13.666
																					0.467	3.867	6.566	0.867	1.3	0.133	1.567			2.367		0.134	1.034	0.1	0.8	1.266	0.667
																					1.733	0.733	3.1	0.7	0.734	0.867	1.366			3.133		0.166	0.667	2.233	17.733	0.134	79.532
																					7.033	0.667	6.133	4.033	1.266	0.966	0.9			13.9		1.034	1.133	0.567	1.133	0.066	28.3
																					0.567	3.633	5.167	11.4	0.667	0.667	15.534			0.867		1.366	0.833	7.866	5.3	2.4	1.267
																					4.7	1.967	6.767	1	1.867	6.967	2.4			1.233		2.5	2.967	0.834	0.9	0.334
																					0.8	0.733	0.7	1.167	0.866	0.6	1.333			1.967		0.3	0.5	2.3	0.967	10.766
																					0.667	0.667	10.6	0.666	8.367	1.2	1.766			1.366		0.467	0.1	0.899	0.833	1.367
																					0.833	0.966	2.8	6.9	0.767	1.066	0.667			1.134		1.2	0.533	1.067	3.2	0.133
																					2.034	1.567	91.265	0.1	1.033	4.967	1.167			1.366		0.2	1.133	62.066	3.234	0.1
																					1.2	5.033	0.434	0.833	0.633	0.5	13.666			1.2		1.4	0.467	3.233	1.4	0.633
																					0.566	1.933	0.133	1.6	0.933	0.467	0.9			1		2.266	0.633	0.7	1	2.434
																					5.034	0.5	0.067	0.734	4.767	0.6	1.167			1.633		0.3	0.1	0.5	3.699	0.667
																					0.766	1.5	12.766	0.633	0.567	16.066	0.567			1.234		1.334	5.1	1	1.3	0.367
																					0.4	0.634	3.367	1.867	8.133	0.933	1.466			1.533		1.533	6.5	4.5	0.7	0.766
																					0.6	12.733	0.1	1.166	0.733	1.4	13.033			3.133		1.567	0.767	1.167	0.967	0.5
																					0.8	1.033	0.2	0.067	0.767	0.567	1.134			1.6		3.4	0.567	0.833	4.6	0.367
																					0.434	0.6	2.9	9.767	0.8	1.2	1.166			5.567		1.466	3.666	0.1	1.767	1.4
																					1	1.733	0.2	0.466	5.267	0.667	0.567			0.5		0.167	0.3	8.334	3.366	0.366
																					0.8	0.167	2.6	2.4	0.533	0.6	0.8			41.433		2.266	0.6	1.9	6.067	10.1
																					0.566	1.533	19.699	0.634	2.233	1.033	0.967			0.733		0.067	1.433	20.166	1.4	1.934
																					4.2	12.267	3.367	0.799	0.667	0.967	0.8			0.867		1.7	0.967	1.067	1.766	0.833
																					0.834	1.533	0.167	0.667	0.866	0.633	0.933			20.9		0.333	0.067	1.033	7.034	0.567
																					0.833	2.2	0.1	3.1	16.934	4.9	0.767			4.033		9.667	1.833	1.133	1.133	2.266
																					0.833	0.834	0.533	0.633	0.533	0.433	4.633			8.766		0.133	23.2	0.934	1.2	0.367
																					0.534	0.833	0.433	8.367	0.6	0.533	1.1			3		1		1.766	1.3	0.867
																					7.899	0.933	0.4	0.433	3.067	0.567	9.7			1.567		1.734		0.9	0.933	9.566
																					0.667	1.6	2.733	1.167	0.666	0.8	0.733			2.567		1.266		53.566	13.234	1.267
																					2.233	4.333	1.034	3.933	0.733	0.566	5.9			3.566		0.1		0.134	1.033	0.433
																					0.967	57.6	0.333	4.367	3.6	0.767	0.834			1.9		0.234		0.566	1.233	9.933
																					0.6	0.833	3.533	0.666	0.567	0.7	0.633			0.867		2.1		3.367	1.767	1.4
																					1.867	15.767	0.134	0.467	2.567	2	26.866			22.633		11.599		3.733	1.066	2.367
																					0.733	12.666	5.6	1.333	1.033	4.133	0.867			68.233		0.4		0.7	1.367	0.4
																					3.4	0.767	2.866	0.367	0.7	0.534				5.4		3.1		4.267	0.533	10.766
																					0.767	2.466	0.067	0.833	4.733	0.533				5.433		1.034		0.266	7.134	1.334
																					7.399	5.3	3.333	0.8	0.834	3.7				1.766		1.4		0.3	1.133	0.433
																					0.8	1.3	0.567	7.767	1.266	0.5				1.667		1.4		14.3	1.5	0.533
																					0.834	1.734	3.066	0.667	0.834	0.5				2.667		1.566		9.3	1.667	0.767
																					0.6	0.733	4.6	7.333	2.4	0.833				0.666		1.434		0.6	1.166	0.8
																					3.3	0.8	0.167	0.433	0.666	3.533				3.8		0.633		0.633	1.134	0.8
																					3.633	2.867	5.767	5.167	2	1.8				1.067		1.7		0.134	1.933	1.067
																					0.6	28.766	0.3	0.433	0.7	0.567				1.767		7.666		1.233	6.8	2.166
																					0.6	1.533	6.933	1.733	6.9	21.833				1.3		0.134		4.433	1.166	0.067
																					0.7	0.934	3.133	1.034	0.533	0.8				9.7		1.633		16.6	0.634	0.9
																					0.767	3	6.267	0.9	7.167	0.833				0.866		1.333		43.299	4.6	0.067
																					0.733	13.199	1.766	0.566	1.467	0.667				1.167		0.9		0.767	2.233	8.966
																					0.633	2.167	0.1	5.167	1	0.6				15.366		0.167		0.8	1	0.333
																					0.134	1.033	7.333	0.6	1.1	0.567				2.8		1.433		0.8	0.733	1.667
																					0.9	0.9	0.167	0.133	0.7	0.566				15.633		1.7		0.633	6.8	0.767
																					2.766	2.6	3.633	2.3	0.666	0.567				0.867		2.634		0.6	1	0.1
																					0.733	1.3	10.466	0.134	5.233	0.667				0.7		1.566		0.5	0.6	0.933
																					2.2	1.834	0.167	9.299	0.667	0.533				0.867		1.134		0.167	4.733	0.433
																					0.567	1.333	2.8	0.967	0.9	4.533				7.666		1.833		11.866	2.1	49.8
																					2.2	1.433	3.433	1.233	9.3	1.534				11.3		0.9		1.467	1.267	1.433
																					0.667	3.167	0.1	0.467	0.7	9.599				7.1		11.8		0.167	0.733	0.633
																					1.167	0.667	6.2	1.433	1.1	1.4				0.733		0.1		0.166	0.7	70.666
																					0.867	24.499	11.4	2.134	0.6	0.367				2.867		0.1		0.134	6.2	10.667
																					0.6	5.534	0.1	0.066	4.233	12.067				6.967		1.1		1.2	0.967	1.267
																					0.666	0.3	8.067	8.534	0.7	0.466				0.733		1.366		0.466	0.867	1.3
																					0.667	0.533	0.333	0.9	0.067	0.534				1.767		0.334		13.733	3.566	0.7
																					0.667	0.533	6.7	1.166	1.867	0.533				0.5		1.333		0.4	1.2	0.966
																					0.7	2.333	100.232	0.5	0.633	4.1				3.666		0.933		0.467	0.933	0.1
																					5.933	0.734	0.4	0.534	0.734	0.4				1.5		1.267		0.567	17.567	1.4
																					0.567	1.1	2.167	6.666	0.833	0.5				94.766		1.767		1.333	1.033	2.033
																					0.933	1.766	2.833	0.067	0.6	0.6				0.667		0.166		0.133	7.234	0.634
																					4.267	13.3	3.7	0.933	0.6	0.6				0.633		0.1		0.5	0.633	35.733
																					0.6	0.967	3.167	2.867	2.567	0.8				1.166		0.134		0.134	1	0.933
																					1.2	9.4	0.133	0.333	0.9	0.233				0.767		1.133		0.6	1.2	0.533
																						2	1.8	0.767	1.699	1.033				0.8		1.3		7.466	1.1	1.834
																						0.6	4.333	1.033	5.7	0.1				1.267		2.033		0.3	2.1	0.766
																						3.866	4.267	0.433	3.034	16.2				1.3		0.667		2.6	1.066	1.134
																						1.667	4.2	0.1	0.7	0.467				0.833		1.033		71.866	4.334	0.966
																						2	12.533	0.567	0.833	0.5				11		3.767		1.567	1.266	0.1
																						0.067	1.433	2.8	2.767	0.533				0.833		0.133		2.566	3.3	0.867
																						15.299		0.533	0.833	0.467				6.9		1.533		1.567	1	2.233
																						1		0.5	2.8	0.6				24.9		25.5		28.8	0.834	1.3
																						2.267		7.367	1.233	0.7				2		0.4		4.666	0.933	0.7
																						0.067		0.4	4.767	0.433				0.733		1.567		0.834	3.5	0.5
																						10.633		2.2	0.366	0.7				0.8		0.1		11	1.066	1.3
																						3.967		0.633	1.734	1.1				11.233		0.1		0.3	0.534	0.467
																						0.766		0.3	0.6	0.733				0.9		0.1		0.366	2.366	0.466
																						0.6		0.133	2.9	0.867				3.7		1.566		0.733	1.134	0.534
																								2.434	1.633	0.5				1.5		1.8		0.334	0.9	1.166
																								0.466	0.633	0.533				4.467		0.2		0.7	7.3	0.6
																								15.834	5.5	0.467				6.966		0.434		1.066	4.333	1.267
																								0.366	0.534	0.567				1.8		0.1		16.3	1.7	0.133
																								0.967	0.833	3.5				1.6		1.566		0.434	1.567	1.767
																								0.767	2.167	0.566				4.1		0.134		1.1	2.733	1.6
																								1.099	7.733	0.434				0.6		1.833		0.5	1.566	0.633
																								0.134	0.733	0.666				1.534		50.733		1.5	2.4	1.133
																								0.533	0.733	4.134				1.3		0.066		1.033	1.634	1.167
																								1.533	0.8	0.5				3.666		1.034			12.4	94.299
																								2.367	2.734	1.233				1.034		1.7			1.9
																								0.667	22.966	0.833				2.233		0.1			5.466
																								2.633	0.5	0.4				1.033		1.5			4.7
																								0.7	0.667	8.233				3.433		1.433			4.9
																								2.267	0.633	0.734				9.4		1.4			13.133
																								0.433	1.033	0.6				6.467		0.5			1.467
																								1.233	4.7	0.066				0.933		0.1			2
																								1.367	105.399	8.367				6.5		1.5			1.3
																									0.967	0.967				1.734		2.4			1.333
																									1.1	0.6				1.033		1.533			2.067
																									1.5	0.733				9.233		2.167			5.933
																									1.333	1				0.733		0.433			1.6
																									1.434	0.467				1.367		38.666			1.333
																										1.333				19.266		0.1			12.967
																										0.7				7.767		0.1			1.4
																										0.6				1.1		1.4			1.266
																										0.5				4.367		1.2			1.634
																										0.6				12.5		2.1			1.166
																										0.133				5.699		0.967			1.867
																										0.767				0.967		1.5			2.633
																										0.6				7.233		1.866			1.067
																										0.634				1.3		1.5			1.6
																										0.066				1		6.334			1.1
																										0.6				12.067		0.1			3.2
																										1.034				1.367		1.1			0.667
																										0.433				1.399		1.533			3.133
																										5.3				5.634		1.833			1.133
																										0.5				0.666		1.834			1.2
																										0.433				7.367		0.866			0.967
																										1.467				1.9		0.234			4.666
																										0.467				9.5		5.066			1.034
																										1.333				0.866		0.067			0.633
																										0.067				1.567		1.3			1.133
																										0.533				1.067		0.166			1.1
																										0.433				1.133		1.434			10.567
																										1				4.667		2.433			3.067
																										0.7				5.666		8.3			1.466
																										3.167				0.767		1.1			1.2
																										0.1				1.133		1.9			6.133
																										13.933				1.2		0.167			1.134
																										1.2				2.3		0.433			0.866
																										0.567						0.933			1.2
																										0.566						1.467			0.8
																										0.667						3.733			11.4
																										4.233						1.667			1.1
																										1						0.666			1.1
																										0.467						1.267			4.233
																										0.5						1.567			1
																										0.433						23.366			1.167
																										0.467						0.333			5.367
																										0.6						5.2			1.833
																										0.467						0.134			1
																										0.566						1.533			0.867
																										0.934						1.7			5.966
																										0.566						1.067			1.433
																										49						5			3.7
																										1						1.466			7.4
																										0.966						1.633			1.167
																										0.667						0.934			1.1
																										0.733						1.566			6.733
																										0.934						0.8			1.2
																										0.966						6.034			1.267
																										0.667						0.133			2.2
																										0.533						1.233			2.233
																										0.567						0.134			1.067
																										7.4						2.6			1
																										21.666						0.1			7.266
																										0.9						1.366			1.934
																										0.6						0.3			0.966
																										0.6						0.2			5.6
																										0.567						1.567			4.267
																										0.5						3.2			1.066
																										0.533						1.266			1.467
																										5.767						3.567			10.967
																										0.5						1.9			8.1
																										0.633						0.133			2.033
																										0.533						0.167			1.4
																										4.8						1.166			0.867
																										1.067						1.1			10.433
																										0.8						2.567			13.8
																										0.533						1.233			22.533
																										0.467						0.1			1.4
																										1.2						0.134			1.766
																										0.5						1.433			1.367
																										0.567						1.433			1.333
																										0.567						2			1.234
																										0.666						0.433			1.566
																										0.3						0.467			2.167
																										1.1						1.433			1.2
																										0.734						3.3			1.2
																										0.6						0.3			1.333
																										0.166						1.534			2.033
																										30.5						5.233			0.9
																										0.533						1.233			6.567
																										0.734						0.434			0.9
																										0.8						0.166			1.167
																										0.966						1.533			2.5
																										0.734						1.234			1.066
																										0.766						1.6			1.367
																										0.767						45.966			1.166
																										15.666						0.333			4.067
																										0.834						0.9			1.033
																										0.733						2.067			19.067
																										0.733						0.867			1.133
																										1.067						0.9			1.067
																										0.6						37.432			1.133
																										0.533						0.4			1.133
																																0.867			0.967
																																0.067			0.8
																																1.166			1.533
																																0.1			3.8
																																1.1			0.9
																																1.367			1.1
																																1.433			1
																																1.634			1.6
																																1.3			0.934
																																2			4.5
																																1.466			1.033
																																1.8			1.2
																																1.434			1.6
																																0.666			8.9
																																1.4			1.166
																																1.267			1.334
																																5.633			1.2
																																0.1			1.366
																																1.6			0.9
																																1.6			15.467
																																0.633			11.7
																																1.034			2.466
																																9.3			1.367
																																0.1			1.033
																																1.233			1.167
																																1.5			1.1
																																0.066			0.833
																																5.334			1.767
																																0.133			0.866
																																1.633			0.7
																																1.6			5.534
																																1.4			1.066
																																1.567			0.7
																																1.567			3.334
																																3.6			1
																																1.366			0.733
																																17.6			5.6
																																0.133			1.066
																																1.867			0.667
																																1.7			21.967
																																2			0.966
																																12.6			1.034
																																0.1			0.833
																																1.3			0.9
																																3			1.066
																																0.067			1.067
																																0.067			1.133
																																1.133			1.167
																																0.133			0.7
																																0.3			5.833
																																0.3			1.1
																																1.367			1.1
																																1.7			1.7
																																16.366			1.634
																																0.4			7.566
																																0.134			3.367
																																2.5			1.3
																																1.333			0.966
																																0.067			8.567
																																1.1			1.4
																																0.299			1.5
																																1.367			1.333
																																3.333			5.4
																																1.167			3.467
																																1.8			1.1
																																1.267			0.766
																																0.966			13.5
																																1.267			1.5
																																0.067			1.5
																																1.266			0.667
																																0.334			6
																																0.733			1.266
																																1.433			1.934
																																1.4			4.633
																																0.334			1.133
																																0.966
																																0.367
																																5.666
																																33.2
																																1.2
																																0.067
																																1.8
																																3.666
																																1.2
																																2.334
																																0.733
																																20.333
																																0.8
																																0.967
																																0.9
																																0.333
																																1.233
																																1.4
																																1.167
																																0.333
																																1.5
																																2.7
																																1.3
																																1.367
																																7.733
																																1.333
																																1.434
																																19.333
																																1.233
																																13.867
																																0.666
																																0.1
[truncated: 15 more columns]
