# Supplementary material for: Motor thalamus supports striatum-driven reinforcement
Source: eLife. 2018 Oct 8;7:e34032. doi: 10.7554/eLife.34032 (PMC6181560; doi:10.7554/eLife.34032)
Supplement: Figure 2—figure supplement 1—source data 1. [file elife-34032-fig2-figsupp1-data1.xlsx]

## Sheet: Figure 2 -figure supplement 1
a								b
A/N ratio				PPR					naive
ChR2	eYFP	naive		ChR2	eYFP	naive			cell#
1.79	2.27	2.2		0.71	0.81	0.87		current (pA)	1	2	3	4	5	6	7	8	9	10
2.62	2.9	3.86		0.6	0.71	0.53		100	0	0	0	0	0	0	0	0	0	0
3.41	2.34	3.43		0.53	0.9	0.82		200	4	0	0	0	10	0	0	0	0	0
3.58	4.12	2.37		0.87	0.79	0.91		300	14	0	0	10	21	7	4	0	5	5
3.81	1.85	3.06		0.79	1	0.89		400	19	11	1	19	26	19	16	0	13	14
2.47	3.05			0.72	0.85			500	22	21	13	24	28	26	22	0	18	18
4.15				0.86				600	23	25	20	27	29	30	26	4	22	21
				0.78
				1.38					ChR2
				1.18					cell#
								current (pA)	1	2	3	4	5	6
								100	0	0	0	0	0	0
								200	0	6	0	0	0	0
								300	11	14	0	0	0	0
								400	21	19	11	5	4	4
								500	27	21	19	17	14	16
								600	30	24	24	24	21	22
