# Supplementary material for: Motor thalamus supports striatum-driven reinforcement
Source: eLife. 2018 Oct 8;7:e34032. doi: 10.7554/eLife.34032 (PMC6181560; doi:10.7554/eLife.34032)
Supplement: Figure 2—source data 1. [file elife-34032-fig2-data1.xlsx]

## Sheet: Figure 2
	Figure 1b							Figure 1c										Figure 1d
	D1tmt MSN			D1tmt MSN															naive
	mEPSC frequency			mEPSC amplitude				A/N ratio					PPR						cell#
Figure 2b								Figure 2c										Figure 2d
mEPSC frequency				mEPSC amplitude				A/N ratio					PPR					naive
ChR2+	ChR2-	naive		ChR2+	ChR2-	naive		ChR2+	ChR2-	eYFP	naive		ChR2+	ChR2-	eYFP	naive			cell#
1.89122	1.83586	4.8852		17.7044	13.7471	15.8972		4.98	3.2	6.44	1.97		0.75	1.43	0.61	1.16		current (pA)	1	2	3	4	5	6	7	8	9	10	11	12	13	14
1.5156	3.5461	2.68097		16.8387	14.8037	13.0821		2.97	4.16	2.39	5.06		0.91	1.06	0.55	0.69		100	0	0	0	0	0	0	0	0	0	0	0	0	0	0
1.49013	6.92042	7.50188		12.4095	16.612	17.4431		2.39	3.38	5.16	5.97		0.85	0.59	0.67	0.92		200	0	0	0	0	0	0	0	0	0	0	0	0	0	0
3.85357	4.49438	8.2713		19.719	17.2076	16.8734		3.55	5.32	3.05	3.43		0.77	0.58	0.44	0.67		300	2	0	5	9	6	0	0	0	0	0	0	0	0	0
10.0503	11.1111	10.977		21.7108	17.8374	16.7518		2.88	1.81	1.71	2.57		0.65	0.94	0.7	0.68		400	15	4	15	16	15	0	10	12	6	1	0	0	0	0
1.14815	3.10559	17.1821		14.3219	18.2769	22.7457		2.62	1.34	1.93	2.77		0.85	0.83	0.73	0.82		500	21	17	19	21	25	10	17	20	15	11	0	0	5	2
6.36943	7.27273	4.51467		17.5543	21.0757	16.4442		4.51	3.31		2.84		0.87	0.73	0.56	0.86		600	24	24	21	23	26	18	22	25	20	18	6	9	16	11
8.11685	6.79684	4.58128		20.3452	21.7864	19.9061		2.58						0.46	0.72
6.58059	5.33232	2.94529		22.6354	17.8673	26.251								0.56	0.79			ChR2
4.77663	7.47595	8.57236		20.748	19.9411	21.9163								0.92	0.72				cell#
		3.52197				19.9883								1.04	0.99			current	1	2	3	4	5	6
		3.97433				19.5687												100	0	0	0	0	0	0
		3.60776				20.4385												200	0	0	0	0	0	0
		3.6063				18.0783												300	0	0	0	0	0	7
		5.3494				24.1401												400	7	9	2	7	0	17
																		500	17	18	14	15	9	22
																		600	25	24	20	20	18	24
																		eYFP
																			cell#
																		current	1	2	3	4	5	6	7	8
																		100	0	0	0	0	0	0	0	0
																		200	0	0	0	0	0	0	0	0
																		300	0	0	16	0	3	0	0	0
																		400	0	4	22	5	15	2	4	0
																		500	4	10	27	14	23	13	16	4
																		600	11	14	30	19	27	21	24	16
