# Supplementary material for: Motor thalamus supports striatum-driven reinforcement
Source: eLife. 2018 Oct 8;7:e34032. doi: 10.7554/eLife.34032 (PMC6181560; doi:10.7554/eLife.34032)
Supplement: Figure 3—source data 1. [file elife-34032-fig3-data1.xlsx]

## Sheet: Figure 3
Figure 3b				Figure 3c						Figure 3e				Figure 3f						Figure 3h				Figure 3i						Figure 3k				Figure 3l
time (min)	Arch3.0	eYFP			Arch3.0		eYFP			time (min)	ChR2	eYFP			Arch3.0		eYFP			time (min)	ChR2	eYFP			ChR2		eYFP			time (min)	resp	non-resp			resp		non-resp
1	0	1		mouse	a	i	a	i		1	0	0		mouse	a	i	a	i		1	2	1		mouse	a	i	a	i		1	0	1		mouse	a	i	a	i
2	1	4		1	93	41	30	27		2	2	2		1	131	31	57	43		2	6	2		1	126	29	30	15		2	0	3		1	49	15	12	5
3	3	8		2	154	36	70	32		3	8	2		2	138	36	29	70		3	9	5		2	79	15	16	18		3	1	4		2	75	8	3	6
4	3	9		3	72	22	9	31		4	9	4		3	200	23	42	37		4	14	7		3	149	15	6	7		4	1	5		3			10	19
5	6	9		4	44	22	27	40		5	14	7		4	121	24	52	50		5	15	7		4	183	13	1	8		5	3	7
6	9	12		5	29	10	50	25		6	15	12		5	104	41	32	21		6	16	8		5			12	6		6	4	8
7	10	20		6	58	12	17	20		7	21	14		6	67	30	24	30		7	24	8		6			17	36		7	6	8
8	13	20		7	24	15	3	21		8	23	20		7	83	34	40	23		8	25	8								8	7	8
9	14	20		8			27	44		9	26	22		8	67	31	22	48		9	26	8								9	10	9
10	20	20		9			34	56		10	31	23								10	30	8								10	12	9
11	24	20		10			31	52		11	34	23								11	38	8								11	16	9
12	28	20								12	42	25								12	44	8								12	18	10
13	31	20								13	46	25								13	44	11								13	21	10
14	36	20								14	48	25								14	47	11								14	24	10
15	37	20								15	52	26								15	56	11								15	26	10
16	39	20								16	56	26								16	63	11								16	29	11
17	41	20								17	63	26								17	68	12								17	32	11
18	44	20								18	69	26								18	75	12								18	34	11
19	48	21								19	72	27								19	78	12								19	37	11
20	51	21								20	74	29								20	86	13								20	40	11
21	57	23								21	80	29								21	92	13								21	43	12
22	61	23								22	83	33								22	100	13								22	46	12
23	65	23								23	89	33								23	101	13								23	49	12
24	65	23								24	95	36								24	107	13								24	53	12
25	65	24								25	100	36								25	117	14								25	56	12
26	68	24								26	107	36								26	120	14								26	59	12
27	69	26								27	111	36								27	123	14								27	63	12
28	69	26								28	115	39								28	124	14								28	67	12
29	70	26								29	120	41								29	125	16								29	71	12
30	72	27								30	121	42								30	126	16								30	75	12
