# Supplementary material for: Motor thalamus supports striatum-driven reinforcement
Source: eLife. 2018 Oct 8;7:e34032. doi: 10.7554/eLife.34032 (PMC6181560; doi:10.7554/eLife.34032)
Supplement: Figure 4—figure supplement 1—source data 1. [file elife-34032-fig4-figsupp1-data1.xlsx]

## Sheet: Figure 4 - figure supplement 1
b
	D1+			D1+ & MLR-				ex trace	D1+												ex trace	D1+ & MLR-
mouse	pre	laser	post	pre	laser	post				pre1	laser1	pre2	laser2	pre3	laser3	pre4	laser4	pre5	laser5				pre1	laser1	pre2	laser2	pre3	laser3	pre4	laser4	pre5	laser5
1	88.2854	145.808	117.299	43.087	86.2893	50.6666		time (ms)	X (cm)	Y (cm)	Y (cm)	Y (cm)	Y (cm)	Y (cm)	Y (cm)	Y (cm)	Y (cm)	Y (cm)	Y (cm)		time (ms)	X (cm)	Y (cm)	Y (cm)	Y (cm)	Y (cm)	Y (cm)	Y (cm)	Y (cm)	Y (cm)	Y (cm)	Y (cm)
2	23.471	226.892	57.7735	38.1248	108.162	75.629		100	-15.7613	-8.70389											100	-16.5435	-2.32423
3	19.2493	258.563	98.1396	27.4128	211.977	72.5255		200	-15.763	-8.70508											200	-16.5817	-2.33146
4	15.2646	176.988	88.9275	35.894	46.7488	38.5804		300	-15.7644	-8.70629											300	-16.6281	-2.31321
5	36.5513	71.7326	55.6185	62.8701	30.6911	44.6532		400	-15.7657	-8.7075											400	-16.6615	-2.2861
6	29.6332	331.751	76.992	29.5852	184.848	86.9673		500	-15.7669	-8.70871											500	-16.6921	-2.28107
								600	-15.768	-8.70992											600	-16.7187	-2.28881
								700	-15.769	-8.71113											700	-16.753	-2.30241
								800	-15.77	-8.71235											800	-16.779	-2.32093
								900	-15.7708	-8.71358											900	-16.8021	-2.34733
								1000	-15.7716	-8.71485											1000	-16.8045	-2.36381
								1100	-15.7723	-8.71614											1100	-16.7958	-2.39334
								1200	-15.7729	-8.71615											1200	-16.7751	-2.4209
								1300	-15.773	-8.71619											1300	-16.7135	-2.44027
								1400	-15.7727	-8.71652											1400	-16.6121	-2.44945
								1500	-15.7726	-8.71841											1500	-16.4967	-2.43199
								1600	-15.7734	-8.72213											1600	-16.3729	-2.38847
								1700	-15.7747	-8.72604											1700	-16.2352	-2.32517
								1800	-15.7762	-8.73102											1800	-16.0908	-2.22489
								1900	-15.7767	-8.73779											1900	-15.9506	-2.1045
								2000	-15.7782	-8.74603											2000	-15.8315	-1.96606
								2100	-15.7795	-8.75396											2100	-15.7357	-1.83023
								2200	-15.7812	-8.76176											2200	-15.6352	-1.71087
								2300	-15.7826	-8.76902											2300	-15.5277	-1.61712
								2400	-15.7844	-8.77522											2400	-15.4047	-1.55978
								2500	-15.7863	-8.78035											2500	-15.26	-1.53619
								2600	-15.788	-8.78479											2600	-15.1215	-1.54451
								2700	-15.789	-8.78769											2700	-15.0014	-1.57771
								2800	-15.7899	-8.78765											2800	-14.8654	-1.64362
								2900	-15.7907	-8.78696											2900	-14.7391	-1.72606
								3000	-15.7914	-8.78499											3000	-14.6097	-1.82592
								3100	-15.7922	-8.78168											3100	-14.4876	-1.93305
								3200	-15.7926	-8.77838											3200	-14.3455	-2.0581
								3300	-15.7927	-8.7736											3300	-14.1874	-2.19159
								3400	-15.7931	-8.77345											3400	-14.0525	-2.32664
								3500	-15.7941	-8.77216											3500	-13.9615	-2.44364
								3600	-15.7941	-8.77439											3600	-13.9072	-2.57149
								3700	-15.7947	-8.77824											3700	-13.8751	-2.70444
								3800	-15.7949	-8.78191											3800	-13.8885	-2.83199
								3900	-15.7931	-8.77837											3900	-13.9448	-2.96157
								4000	-15.7925	-8.77546											4000	-14.0274	-3.09325
								4100	-15.7942	-8.7946											4100	-14.1266	-3.24894
								4200	-15.7962	-8.80926											4200	-14.1928	-3.40334
								4300	-15.7941	-8.7901											4300	-14.226	-3.54356
								4400	-15.7959	-8.76384											4400	-14.2566	-3.68415
								4500	-15.7985	-8.73838											4500	-14.2959	-3.80829
								4600	-15.8039	-8.72351											4600	-14.3564	-3.90074
								4700	-15.815	-8.70215											4700	-14.4148	-3.97097
								4800	-15.8277	-8.65604											4800	-14.4596	-4.03851
								4900	-15.8381	-8.58659											4900	-14.5007	-4.08541
								5000	-15.8585	-8.50593											5000	-14.5224	-4.13114
								5100	-15.8806	-8.4218											5100	-14.5262	-4.17457
								5200	-15.9073	-8.3461											5200	-14.5218	-4.23863
								5300	-15.9325	-8.30807											5300	-14.526	-4.31507
								5400	-15.9596	-8.28474											5400	-14.5486	-4.39851
								5500	-15.9812	-8.30201											5500	-14.5839	-4.48565
								5600	-16.0051	-8.34309											5600	-14.638	-4.58069
								5700	-16.0227	-8.38502											5700	-14.702	-4.67773
								5800	-16.0297	-8.43141											5800	-14.782	-4.76777
								5900	-16.0303	-8.48532											5900	-14.8658	-4.84506
								6000	-16.032	-8.5449											6000	-14.9521	-4.9118
								6100	-16.0302	-8.60594											6100	-15.0306	-4.96516
								6200	-16.021	-8.65453											6200	-15.0912	-5.00354
								6300	-16.0155	-8.69721											6300	-15.1469	-5.03499
								6400	-16.0157	-8.753											6400	-15.1975	-5.05927
								6500	-16.0198	-8.79877											6500	-15.236	-5.06702
								6600	-16.0329	-8.82047											6600	-15.2607	-5.06945
								6700	-16.0548	-8.79524											6700	-15.2705	-5.07191
								6800	-16.0785	-8.73494											6800	-15.2748	-5.07121
								6900	-16.1148	-8.64451											6900	-15.2677	-5.06833
								7000	-16.1559	-8.52729											7000	-15.2546	-5.07264
								7100	-16.1972	-8.40729											7100	-15.2344	-5.08802
								7200	-16.2326	-8.30653											7200	-15.2202	-5.10376
								7300	-16.2609	-8.23343											7300	-15.213	-5.11799
								7400	-16.293	-8.15747											7400	-15.198	-5.12364
								7500	-16.3251	-8.09257											7500	-15.1855	-5.12799
								7600	-16.3339	-8.02728											7600	-15.1749	-5.12802
								7700	-16.3371	-7.9731											7700	-15.1589	-5.11885
								7800	-16.3402	-7.93115											7800	-15.1476	-5.11225
								7900	-16.341	-7.9003											7900	-15.1375	-5.10162
								8000	-16.3323	-7.88537											8000	-15.1325	-5.08749
								8100	-16.3145	-7.89376											8100	-15.1314	-5.06823
								8200	-16.2912	-7.93246											8200	-15.1368	-5.04923
								8300	-16.2719	-7.98894											8300	-15.1506	-5.03002
								8400	-16.2539	-8.05705											8400	-15.1709	-5.00743
								8500	-16.2402	-8.12953											8500	-15.1945	-4.982
								8600	-16.2263	-8.20391											8600	-15.2227	-4.96062
								8700	-16.2098	-8.26496											8700	-15.2542	-4.94173
								8800	-16.1904	-8.30767											8800	-15.2849	-4.92913
								8900	-16.1735	-8.33854											8900	-15.3158	-4.92596
								9000	-16.149	-8.36465											9000	-15.3441	-4.92892
								9100	-16.1119	-8.39045											9100	-15.3708	-4.93396
								9200	-16.0772	-8.42293											9200	-15.3976	-4.94109
								9300	-16.0438	-8.45227											9300	-15.4241	-4.94786
								9400	-16.0172	-8.45802											9400	-15.4313	-4.99341
								9500	-16.0022	-8.49243											9500	-15.4335	-5.04937
								9600	-15.9984	-8.53942											9600	-15.4206	-5.04852
								9700	-16.0029	-8.56675											9700	-15.3947	-5.01599
								9800	-16.0128	-8.56474											9800	-15.3616	-4.99876
								9900	-16.0183	-8.57456											9900	-15.323	-4.95982
								10000	-15.9931	-8.57596											10000	-15.2822	-4.90594
								10100	-15.974	-8.56733											10100	-15.2394	-4.83097
								10200	-15.9537		-8.53078										10200	-15.6035		-4.0019
								10300	-15.9276		-8.45245										10300	-15.7239		-3.98615
								10400	-15.8808		-8.33458										10400	-15.8641		-3.95706
								10500	-15.7929		-8.17909										10500	-16.0038		-3.8993
								10600	-15.6309		-7.98972										10600	-16.1217		-3.86158
								10700	-15.4257		-7.74672										10700	-16.2401		-3.81217
								10800	-15.1834		-7.44856										10800	-16.3631		-3.7437
								10900	-14.847		-7.08552										10900	-16.499		-3.66646
								11000	-14.4444		-6.68196										11000	-16.6319		-3.57844
								11100	-13.9546		-6.22809										11100	-16.7562		-3.50569
								11200	-13.3703		-5.73415										11200	-16.8792		-3.44894
								11300	-12.6781		-5.20371										11300	-16.998		-3.40006
								11400	-11.8483		-4.66596										11400	-17.1236		-3.34848
								11500	-10.8594		-4.20546										11500	-17.2496		-3.28888
								11600	-9.80064		-3.742										11600	-17.3618		-3.20185
								11700	-8.75194		-3.27694										11700	-17.4702		-3.08463
								11800	-7.70392		-2.82505										11800	-17.5754		-2.92332
								11900	-6.57045		-2.40666										11900	-17.6793		-2.74069
								12000	-5.56387		-2.00977										12000	-17.7668		-2.5416
								12100	-4.64525		-1.68406										12100	-17.8327		-2.30879
								12200	-3.80674		-1.43124										12200	-17.8908		-2.0625
								12300	-3.06609		-1.23189										12300	-17.9561		-1.79865
								12400	-2.44656		-1.09041										12400	-18.0134		-1.53684
								12500	-1.94214		-1.03548										12500	-18.0586		-1.27803
								12600	-1.54326		-1.01805										12600	-18.0728		-1.03958
								12700	-1.27786		-1.00547										12700	-18.0832		-0.805222
								12800	-1.08156		-0.973953										12800	-18.0945		-0.615346
								12900	-0.918579		-0.984028										12900	-18.0944		-0.475027
								13000	-0.795397		-1.08272										13000	-18.0755		-0.376681
								13100	-0.630414		-1.2375										13100	-18.0522		-0.310615
								13200	-0.395374		-1.48883										13200	-18.0253		-0.24973
								13300	-0.114805		-1.7963										13300	-17.9892		-0.185556
								13400	0.181891		-2.17213										13400	-17.9503		-0.114814
								13500	0.524008		-2.59837										13500	-17.9131		-0.0499939
								13600	0.86249		-3.00235										13600	-17.8766		0.0282022
								13700	1.18462		-3.41551										13700	-17.8414		0.121279
								13800	1.41138		-3.90669										13800	-17.7701		0.236515
								13900	1.59041		-4.45166										13900	-17.6739		0.367155
								14000	1.79081		-5.02957										14000	-17.5507		0.529955
								14100	1.96093		-5.64057										14100	-17.4158		0.697588
								14200	2.02982		-6.26056										14200	-17.2639		0.839864
								14300	1.99702		-6.86244										14300	-17.0856		0.981056
								14400	1.89611		-7.44656										14400	-16.8723		1.14661
								14500	1.76131		-8.04227										14500	-16.6054		1.34113
								14600	1.5768		-8.60601										14600	-16.2732		1.56465
								14700	1.30301		-9.15269										14700	-15.8988		1.79665
								14800	0.935645		-9.69118										14800	-15.5027		2.0439
								14900	0.483084		-10.2948										14900	-15.0876		2.308
								15000	-0.0719605		-10.9483										15000	-14.6806		2.58417
								15100	-0.669743		-11.5725										15100	-14.2903		2.8513
								15200	-1.27967		-12.1841										15200	-13.8631		3.08733
								15300	-1.89931		-12.745										15300	-13.4241		3.31013
								15400	-2.58484		-13.2561										15400	-12.9815		3.52646
								15500	-3.31137		-13.7219										15500	-12.4976		3.74619
								15600	-4.06789		-14.1254										15600	-11.9606		3.95871
								15700	-4.82029		-14.5027										15700	-11.3891		4.15592
								15800	-5.55697		-14.8445										15800	-10.8294		4.32596
								15900	-6.28887		-15.1172										15900	-10.293		4.44888
								16000	-7.02816		-15.2978										16000	-9.76755		4.48544
								16100	-7.7933		-15.4131										16100	-9.21925		4.44419
								16200	-8.56675		-15.4468										16200	-8.64567		4.36579
								16300	-9.28525		-15.4158										16300	-8.07242		4.28131
								16400	-9.93464		-15.3416										16400	-7.52008		4.21
								16500	-10.556		-15.2405										16500	-7.00191		4.15639
								16600	-11.2		-15.0871										16600	-6.53219		4.10157
								16700	-11.8633		-14.8735										16700	-6.1134		4.04319
								16800	-12.5215		-14.6478										16800	-5.74229		3.99643
								16900	-13.1478		-14.4249										16900	-5.38498		3.92209
								17000	-13.7476		-14.1567										17000	-5.04502		3.81065
								17100	-14.2539		-13.7954										17100	-4.72758		3.67823
								17200	-14.7512		-13.3908										17200	-4.37987		3.51757
								17300	-15.2528		-12.9637										17300	-4.0091		3.34013
								17400	-15.7642		-12.5296										17400	-3.60042		3.13755
								17500	-16.2308		-12.0979										17500	-3.16194		2.91424
								17600	-16.6221		-11.6585										17600	-2.7478		2.65234
								17700	-16.9737		-11.205										17700	-2.38257		2.36813
								17800	-17.3122		-10.7486										17800	-2.06378		2.05906
								17900	-17.6481		-10.2812										17900	-1.74539		1.7374
								18000	-17.9841		-9.76628										18000	-1.44916		1.43667
								18100	-18.2962		-9.22389										18100	-1.21907		1.17185
								18200	-18.5615		-8.65217										18200	-1.05299		0.948956
								18300	-18.7562		-8.06079										18300	-0.963295		0.773935
								18400	-18.9113		-7.41286										18400	-0.956422		0.65192
								18500	-19.0229		-6.65583										18500	-1.01661		0.577591
								18600	-19.0986		-5.8666										18600	-1.1226		0.54775
								18700	-19.122		-5.09545										18700	-1.24781		0.558864
								18800	-19.1003		-4.34689										18800	-1.36725		0.574105
								18900	-19.0638		-3.59455										18900	-1.47767		0.569732
								19000	-19.0253		-2.90071										19000	-1.59473		0.554982
								19100	-18.9665		-2.22521										19100	-1.69123		0.545852
								19200	-18.8765		-1.59105										19200	-1.73653		0.496826
								19300	-18.7709		-1.1013										19300	-1.73224		0.416593
								19400	-18.665		-0.73773										19400	-1.7164		0.325111
								19500	-18.5651		-0.433036										19500	-1.70919		0.197316
								19600	-18.4613		-0.189095										19600	-1.71819		0.0342072
								19700	-18.3501		0.0319698										19700	-1.74731		-0.193891
								19800	-18.2563		0.188658										19800	-1.82183		-0.446021
								19900	-18.1769		0.305069										19900	-1.9447		-0.713479
								20000	-18.1144		0.393893										20000	-2.08656		-0.988859
								20100	-18.0657		0.45318										20100	-2.24223		-1.29452
								20200	-18.021		0.518353										20200	-2.39877		-1.62122
								20300	-5.4707			-3.45346									20300	-16.4814			0.574963
								20400	-5.39877			-3.46137									20400	-16.5062			0.53777
								20500	-5.3468			-3.46509									20500	-16.5293			0.497384
								20600	-5.32226			-3.45482									20600	-16.5488			0.455678
								20700	-5.31691			-3.42778									20700	-16.5559			0.439128
								20800	-5.29069			-3.39814									20800	-16.5585			0.430684
								20900	-5.26905			-3.38176									20900	-16.5636			0.430919
								21000	-5.27218			-3.38726									21000	-16.5567			0.443574
								21100	-5.31269			-3.41102									21100	-16.5472			0.434898
								21200	-5.39791			-3.45294									21200	-16.5452			0.45739
								21300	-5.50975			-3.49436									21300	-16.5432			0.457671
								21400	-5.62386			-3.55908									21400	-16.5438			0.457878
								21500	-5.73758			-3.65719									21500	-16.5438			0.458914
								21600	-5.8365			-3.77963									21600	-16.5414			0.459816
								21700	-5.91284			-3.91703									21700	-16.5424			0.457934
								21800	-5.99743			-4.05998									21800	-16.5473			0.450974
								21900	-6.1078			-4.20206									21900	-16.5479			0.449248
								22000	-6.22254			-4.34299									22000	-16.5524			0.446021
								22100	-6.32386			-4.47057									22100	-16.5546			0.444399
								22200	-6.3806			-4.57358									22200	-16.5588			0.442741
								22300	-6.409			-4.66093									22300	-16.5639			0.440907
								22400	-6.46438			-4.72									22400	-16.5674			0.438218
								22500	-6.53426			-4.75549									22500	-16.568			0.435024
								22600	-6.57641			-4.76498									22600	-16.5918			0.40665
								22700	-6.57502			-4.75423									22700	-16.5976			0.398816
								22800	-6.53755			-4.73202									22800	-16.5966			0.398591
								22900	-6.50347			-4.71232									22900	-16.5936			0.401055
								23000	-6.49093			-4.67957									23000	-16.581			0.411259
								23100	-6.48295			-4.63619									23100	-16.5584			0.432968
								23200	-6.47474			-4.58184									23200	-16.5022			0.492737
								23300	-6.43794			-4.51798									23300	-16.4495			0.550038
								23400	-6.39916			-4.47616									23400	-16.4031			0.602449
								23500	-6.3582			-4.44496									23500	-16.3626			0.64664
								23600	-6.31711			-4.4151									23600	-16.3297			0.682977
								23700	-6.30033			-4.39151									23700	-16.3287			0.682215
								23800	-6.31108			-4.38404									23800	-16.3156			0.70049
								23900	-6.31679			-4.3807									23900	-16.3038			0.716187
								24000	-6.31151			-4.38427									24000	-16.3033			0.717046
								24100	-6.30665			-4.3771									24100	-16.3187			0.697934
								24200	-6.30499			-4.37245									24200	-16.3466			0.665705
								24300	-6.33183			-4.38104									24300	-16.3801			0.629617
								24400	-6.37843			-4.39673									24400	-16.4016			0.606318
								24500	-6.41841			-4.4103									24500	-16.4137			0.594153
								24600	-6.44339			-4.40685									24600	-16.433			0.57268
								24700	-6.46774			-4.39962									24700	-16.4331			0.571583
								24800	-6.49171			-4.38967									24800	-16.4407			0.562375
								24900	-6.52641			-4.38836									24900	-16.4121			0.594645
								25000	-6.56555			-4.39423									25000	-16.3751			0.635122
								25100	-6.60476			-4.40212									25100	-16.3358			0.678725
								25200	-6.63843			-4.40501									25200	-16.2985			0.720908
								25300	-6.66558			-4.40456									25300	-16.2952			0.727641
								25400	-6.68122			-4.40549									25400	-16.3022			0.725296
								25500	-6.68931			-4.40698									25500	-16.3219			0.704963
								25600	-6.69492			-4.4065									25600	-16.3526			0.673848
								25700	-6.69356			-4.40916									25700	-16.3957			0.630519
								25800	-6.69468			-4.41423									25800	-16.4016			0.616571
								25900	-6.68948			-4.41735									25900	-16.4377			0.580925
								26000	-6.68645			-4.42421									26000	-16.4792			0.525571
								26100	-6.68583			-4.43109									26100	-16.5306			0.460742
								26200	-6.68517			-4.43845									26200	-16.5839			0.400715
								26300	-6.68236			-4.44942									26300	-16.6274			0.355752
								26400	-6.67658			-4.46011									26400	-16.6589			0.326914
								26500	-6.66388			-4.47218									26500	-16.6932			0.297509
								26600	-6.64699			-4.48602									26600	-16.7377			0.249214
								26700	-6.62623			-4.49965									26700	-16.7851			0.191918
								26800	-6.60513			-4.51378									26800	-16.8206			0.137002
								26900	-6.5842			-4.52718									26900	-16.8427			0.102891
								27000	-6.56554			-4.53858									27000	-16.8809			0.0630746
								27100	-6.55025			-4.54838									27100	-16.915			0.0336576
								27200	-6.5357			-4.55696									27200	-16.9417			0.0114482
								27300	-6.52309			-4.56319									27300	-16.9614			0.0100689
								27400	-6.5163			-4.56805									27400	-16.9696			0.0322182
								27500	-6.51322			-4.57237									27500	-16.9661			0.0505109
								27600	-6.51411			-4.57614									27600	-16.947			0.0648004
								27700	-6.51479			-4.57753									27700	-16.925			0.0600461
								27800	-6.52363			-4.573									27800	-16.905			0.0346105
								27900	-6.52454			-4.56698									27900	-16.8998			-0.000162335
								28000	-6.52862			-4.55527									28000	-16.8974			-0.0528251
								28100	-6.54238			-4.53947									28100	-16.9229			-0.109863
								28200	-6.55139			-4.52572									28200	-16.9705			-0.168979
								28300	-6.5616			-4.51018									28300	-17.0256			-0.227198
								28400	-6.57755			-4.49266									28400	-17.0868			-0.285344
								28500	-6.59524			-4.47666									28500	-17.1558			-0.352883
								28600	-6.61509			-4.46211									28600	-17.243			-0.435274
								28700	-6.64003			-4.45488									28700	-17.3413			-0.520122
								28800	-6.66447			-4.45383									28800	-17.4364			-0.59571
								28900	-6.68622			-4.45575									28900	-17.5214			-0.641324
								29000	-6.7033			-4.46394									29000	-17.6015			-0.678285
								29100	-6.71769			-4.47622									29100	-17.6754			-0.710255
								29200	-6.73546			-4.49474									29200	-17.7327			-0.730245
								29300	-6.76098			-4.51886									29300	-17.7757			-0.736455
								29400	-6.76036			-4.53174									29400	-17.8016			-0.741009
								29500	-6.75516			-4.54705									29500	-17.8331			-0.777996
								29600	-6.72419			-4.56378									29600	-17.8338			-0.824156
								29700	-6.66983			-4.56701									29700	-17.8468			-0.895096
								29800	-6.5993			-4.57285									29800	-17.8489			-0.942933
								29900	-6.50391			-4.56021									29900	-17.8396			-0.948756
								30000	-6.40855			-4.54051									30000	-17.8181			-0.930442
								30100	-6.32976			-4.5236									30100	-17.7906			-0.907953
								30200	-6.26838			-4.53571									30200	-17.7534			-0.880976
								30300	-6.25431			-4.54576									30300	-17.7061			-0.845511
								30400	-6.31055				-4.53794								30400	-17.3855				-1.32616
								30500	-6.46683				-4.5268								30500	-17.4641				-1.53846
								30600	-6.75731				-4.53767								30600	-17.5735				-1.79092
								30700	-7.19865				-4.55063								30700	-17.6958				-1.9892
								30800	-7.77879				-4.5385								30800	-17.8272				-2.18942
								30900	-8.50605				-4.47222								30900	-17.9587				-2.41532
								31000	-9.3111				-4.39984								31000	-18.087				-2.68859
								31100	-10.2106				-4.33947								31100	-18.195				-3.00777
								31200	-11.1604				-4.28677								31200	-18.2843				-3.34411
								31300	-12.0799				-4.23185								31300	-18.3533				-3.67933
								31400	-13.0024				-4.16261								31400	-18.4107				-4.00333
								31500	-13.9092				-4.0933								31500	-18.45				-4.32819
								31600	-14.7479				-4.00877								31600	-18.4542				-4.62
								31700	-15.4717				-3.89117								31700	-18.4371				-4.90258
								31800	-16.0673				-3.72686								31800	-18.4076				-5.20421
								31900	-16.5474				-3.47794								31900	-18.3736				-5.52091
								32000	-16.9127				-3.19867								32000	-18.351				-5.85573
								32100	-17.1672				-2.89912								32100	-18.3039				-6.17926
								32200	-17.3342				-2.58707								32200	-18.2437				-6.46496
								32300	-17.3974				-2.20262								32300	-18.1929				-6.70962
								32400	-17.3701				-1.74098								32400	-18.1367				-6.90052
								32500	-17.3297				-1.27222								32500	-18.0665				-6.96343
								32600	-17.2826				-0.778654								32600	-17.9892				-7.00806
								32700	-17.1847				-0.248729								32700	-17.9286				-7.05749
								32800	-17.0532				0.295822								32800	-17.8656				-7.11158
								32900	-16.8562				0.860932								32900	-17.8005				-7.16527
								33000	-16.5788				1.37174								33000	-17.7502				-7.2332
								33100	-16.2593				1.83287								33100	-17.7121				-7.31822
								33200	-15.93				2.26098								33200	-17.6718				-7.38319
								33300	-15.6399				2.64068								33300	-17.6513				-7.42401
								33400	-15.3411				3.01316								33400	-17.643				-7.51701
								33500	-15.0128				3.34389								33500	-17.6259				-7.64491
								33600	-14.6475				3.67586								33600	-17.5801				-7.74655
								33700	-14.235				4.0285								33700	-17.5466				-7.88751
								33800	-13.8009				4.36487								33800	-17.5069				-8.04518
								33900	-13.3501				4.67702								33900	-17.4443				-8.24401
								34000	-12.8203				4.92746								34000	-17.3881				-8.44024
								34100	-12.2111				5.13767								34100	-17.3204				-8.60082
								34200	-11.5071				5.33222								34200	-17.2531				-8.72646
								34300	-10.7805				5.51427								34300	-17.1635				-8.81518
								34400	-10.0518				5.67602								34400	-17.0538				-8.8292
								34500	-9.39085				5.77545								34500	-16.953				-8.80331
								34600	-8.75643				5.84927								34600	-16.8823				-8.80128
								34700	-8.15977				5.88102								34700	-16.8292				-8.73747
								34800	-7.60037				5.888								34800	-16.8016				-8.61474
								34900	-7.04049				5.89908								34900	-16.8051				-8.44027
								35000	-6.51685				5.85049								35000	-16.8514				-8.26006
								35100	-6.0408				5.73758								35100	-16.9155				-8.11303
								35200	-5.60982				5.578								35200	-16.9915				-7.94628
								35300	-5.15879				5.36789								35300	-17.0973				-7.77321
								35400	-4.66391				5.15173								35400	-17.2153				-7.6539
								35500	-4.19483				4.88511								35500	-17.3403				-7.49965
								35600	-3.73868				4.58868								35600	-17.4708				-7.34846
								35700	-3.26897				4.24768								35700	-17.6255				-7.2514
								35800	-2.76783				3.79043								35800	-17.7629				-7.19836
								35900	-2.21293				3.27165								35900	-17.8886				-7.16562
								36000	-1.63054				2.70167								36000	-18.0276				-7.10495
								36100	-1.06192				2.11281								36100	-18.1317				-7.00135
								36200	-0.531309				1.52726								36200	-18.2258				-6.89604
								36300	-0.096987				0.977034								36300	-18.315				-6.78806
								36400	0.209885				0.508443								36400	-18.4056				-6.71344
								36500	0.433724				0.11228								36500	-18.5124				-6.59326
								36600	0.572169				-0.160793								36600	-18.6253				-6.42518
								36700	0.647595				-0.350715								36700	-18.7372				-6.19258
								36800	0.699687				-0.492638								36800	-18.8297				-5.93012
								36900	0.767587				-0.64059								36900	-18.9094				-5.62131
								37000	0.793238				-0.70787								37000	-18.9761				-5.27528
								37100	0.822897				-0.765351								37100	-19.0245				-4.89959
								37200	0.818872				-0.812343								37200	-19.0606				-4.47119
								37300	0.858595				-0.87545								37300	-19.0814				-3.99054
								37400	0.870818				-0.92615								37400	-19.0967				-3.48884
								37500	0.866416				-1.0404								37500	-19.0936				-2.9987
								37600	0.888188				-1.23608								37600	-19.0498				-2.52563
								37700	0.955805				-1.5562								37700	-18.9394				-2.03576
								37800	1.07115				-1.99614								37800	-18.809				-1.57429
								37900	1.17306				-2.42797								37900	-18.6585				-1.1127
								38000	1.3042				-2.87962								38000	-18.4957				-0.669048
								38100	1.42191				-3.36392								38100	-18.3377				-0.290842
								38200	1.51234				-3.78635								38200	-18.1765				0.051143
								38300	1.57267				-4.08051								38300	-18.0052				0.371258
								38400	1.57802				-4.35456								38400	-17.8091				0.674652
								38500	1.55971				-4.62269								38500	-17.5836				0.982938
								38600	1.5336				-4.89182								38600	-17.3342				1.29146
								38700	1.52004				-5.21672								38700	-17.0881				1.61079
								38800	1.46855				-5.63622								38800	-16.8486				1.92133
								38900	1.41701				-6.01784								38900	-16.6035				2.2286
								39000	1.33765				-6.35184								39000	-16.3779				2.50615
								39100	1.27926				-6.7153								39100	-16.1447				2.75822
								39200	1.212				-7.02417								39200	-15.896				3.00989
								39300	1.15414				-7.2822								39300	-15.6558				3.26608
								39400	1.09078				-7.48928								39400	-15.4219				3.48621
								39500	1.0227				-7.76226								39500	-15.1757				3.68318
								39600	0.951075				-8.06371								39600	-14.9318				3.88492
								39700	0.869673				-8.39586								39700	-14.6885				4.09418
								39800	0.783275				-8.69651								39800	-14.448				4.27182
								39900	0.668828				-8.95545								39900	-14.1792				4.42778
								40000	0.546283				-9.25338								40000	-13.8932				4.5483
								40100	0.403788				-9.51489								40100	-13.6231				4.63264
								40200	0.25833				-9.67765								40200	-13.3221				4.71159
								40300	0.122569				-9.79419								40300	-13.0135				4.7962
								40400	-14.106					-4.94338							40400	-12.7184				4.8679
								40500	-13.6492					-4.8313							40500	-12.0892					-1.52498
								40600	-13.1806					-4.70464							40600	-12.0896					-1.52413
								40700	-12.7269					-4.57463							40700	-12.0898					-1.52322
								40800	-12.3049					-4.46529							40800	-12.0898					-1.52255
								40900	-11.9531					-4.36989							40900	-12.0901					-1.52179
								41000	-11.6936					-4.27769							41000	-12.0908					-1.52886
								41100	-11.5329					-4.21109							41100	-12.0905					-1.52488
								41200	-11.4307					-4.26281							41200	-12.0901					-1.5288
								41300	-11.3665					-4.35584							41300	-12.0892					-1.52805
								41400	-11.3235					-4.46891							41400	-12.0882					-1.52283
								41500	-11.3153					-4.59861							41500	-12.0889					-1.51666
								41600	-11.3635					-4.76091							41600	-12.0873					-1.50389
								41700	-11.4476					-4.98178							41700	-12.087					-1.491
								41800	-11.5227					-5.24144							41800	-12.084					-1.46623
								41900	-11.5602					-5.48851							41900	-12.0813					-1.44054
								42000	-11.6109					-5.75121							42000	-12.0794					-1.42341
								42100	-11.6483					-6.03296							42100	-12.0789					-1.40899
								42200	-11.6744					-6.30389							42200	-12.0772					-1.39324
								42300	-11.6946					-6.55338							42300	-12.0762					-1.37515
								42400	-11.7172					-6.77673							42400	-12.0716					-1.36232
								42500	-11.7463					-6.96342							42500	-12.0677					-1.35591
								42600	-11.7941					-7.11841							42600	-12.0684					-1.35369
								42700	-11.8767					-7.26376							42700	-12.0711					-1.35586
								42800	-12					-7.38818							42800	-12.0752					-1.36698
								42900	-12.1289					-7.48421							42900	-12.0817					-1.38078
								43000	-12.2618					-7.55966							43000	-12.0901					-1.39366
								43100	-12.4106					-7.61915							43100	-12.0981					-1.39697
								43200	-12.5439					-7.67609							43200	-12.1083					-1.40746
								43300	-12.6551					-7.70164							43300	-12.1199					-1.40714
								43400	-12.7465					-7.6938							43400	-12.1323					-1.39986
								43500	-12.8407					-7.66268							43500	-12.144					-1.39088
								43600	-12.932					-7.62988							43600	-12.1509					-1.3796
								43700	-12.9841					-7.63434							43700	-12.1567					-1.36517
								43800	-12.998					-7.64319							43800	-12.1604					-1.34893
								43900	-12.9849					-7.64432							43900	-12.1676					-1.35302
								44000	-12.9538					-7.65261							44000	-12.1808					-1.36717
								44100	-12.886					-7.64873							44100	-12.1919					-1.37607
								44200	-12.8181					-7.62052							44200	-12.1955					-1.37607
								44300	-12.7388					-7.60066							44300	-12.1972					-1.37946
								44400	-12.6535					-7.56978							44400	-12.2003					-1.40087
								44500	-12.5495					-7.54197							44500	-12.21					-1.42629
								44600	-12.4449					-7.53716							44600	-12.219					-1.44499
								44700	-12.3434					-7.53811							44700	-12.2209					-1.45702
								44800	-12.2467					-7.52615							44800	-12.2216					-1.44697
								44900	-12.168					-7.52018							44900	-12.2152					-1.43277
								45000	-12.1264					-7.51906							45000	-12.2072					-1.41304
								45100	-12.1212					-7.51239							45100	-12.2007					-1.39428
								45200	-12.1342					-7.48615							45200	-12.1986					-1.38229
								45300	-12.1687					-7.44894							45300	-12.197					-1.37507
								45400	-12.2228					-7.39162							45400	-12.1995					-1.36691
								45500	-12.2991					-7.33717							45500	-12.2027					-1.35513
								45600	-12.3866					-7.30587							45600	-12.203					-1.34432
								45700	-12.4672					-7.27325							45700	-12.2061					-1.32667
								45800	-12.5452					-7.22621							45800	-12.214					-1.32389
								45900	-12.6162					-7.18136							45900	-12.2197					-1.3341
								46000	-12.6697					-7.12935							46000	-12.2307					-1.35164
								46100	-12.7187					-7.07812							46100	-12.237					-1.36125
								46200	-12.7629					-7.04104							46200	-12.2437					-1.3782
								46300	-12.7791					-7.03231							46300	-12.2618					-1.40515
								46400	-12.777					-7.0261							46400	-12.2817					-1.43585
								46500	-12.771					-7.04137							46500	-12.2975					-1.45149
								46600	-12.7669					-7.0635							46600	-12.3133					-1.45997
								46700	-12.7726					-7.07734							46700	-12.3261					-1.45972
								46800	-12.7942					-7.09622							46800	-12.3403					-1.45665
								46900	-12.8101					-7.09965							46900	-12.3499					-1.47278
								47000	-12.8327					-7.11307							47000	-12.363					-1.48221
								47100	-12.8587					-7.12474							47100	-12.3802					-1.50717
								47200	-12.8755					-7.13144							47200	-12.3956					-1.52975
								47300	-12.8869					-7.13973							47300	-12.4079					-1.54443
								47400	-12.8798					-7.12698							47400	-12.4163					-1.54166
								47500	-12.8699					-7.10634							47500	-12.4187					-1.53482
								47600	-12.8378					-7.0868							47600	-12.4162					-1.52948
								47700	-12.8013					-7.05198							47700	-12.4131					-1.52216
								47800	-12.7664					-7.01843							47800	-12.4054					-1.52368
								47900	-12.7341					-6.98455							47900	-12.3969					-1.52654
								48000	-12.6978					-6.93654							48000	-12.3877					-1.51494
								48100	-12.6693					-6.8899							48100	-12.3766					-1.50075
								48200	-12.649					-6.84925							48200	-12.3735					-1.50007
								48300	-12.634					-6.80881							48300	-12.371					-1.49711
								48400	-12.6261					-6.77104							48400	-12.3656					-1.49741
								48500	-12.6378					-6.74893							48500	-12.363					-1.49908
								48600	-12.6582					-6.73024							48600	-12.3653					-1.51068
								48700	-12.6832					-6.71861							48700	-12.3649					-1.51906
								48800	-12.7155					-6.72125							48800	-12.3637					-1.53695
								48900	-12.7515					-6.73059							48900	-12.3604					-1.55672
								49000	-12.7914					-6.74772							49000	-12.3646					-1.57781
								49100	-12.8334					-6.77097							49100	-12.3708					-1.5986
								49200	-12.861					-6.78801							49200	-12.3736					-1.62529
								49300	-12.8726					-6.79724							49300	-12.3667					-1.63554
								49400	-12.8792					-6.8052							49400	-12.3607					-1.63899
								49500	-12.8771					-6.80918							49500	-12.3572					-1.64436
								49600	-12.8706					-6.82394							49600	-12.3517					-1.64454
								49700	-12.871					-6.82946							49700	-12.3487					-1.6535
								49800	-12.8709					-6.83063							49800	-12.3451					-1.66079
								49900	-12.8415					-6.80095							49900	-12.332					-1.64239
								50000	-12.8387					-6.7668							50000	-12.3207					-1.6176
								50100	-12.8418					-6.7453							50100	-12.3085					-1.59171
								50200	-12.8604					-6.75796							50200	-12.2989					-1.55259
								50300	-12.8957					-6.83109							50300	-12.2893					-1.50492
								50400	-12.9725					-6.92863							50400	-12.2836					-1.45816
								50500	-13.0751						-7.04876						50500	-12.2738					-1.40322
								50600	-13.2096						-7.16031						50600	-12.2286						-1.29663
								50700	-13.3531						-7.25977						50700	-12.2656						-1.39412
								50800	-13.5144						-7.32323						50800	-12.3062						-1.4867
								50900	-13.736						-7.33148						50900	-12.345						-1.60898
								51000	-13.9783						-7.34262						51000	-12.3962						-1.77492
								51100	-14.2215						-7.36365						51100	-12.4803						-1.95857
								51200	-14.4444						-7.40341						51200	-12.5829						-2.15589
								51300	-14.664						-7.46938						51300	-12.6951						-2.34896
								51400	-14.8724						-7.55086						51400	-12.794						-2.52342
								51500	-15.058						-7.65735						51500	-12.9092						-2.70133
								51600	-15.2396						-7.75634						51600	-13.0298						-2.86273
								51700	-15.4135						-7.83925						51700	-13.152						-2.96781
								51800	-15.6012						-7.91868						51800	-13.2942						-3.02931
								51900	-15.8023						-7.95768						51900	-13.4537						-3.07879
								52000	-16.0199						-7.95933						52000	-13.6242						-3.11708
								52100	-16.2465						-7.927						52100	-13.8134						-3.15877
								52200	-16.5093						-7.82978						52200	-14.0187						-3.21216
								52300	-16.795						-7.68955						52300	-14.2267						-3.28932
								52400	-17.0784						-7.47833						52400	-14.4283						-3.37444
								52500	-17.3563						-7.23468						52500	-14.6121						-3.44658
								52600	-17.6328						-6.89547						52600	-14.7735						-3.50741
								52700	-17.8818						-6.46696						52700	-14.9139						-3.54811
								52800	-18.1327						-5.94143						52800	-15.043						-3.57412
								52900	-18.3633						-5.41496						52900	-15.1488						-3.59967
								53000	-18.5411						-4.96442						53000	-15.2555						-3.61601
								53100	-18.6623						-4.57497						53100	-15.3569						-3.62018
								53200	-18.7307						-4.23686						53200	-15.442						-3.61288
								53300	-18.7654						-3.93215						53300	-15.5191						-3.59722
								53400	-18.7617						-3.66112						53400	-15.6064						-3.5741
								53500	-18.7363						-3.46512						53500	-15.7011						-3.54441
								53600	-18.72						-3.27061						53600	-15.7878						-3.48708
								53700	-18.6808						-3.0915						53700	-15.8749						-3.40888
								53800	-18.6435						-2.89982						53800	-15.9718						-3.3376
								53900	-18.5744						-2.62364						53900	-16.0587						-3.2929
								54000	-18.4761						-2.28093						54000	-16.1368						-3.24826
								54100	-18.3363						-1.87333						54100	-16.2083						-3.19451
								54200	-18.163						-1.41915						54200	-16.2737						-3.13802
								54300	-17.96						-0.958946						54300	-16.3242						-3.07379
								54400	-17.7436						-0.49697						54400	-16.3693						-3.00925
								54500	-17.5323						-0.0421087						54500	-16.3983						-2.95157
								54600	-17.3163						0.445461						54600	-16.4437						-2.87287
								54700	-17.0658						0.93879						54700	-16.4881						-2.79114
								54800	-16.7995						1.43855						54800	-16.5327						-2.6897
								54900	-16.5015						1.9015						54900	-16.5648						-2.60641
								55000	-16.1699						2.31546						55000	-16.5922						-2.53174
								55100	-15.8411						2.71046						55100	-16.6277						-2.46999
								55200	-15.5112						3.06754						55200	-16.6823						-2.41182
								55300	-15.1743						3.39423						55300	-16.7477						-2.36737
								55400	-14.8366						3.6641						55400	-16.8251						-2.28732
								55500	-14.4805						3.89865						55500	-16.8912						-2.1938
								55600	-14.1253						4.16943						55600	-16.943						-2.09243
								55700	-13.722						4.42627						55700	-16.9717						-1.97959
								55800	-13.2579						4.67721						55800	-17.0066						-1.86875
								55900	-12.6952						4.92213						55900	-17.034						-1.74644
								56000	-12.1014						5.18242						56000	-17.052						-1.6133
								56100	-11.4708						5.44941						56100	-17.051						-1.45463
								56200	-10.8105						5.64303						56200	-17.0443						-1.26693
								56300	-10.1197						5.77317						56300	-17.0404						-1.06421
								56400	-9.41851						5.83503						56400	-17.0367						-0.860161
								56500	-8.6759						5.86798						56500	-17.0386						-0.659363
								56600	-7.87156						5.85742						56600	-17.0708						-0.46103
								56700	-7.0372						5.80823						56700	-17.0871						-0.281235
								56800	-6.23177						5.71536						56800	-17.0931						-0.0761392
								56900	-5.42889						5.53668						56900	-17.0861						0.103256
								57000	-4.62431						5.24135						57000	-17.0727						0.30157
								57100	-3.85802						4.82562						57100	-17.0574						0.52377
								57200	-3.13442						4.33637						57200	-17.0384						0.754602
								57300	-2.44781						3.79243						57300	-17.0044						0.990759
								57400	-1.82391						3.22006						57400	-16.9371						1.26977
								57500	-1.27699						2.6736						57500	-16.8257						1.53017
								57600	-0.822963						2.16459						57600	-16.6898						1.77762
								57700	-0.434539						1.68444						57700	-16.5317						2.01866
								57800	-0.145526						1.28505						57800	-16.3727						2.23105
								57900	0.0736024						0.964318						57900	-16.1724						2.45921
								58000	0.197576						0.733606						58000	-15.9236						2.71142
								58100	0.283524						0.53641						58100	-15.6527						3.00032
								58200	0.343356						0.358982						58200	-15.3486						3.32604
								58300	0.397055						0.191609						58300	-15.0127						3.63423
								58400	0.435357						0.0375345						58400	-14.6383						3.91137
								58500	0.506942						-0.126874						58500	-14.2122						4.1633
								58600	0.576634						-0.301164						58600	-13.7187						4.40824
								58700	0.622742						-0.506451						58700	-13.1916						4.66112
								58800	0.672363						-0.767968						58800	-12.6468						4.91585
								58900	0.795414						-1.15112						58900	-12.1258						5.14377
								59000	0.944609						-1.62332						59000	-11.6164						5.35005
								59100	1.08671						-2.18342						59100	-11.0982						5.53484
								59200	1.20031						-2.77973						59200	-10.6104						5.69411
								59300	1.30152						-3.38604						59300	-10.104						5.82636
								59400	1.383						-3.9724						59400	-9.59199						5.9182
								59500	1.41315						-4.47775						59500	-9.11451						5.95659
								59600	1.41255						-4.87157						59600	-8.69158						5.93029
								59700	1.38433						-5.20144						59700	-8.28997						5.83291
								59800	1.32591						-5.52262						59800	-7.87364						5.72081
								59900	1.25514						-5.84818						59900	-7.46398						5.57949
								60000	1.17135						-6.1758						60000	-6.96945						5.37318
								60100	1.08691						-6.52291						60100	-6.47697						5.19091
								60200	1.02046						-6.85236						60200	-5.98904						4.99286
								60300	0.96514						-7.20873						60300	-5.51104						4.77395
								60400	0.878202						-7.50858						60400	-5.04599						4.56242
								60500	0.79457						-7.76956						60500	-4.58971						4.36717
								60600	-17.1285							-7.52267					60600	-4.15187						4.18447
								60700	-17.1551							-7.48986					60700	-17.9295							-7.5424
								60800	-17.1765							-7.45347					60800	-17.9759							-7.46245
								60900	-17.193							-7.42643					60900	-18.0216							-7.42405
								61000	-17.2073							-7.39789					61000	-18.0555							-7.44017
								61100	-17.2247							-7.37926					61100	-18.0685							-7.52245
								61200	-17.2366							-7.36184					61200	-18.0585							-7.61174
								61300	-17.2464							-7.34339					61300	-18.0445							-7.68681
								61400	-17.2512							-7.32251					61400	-18.0125							-7.72083
								61500	-17.2511							-7.29491					61500	-17.9555							-7.73504
								61600	-17.2498							-7.26308					61600	-17.8684							-7.70495
								61700	-17.2511							-7.22691					61700	-17.765							-7.66313
								61800	-17.2514							-7.19369					61800	-17.6529							-7.6043
								61900	-17.251							-7.16428					61900	-17.5364							-7.51038
								62000	-17.2518							-7.13785					62000	-17.415							-7.39339
								62100	-17.2557							-7.11216					62100	-17.2828							-7.25904
								62200	-17.2623							-7.08473					62200	-17.1721							-7.13007
								62300	-17.2725							-7.05438					62300	-17.0763							-6.99771
								62400	-17.2846							-7.02702					62400	-17.0017							-6.87263
								62500	-17.2984							-7.00653					62500	-16.9544							-6.76493
								62600	-17.3121							-6.99489					62600	-16.9348							-6.67989
								62700	-17.3238							-6.9887					62700	-16.9387							-6.61229
								62800	-17.3356							-6.98715					62800	-16.9639							-6.57323
								62900	-17.3459							-6.98922					62900	-17.0025							-6.56355
								63000	-17.3532							-6.98801					63000	-17.0567							-6.58326
								63100	-17.3621							-6.98508					63100	-17.1317							-6.61545
								63200	-17.3672							-6.98184					63200	-17.1847							-6.65983
								63300	-17.3735							-6.97459					63300	-17.2241							-6.68284
								63400	-17.3783							-6.97127					63400	-17.2706							-6.69048
								63500	-17.384							-6.96808					63500	-17.3149							-6.69503
								63600	-17.3875							-6.9683					63600	-17.3559							-6.70067
								63700	-17.3875							-6.97986					63700	-17.3986							-6.70818
								63800	-17.3861							-6.9967					63800	-17.4277							-6.72358
								63900	-17.3859							-7.01777					63900	-17.445							-6.75048
								64000	-17.3915							-7.03776					64000	-17.4421							-6.77027
								64100	-17.3965							-7.05361					64100	-17.4259							-6.76977
								64200	-17.3971							-7.07955					64200	-17.4033							-6.7426
								64300	-17.3927							-7.1175					64300	-17.3819							-6.67458
								64400	-17.3834							-7.17027					64400	-17.3451							-6.56834
								64500	-17.3685							-7.22997					64500	-17.297							-6.42127
								64600	-17.3559							-7.29601					64600	-17.2294							-6.25334
								64700	-17.3486							-7.37051					64700	-17.1557							-6.07979
								64800	-17.334							-7.45445					64800	-17.0638							-5.89824
								64900	-17.2899							-7.54393					64900	-16.9612							-5.69084
								65000	-17.2476							-7.62775					65000	-16.8622							-5.47394
								65100	-17.2165							-7.68547					65100	-16.7577							-5.24421
								65200	-17.1732							-7.74135					65200	-16.6676							-5.00753
								65300	-17.1343							-7.77542					65300	-16.5855							-4.77983
								65400	-17.105							-7.7915					65400	-16.5179							-4.5881
								65500	-17.086							-7.77792					65500	-16.4538							-4.45314
								65600	-17.077							-7.74534					65600	-16.381							-4.37786
								65700	-17.0772							-7.69736					65700	-16.2976							-4.34994
								65800	-17.108							-7.61938					65800	-16.1978							-4.35467
								65900	-17.1493							-7.52268					65900	-16.0934							-4.38096
								66000	-17.1881							-7.41048					66000	-15.9762							-4.40796
								66100	-17.2326							-7.28172					66100	-15.8483							-4.42493
								66200	-17.2765							-7.16199					66200	-15.716							-4.42393
								66300	-17.3284							-7.03136					66300	-15.5861							-4.39751
								66400	-17.3763							-6.91018					66400	-15.4297							-4.36386
								66500	-17.4207							-6.80552					66500	-15.3166							-4.3411
								66600	-17.464							-6.71218					66600	-15.2205							-4.34121
								66700	-17.4993							-6.63706					66700	-15.1141							-4.3677
								66800	-17.5072							-6.58609					66800	-15.0675							-4.39548
								66900	-17.5051							-6.54938					66900	-15.0493							-4.42915
								67000	-17.4992							-6.52446					67000	-15.0637							-4.48969
								67100	-17.483							-6.51378					67100	-15.1083							-4.57335
								67200	-17.455							-6.53064					67200	-15.1986							-4.68515
								67300	-17.4266							-6.55562					67300	-15.3026							-4.8426
								67400	-17.4077							-6.58047					67400	-15.4038							-5.04839
								67500	-17.3926							-6.62084					67500	-15.4937							-5.26035
								67600	-17.3787							-6.67266					67600	-15.5506							-5.4983
								67700	-17.3679							-6.72582					67700	-15.5924							-5.76399
								67800	-17.3587							-6.76861					67800	-15.558							-6.05781
								67900	-17.3474							-6.80456					67900	-15.4787							-6.35741
								68000	-17.3404							-6.83316					68000	-15.353							-6.64969
								68100	-17.3366							-6.86014					68100	-15.2035							-6.92367
								68200	-17.34							-6.87987					68200	-15.0334							-7.1931
								68300	-17.3512							-6.89538					68300	-14.8507							-7.44278
								68400	-17.354							-6.90857					68400	-14.6634							-7.67677
								68500	-17.3608							-6.91849					68500	-14.4798							-7.91994
								68600	-17.3639							-6.91992					68600	-14.3012							-8.16413
								68700	-17.3714							-6.91306					68700	-14.23							-8.3989
								68800	-17.378							-6.89634					68800	-14.1904							-8.60522
								68900	-17.3815							-6.87611					68900	-14.1636							-8.78329
								69000	-17.3839							-6.8533					69000	-14.1683							-8.92996
								69100	-17.3863							-6.82883					69100	-14.2009							-9.03286
								69200	-17.3891							-6.80371					69200	-14.2406							-9.09153
								69300	-17.3923							-6.7767					69300	-14.2876							-9.10976
								69400	-17.396							-6.74899					69400	-14.3292							-9.09571
								69500	-17.3997							-6.72446					69500	-14.3741							-9.05833
								69600	-17.4035							-6.70527					69600	-14.3837							-9.03709
								69700	-17.4073							-6.69288					69700	-14.3658							-9.00142
								69800	-17.4118							-6.68546					69800	-14.3368							-8.95468
								69900	-17.4196							-6.68128					69900	-14.285							-8.88996
								70000	-17.4297							-6.68315					70000	-14.2272							-8.82256
								70100	-17.4342							-6.70891					70100	-14.1865							-8.75243
								70200	-17.4222							-6.74175					70200	-14.1577							-8.68556
								70300	-17.416							-6.77497					70300	-14.1433							-8.61733
								70400	-17.4165							-6.78574					70400	-14.1397							-8.5654
								70500	-17.4236							-6.77353					70500	-14.1499							-8.53099
								70600	-17.4205							-6.75844					70600	-14.1691							-8.50623
								70700	-17.4266								-6.73688				70700	-14.1966							-8.48352
								70800	-17.443								-6.72303				70800	-14.0347								-8.40173
								70900	-17.4702								-6.69967				70900	-13.8666								-8.45946
								71000	-17.5184								-6.6602				71000	-13.6452								-8.51611
								71100	-17.6076								-6.59171				71100	-13.3847								-8.58578
								71200	-17.72								-6.45799				71200	-13.1024								-8.63962
								71300	-17.8468								-6.23433				71300	-12.7493								-8.67517
								71400	-17.9896								-5.95219				71400	-12.3151								-8.72821
								71500	-18.1532								-5.63063				71500	-11.8721								-8.78344
								71600	-18.3166								-5.24576				71600	-11.4214								-8.8338
								71700	-18.4614								-4.7638				71700	-10.972								-8.87418
								71800	-18.5661								-4.18448				71800	-10.5261								-8.90144
								71900	-18.6387								-3.56538				71900	-10.0949								-8.93134
								72000	-18.6867								-2.93114				72000	-9.74686								-8.9728
								72100	-18.6799								-2.2993				72100	-9.50356								-9.02397
								72200	-18.6453								-1.65571				72200	-9.28124								-9.09296
								72300	-18.5844								-1.01584				72300	-9.06005								-9.16913
								72400	-18.4637								-0.375337				72400	-8.83788								-9.26008
								72500	-18.2546								0.276266				72500	-8.61518								-9.35863
								72600	-17.9596								0.856688				72600	-8.35051								-9.44311
								72700	-17.6195								1.39862				72700	-8.04843								-9.53891
								72800	-17.2664								1.8821				72800	-7.71182								-9.63148
								72900	-16.927								2.30974				72900	-7.35305								-9.69632
								73000	-16.6381								2.67795				73000	-6.98348								-9.75048
								73100	-16.3443								3.01695				73100	-6.61702								-9.80378
								73200	-16.0227								3.36399				73200	-6.25796								-9.84893
								73300	-15.6719								3.67982				73300	-5.94445								-9.90217
								73400	-15.2579								3.95411				73400	-5.64621								-9.98291
								73500	-14.7929								4.22335				73500	-5.35555								-10.0785
								73600	-14.3078								4.50247				73600	-5.0697								-10.1781
								73700	-13.8438								4.76967				73700	-4.81141								-10.2807
								73800	-13.4084								5.01601				73800	-4.58822								-10.3842
								73900	-13.0366								5.20383				73900	-4.38093								-10.505
								74000	-12.7143								5.35195				74000	-4.2061								-10.6283
								74100	-12.3839								5.47487				74100	-3.98742								-10.7394
								74200	-12.0162								5.60028				74200	-3.70726								-10.8103
								74300	-11.6066								5.73074				74300	-3.38118								-10.8465
								74400	-11.1574								5.86157				74400	-3.04734								-10.8432
								74500	-10.6985								5.96281				74500	-2.73193								-10.8281
								74600	-10.2545								6.03731				74600	-2.34173								-10.7659
								74700	-9.83723								6.05662				74700	-1.97543								-10.6921
								74800	-9.40437								6.03723				74800	-1.62974								-10.5797
								74900	-8.91229								5.96897				74900	-1.30855								-10.4401
								75000	-8.38183								5.87033				75000	-1.03842								-10.2788
								75100	-7.79149								5.76734				75100	-0.800641								-10.0919
								75200	-7.17753								5.6711				75200	-0.638768								-9.94168
								75300	-6.56514								5.55937				75300	-0.499112								-9.78768
								75400	-5.93628								5.41321				75400	-0.344335								-9.63721
								75500	-5.30679								5.23678				75500	-0.146983								-9.44212
								75600	-4.75038								5.01342				75600	0.0440787								-9.20414
								75700	-4.26007								4.76658				75700	0.206667								-8.97282
								75800	-3.79698								4.51932				75800	0.330351								-8.75517
								75900	-3.3942								4.25773				75900	0.411069								-8.59637
								76000	-2.99172								3.97569				76000	0.507498								-8.37142
								76100	-2.56027								3.67571				76100	0.611013								-8.17294
								76200	-2.11836								3.34837				76200	0.702302								-7.97171
								76300	-1.70828								2.98017				76300	0.785688								-7.79242
								76400	-1.32896								2.55008				76400	0.858748								-7.62354
								76500	-0.971351								2.08424				76500	0.956098								-7.44368
								76600	-0.592589								1.60416				76600	1.09599								-7.17877
								76700	-0.207081								1.14797				76700	1.17424								-6.90653
								76800	0.164254								0.72425				76800	1.25039								-6.58753
								76900	0.494772								0.265151				76900	1.33751								-6.25837
								77000	0.77812								-0.23037				77000	1.41154								-5.89024
								77100	0.986089								-0.74825				77100	1.47232								-5.51827
								77200	1.14162								-1.27067				77200	1.51126								-5.18391
								77300	1.25673								-1.80201				77300	1.57475								-4.83919
								77400	1.37754								-2.32452				77400	1.65193								-4.52824
								77500	1.47146								-2.76658				77500	1.70369								-4.27083
								77600	1.50124								-3.20638				77600	1.70231								-4.08516
								77700	1.50365								-3.63272				77700	1.68018								-3.996
								77800	1.48049								-4.11448				77800	1.65357								-3.96061
								77900	1.43496								-4.59779				77900	1.63388								-3.9589
								78000	1.40484								-5.08464				78000	1.65638								-3.93801
								78100	1.35947								-5.55727				78100	1.65792								-4.00266
								78200	1.27196								-6.03236				78200	1.70437								-4.07693
								78300	1.11613								-6.53988				78300	1.77532								-4.1665
								78400	0.944063								-7.0781				78400	1.85768								-4.26709
								78500	0.752652								-7.60539				78500	1.94592								-4.33125
								78600	0.502452								-8.09625				78600	2.01432								-4.38197
								78700	0.235569								-8.56011				78700	2.0589								-4.39726
								78800	-0.0458184								-9.0127				78800	2.08828								-4.39336
								78900	-0.360411								-9.50205				78900	2.11745								-4.39002
								79000	-0.685411								-10.0043				79000	2.13653								-4.36431
								79100	-1.05426								-10.5008				79100	2.13944								-4.36106
								79200	-1.45692								-10.9506				79200	2.14057								-4.4452
								79300	-1.86478								-11.3764				79300	2.10013								-4.54954
								79400	-2.27053								-11.7456				79400	2.04044								-4.66122
								79500	-2.66837								-12.0708				79500	1.95887								-4.7723
								79600	-3.04288								-12.4242				79600	1.86255								-4.89571
								79700	-3.38662								-12.7589				79700	1.7445								-5.00127
								79800	-3.71115								-13.0627				79800	1.60379								-5.09488
								79900	-3.99445								-13.2514				79900	1.49817								-5.2013
								80000	-4.26689								-13.3778				80000	1.33051								-5.2641
								80100	-4.5535								-13.4706				80100	1.17584								-5.34885
								80200	-4.84781								-13.5551				80200	1.04878								-5.45898
								80300	-5.12796								-13.6508				80300	0.936932								-5.60195
								80400	-5.36113								-13.7257				80400	0.858296								-5.74484
								80500	-5.58871								-13.7742				80500	0.80596								-5.86954
								80600	-5.79513								-13.7887				80600	0.76545								-6.01114
								80700	-5.97411								-13.7818				80700	0.732405								-6.13337
								80800	-10.6453									-0.386795			80800	0.674701								-6.25079
								80900	-10.6441									-0.384315			80900	-16.5956									-6.72183
								81000	-10.643									-0.382934			81000	-16.5959									-6.72054
								81100	-10.6414									-0.382304			81100	-16.5973									-6.71807
								81200	-10.641									-0.384986			81200	-16.5972									-6.7174
								81300	-10.6411									-0.38768			81300	-16.5961									-6.71688
								81400	-10.6408									-0.390576			81400	-16.5964									-6.71625
								81500	-10.6455									-0.393694			81500	-16.5961									-6.71599
								81600	-10.6473									-0.396793			81600	-16.5942									-6.71164
								81700	-10.6468									-0.399318			81700	-16.5946									-6.70907
								81800	-10.6468									-0.400739			81800	-16.5923									-6.70917
								81900	-10.6422									-0.399853			81900	-16.5894									-6.71034
								82000	-10.6366									-0.400482			82000	-16.5861									-6.71135
								82100	-10.6271									-0.400924			82100	-16.5814									-6.71375
								82200	-10.6224									-0.396998			82200	-16.5755									-6.71898
								82300	-10.6148									-0.395172			82300	-16.5696									-6.72529
								82400	-10.6033									-0.39183			82400	-16.5635									-6.7326
								82500	-10.5922									-0.386969			82500	-16.5578									-6.73933
								82600	-10.5954									-0.389276			82600	-16.5534									-6.74467
								82700	-10.5982									-0.392853			82700	-16.5497									-6.74809
								82800	-10.6054									-0.399293			82800	-16.5473									-6.75083
								82900	-10.6107									-0.399791			82900	-16.5462									-6.75283
								83000	-10.6199									-0.403674			83000	-16.5437									-6.75573
								83100	-10.6349									-0.413155			83100	-16.5423									-6.75816
								83200	-10.6523									-0.420705			83200	-16.5447									-6.75797
								83300	-10.6683									-0.431598			83300	-16.5452									-6.75791
								83400	-10.6825									-0.445385			83400	-16.5477									-6.75703
								83500	-10.6933									-0.457052			83500	-16.5529									-6.7539
								83600	-10.702									-0.466181			83600	-16.5624									-6.75398
								83700	-10.7111									-0.476686			83700	-16.5817									-6.74813
								83800	-10.7175									-0.48615			83800	-16.6004									-6.74131
								83900	-10.7237									-0.497596			83900	-16.6163									-6.74687
								84000	-10.7263									-0.502223			84000	-16.6289									-6.74072
								84100	-10.7204									-0.505783			84100	-16.632									-6.72138
								84200	-10.7114									-0.509789			84200	-16.6194									-6.69515
								84300	-10.7086									-0.513673			84300	-16.6025									-6.65566
								84400	-10.7149									-0.512043			84400	-16.5863									-6.59944
								84500	-10.7166									-0.509403			84500	-16.5863									-6.52253
								84600	-10.7295									-0.503998			84600	-16.5928									-6.43319
								84700	-10.7456									-0.494109			84700	-16.5998									-6.31813
								84800	-10.7676									-0.487667			84800	-16.6086									-6.19689
								84900	-10.7866									-0.474159			84900	-16.6175									-6.06759
								85000	-10.8011									-0.464709			85000	-16.6257									-5.92245
								85100	-10.8025									-0.457143			85100	-16.645									-5.76382
								85200	-10.7968									-0.439777			85200	-16.6577									-5.63247
								85300	-10.7916									-0.428963			85300	-16.6891									-5.53251
								85400	-10.7819									-0.415032			85400	-16.7152									-5.46574
								85500	-10.7661									-0.393455			85500	-16.721									-5.41723
								85600	-10.7483									-0.375559			85600	-16.7106									-5.4009
								85700	-10.7336									-0.363112			85700	-16.6847									-5.38997
								85800	-10.7129									-0.352222			85800	-16.6442									-5.46444
								85900	-10.6839									-0.340121			85900	-16.5806									-5.57536
								86000	-10.6558									-0.324517			86000	-16.5036									-5.72538
								86100	-10.6313									-0.325655			86100	-16.4113									-5.91448
								86200	-10.6108									-0.324037			86200	-16.3121									-6.13075
								86300	-10.6007									-0.322836			86300	-16.2238									-6.36834
								86400	-10.6049									-0.327261			86400	-16.1507									-6.61918
								86500	-10.6059									-0.33476			86500	-16.1099									-6.87387
								86600	-10.614									-0.347362			86600	-16.0699									-7.1351
								86700	-10.6275									-0.366979			86700	-16.0269									-7.36207
								86800	-10.6382									-0.387695			86800	-15.9783									-7.57881
								86900	-10.6377									-0.3973			86900	-15.9298									-7.76904
								87000	-10.6364									-0.416603			87000	-15.8452									-7.9476
								87100	-10.6343									-0.431885			87100	-15.7746									-8.10461
								87200	-10.6316									-0.43784			87200	-15.6994									-8.2486
								87300	-10.6305									-0.445153			87300	-15.6317									-8.36506
								87400	-10.6279									-0.446921			87400	-15.5604									-8.44514
								87500	-10.6267									-0.44544			87500	-15.4852									-8.48746
								87600	-10.6341									-0.444459			87600	-15.4359									-8.4916
								87700	-10.6427									-0.438772			87700	-15.413									-8.48773
								87800	-10.6529									-0.429429			87800	-15.4113									-8.48302
								87900	-10.6632									-0.417448			87900	-15.4237									-8.45899
								88000	-10.6787									-0.40747			88000	-15.461									-8.44533
								88100	-10.695									-0.410031			88100	-15.5168									-8.44009
								88200	-10.7113									-0.405958			88200	-15.5997									-8.45575
								88300	-10.7308									-0.406181			88300	-15.6964									-8.51311
								88400	-10.7483									-0.410516			88400	-15.7986									-8.59797
								88500	-10.7539									-0.414187			88500	-15.9171									-8.74107
								88600	-10.7602									-0.421095			88600	-16.0242									-8.91482
								88700	-10.7624									-0.428533			88700	-16.1037									-9.1104
								88800	-10.7549									-0.435837			88800	-16.1501									-9.35461
								88900	-10.7387									-0.445805			88900	-16.1779									-9.62367
								89000	-10.7255									-0.469808			89000	-16.1842									-9.89726
								89100	-10.7005									-0.483118			89100	-16.2017									-10.1875
								89200	-10.6653									-0.495347			89200	-16.2182									-10.4482
								89300	-10.6345									-0.505641			89300	-16.2186									-10.7065
								89400	-10.611									-0.510087			89400	-16.2133									-10.9601
								89500	-10.5797									-0.498396			89500	-16.1581									-11.2364
								89600	-10.5544									-0.488492			89600	-16.0563									-11.5044
								89700	-10.5278									-0.481921			89700	-15.9426									-11.7716
								89800	-10.5121									-0.476883			89800	-15.7908									-12.0228
								89900	-10.4985									-0.471033			89900	-15.602									-12.2702
								90000	-10.4932									-0.467222			90000	-15.3746									-12.525
								90100	-10.4922									-0.462554			90100	-15.1157									-12.7778
								90200	-10.5029									-0.466879			90200	-14.8557									-13.0232
								90300	-10.5129									-0.466415	-0.432761		90300	-14.6133									-13.2534
								90400	-10.4756									-0.438544	-0.417098		90400	-14.4103									-13.4503
								90500	-10.4777										-0.430684		90500	-14.2489									-13.6323
								90600	-10.4823										-0.476389		90600	-14.1207									-13.7605
								90700	-10.5035										-0.521799		90700	-14.0334									-13.8428
								90800	-10.5444										-0.565067		90800	-13.9657									-13.891
								90900	-10.6009										-0.573217		90900	-13.9451									-13.8988
								91000	-10.66										-0.585625		91000	-14.7564										-13.153
								91100	-10.7942										-0.611081		91100	-14.7736										-13.1254
								91200	-10.9575										-0.671649		91200	-14.8167										-13.0752
								91300	-11.1763										-0.74225		91300	-14.8426										-13.0555
								91400	-11.499										-0.856573		91400	-14.8793										-13.0367
								91500	-11.8611										-0.960568		91500	-14.9203										-13.0032
								91600	-12.2551										-1.0629		91600	-14.951										-12.9772
								91700	-12.7014										-1.17865		91700	-14.966										-12.9632
								91800	-13.1603										-1.28861		91800	-15.0039										-12.9295
								91900	-13.6213										-1.40562		91900	-15.0387										-12.9007
								92000	-14.0984										-1.5585		92000	-15.0495										-12.9257
								92100	-14.5918										-1.74525		92100	-15.0194										-12.9669
								92200	-15.0875										-1.96311		92200	-14.9983										-12.9702
								92300	-15.5659										-2.2173		92300	-14.9515										-13.015
								92400	-16.0188										-2.47012		92400	-14.8964										-13.0612
								92500	-16.4898										-2.76598		92500	-14.8344										-13.0926
								92600	-16.8985										-3.11631		92600	-14.7739										-13.1228
								92700	-17.281										-3.48568		92700	-14.7019										-13.157
								92800	-17.6158										-3.87062		92800	-14.6525										-13.1878
								92900	-17.8995										-4.2572		92900	-14.6061										-13.2103
								93000	-18.1427										-4.66479		93000	-14.5652										-13.2455
								93100	-18.3642										-5.09575		93100	-14.5352										-13.2842
								93200	-18.5601										-5.51623		93200	-14.5347										-13.2808
								93300	-18.7206										-5.94342		93300	-14.5362										-13.2989
								93400	-18.8708										-6.3941		93400	-14.5566										-13.2834
								93500	-18.9544										-6.84234		93500	-14.5738										-13.2892
								93600	-18.9637										-7.28769		93600	-14.5894										-13.2749
								93700	-18.8695										-7.70742		93700	-14.5959										-13.2606
								93800	-18.7856										-8.09561		93800	-14.5871										-13.2449
								93900	-18.6942										-8.47015		93900	-14.5694										-13.2591
								94000	-18.596										-8.81891		94000	-14.5617										-13.2768
								94100	-18.4893										-9.1122		94100	-14.5738										-13.2635
								94200	-18.3721										-9.33172		94200	-14.6084										-13.2389
								94300	-18.2707										-9.47951		94300	-14.6403										-13.2367
								94400	-18.1644										-9.61138		94400	-14.6927										-13.2113
								94500	-18.0638										-9.75929		94500	-14.7645										-13.1696
								94600	-17.9738										-9.92814		94600	-14.8608										-13.1303
								94700	-17.8743										-10.0751		94700	-14.9636										-13.0944
								94800	-17.7648										-10.2143		94800	-15.0733										-13.0512
								94900	-17.6553										-10.3597		94900	-15.1808										-13.0071
								95000	-17.542										-10.5101		95000	-15.2906										-12.9542
								95100	-17.415										-10.6711		95100	-15.3844										-12.9058
								95200	-17.2858										-10.8334		95200	-15.4659										-12.8605
								95300	-17.1539										-11.0185		95300	-15.5369										-12.8242
								95400	-17.0164										-11.1704		95400	-15.5929										-12.801
								95500	-16.8811										-11.2932		95500	-15.6447										-12.7829
								95600	-16.7606										-11.3844		95600	-15.6766										-12.753
								95700	-16.6315										-11.4509		95700	-15.6874										-12.7493
								95800	-16.4916										-11.4975		95800	-15.6702										-12.772
								95900	-16.3564										-11.5135		95900	-15.6348										-12.7982
								96000	-16.2362										-11.4984		96000	-15.5962										-12.8139
								96100	-16.14										-11.4474		96100	-15.5487										-12.8192
								96200	-16.0716										-11.3615		96200	-15.4974										-12.8271
								96300	-16.0366										-11.2579		96300	-15.445										-12.8375
								96400	-16.0115										-11.1713		96400	-15.421										-12.8294
								96500	-15.993										-11.084		96500	-15.3881										-12.8177
								96600	-15.9791										-10.986		96600	-15.3571										-12.7925
								96700	-15.9739										-10.8791		96700	-15.3274										-12.7623
								96800	-15.9851										-10.7698		96800	-15.3023										-12.7245
								96900	-16.0066										-10.6214		96900	-15.2928										-12.6789
								97000	-16.0418										-10.4378		97000	-15.302										-12.6243
								97100	-16.0945										-10.2268		97100	-15.3344										-12.5528
								97200	-16.1574										-9.97928		97200	-15.3926										-12.4749
								97300	-16.2272										-9.7057		97300	-15.4865										-12.3899
								97400	-16.3213										-9.39937		97400	-15.593										-12.3113
								97500	-16.4493										-9.08014		97500	-15.698										-12.2338
								97600	-16.5891										-8.7815		97600	-15.7791										-12.1742
								97700	-16.7163										-8.51479		97700	-15.838										-12.1311
								97800	-16.8439										-8.28916		97800	-15.8548										-12.1103
								97900	-16.9653										-8.11346		97900	-15.8585										-12.0978
								98000	-17.0842										-7.96634		98000	-15.838										-12.098
								98100	-17.202										-7.83071		98100	-15.7988										-12.1104
								98200	-17.3263										-7.70933		98200	-15.754										-12.1434
								98300	-17.4469										-7.59859		98300	-15.6974										-12.1864
								98400	-17.5463										-7.48444		98400	-15.6484										-12.2285
								98500	-17.6327										-7.32526		98500	-15.6096										-12.288
								98600	-17.7386										-7.12409		98600	-15.5677										-12.3394
								98700	-17.8512										-6.88786		98700	-15.5273										-12.3888
								98800	-17.9492										-6.64586		98800	-15.4966										-12.4258
								98900	-18.0328										-6.39123		98900	-15.4793										-12.4522
								99000	-18.1015										-6.14234		99000	-15.4703										-12.4702
								99100	-18.1806										-5.89764		99100	-15.4692										-12.481
								99200	-18.2385										-5.61097		99200	-15.476										-12.4943
								99300	-18.3064										-5.32596		99300	-15.496										-12.4975
								99400	-18.3484										-5.04933		99400	-15.5062										-12.5034
								99500	-18.3683										-4.7984		99500	-15.51										-12.5
								99600	-18.3911										-4.5849		99600	-15.5124										-12.4885
								99700	-18.3895										-4.41197		99700	-15.5137										-12.4995
								99800	-18.3678										-4.25097		99800	-15.5212										-12.5152
								99900	-18.3525										-4.06564		99900	-15.5193										-12.5173
								100000	-18.3284										-3.87512		100000	-15.511										-12.504
								100100	-18.2818										-3.68196		100100	-15.4987										-12.4816
								100200	-18.2511										-3.48576		100200	-15.4948										-12.4399
								100300	-18.215										-3.2667		100300	-15.4897										-12.4154
								100400	-18.1827												100400	-15.4768										-12.4059
								100500	-18.1478												100500	-15.4456										-12.4123
																					100600	-15.3821										-12.4441
																					100700	-15.3048										-12.4947
																					100800	-15.2128										-12.5599
																					100900	-15.1063										-12.6288
																					101000	-14.9952										-12.6871
