# Supplementary material for: Motor thalamus supports striatum-driven reinforcement
Source: eLife. 2018 Oct 8;7:e34032. doi: 10.7554/eLife.34032 (PMC6181560; doi:10.7554/eLife.34032)
Supplement: Figure 4—source data 1. [file elife-34032-fig4-data1.xlsx]

## Sheet: Figure 4
Figure 4b				Figure 4c						Figure 4e				Figure 4f
time (min)	sal	casp			sal		casp			time (min)	D1+ MLR-	D1+			D1+ MLR-		D1+		MLR-
1	0	0		mouse	a	i	a	i		1	0	0		mouse	a	i	a	i	a	i
2	0	0		1	222	20	568	12		2	0	0		1	220	3	222	8	23	1
3	0	0		2	324	17	165	33		3	2	9		2	357	7	407	4	4	8
4	2	8		3	224	27	251	99		4	4	22		3	158	19	99	4	2	1
5	2	21		4	369	5	137	38		5	6	36		4	393	13	151	5	17	15
6	7	34		5	529	6	316	10		6	6	43		5	358	3	205	11	2	2
7	24	45								7	16	55		6	301	6	246	3	0	0
8	50	59								8	28	60
9	74	75								9	38	69
10	97	86								10	45	82
11	108	96								11	52	87
12	108	109								12	59	102
13	126	122								13	74	102
14	147	137								14	90	119
15	164	143								15	106	123
16	174	157								16	114	133
17	192	174								17	123	141
18	203	186								18	135	143
19	222	198								19	147	151
20	227	204								20	155	163
21	227	220								21	158	172
22	227	237								22	164	175
23	227	249								23	182	184
24	227	261								24	194	193
25	227	265								25	206	203
26	245	276								26	221	203
27	265	290								27	228	206
28	283	298								28	230	213
29	303	311								29	230	222
30	324	316								30	238	222
