# Supplementary material for: Motor thalamus supports striatum-driven reinforcement
Source: eLife. 2018 Oct 8;7:e34032. doi: 10.7554/eLife.34032 (PMC6181560; doi:10.7554/eLife.34032)
Supplement: Figure 5—source data 1. [file elife-34032-fig5-data1.xlsx]

## Sheet: Figure 5
Figure 5b				Figure 5c						Figure 5d										Figure 5e
time (min)	sal	mus			sal		mus							ex trace											ex trace														ex trace
1	0	2		mouse	a	i	a	i		mouse	sal	mus			saline		mus			sal					sal														mus
2	4	2		1	284	79	30	19		1	0.640065	0.596826		time (ms)	X (cm)	Y (cm)	X (cm)	Y (cm)		mouse	pre	laser	post			pre1		laser1		pre2		laser2		pre3		laser3				pre1		laser1		pre2		laser2		pre3
3	24	2		2	64	9	40	9		2	0.472343	0.622467		100	-12.6834	-9.62425	-5.27187	-11.2586		1	0.152156	0.47594	0.16722		time(ms)	X (cm)	Y (cm)	X (cm)	Y (cm)	X (cm)	Y (cm)	X (cm)	Y (cm)	X (cm)	Y (cm)	X (cm)	Y (cm)		time(ms)	X (cm)	Y (cm)	X (cm)	Y (cm)	X (cm)	Y (cm)	X (cm)	Y (cm)	X (cm)	Y (cm)
4	36	2		3	288	14	134	20		3	0.500256	0.635946		200	-12.729	-9.63434	-5.33265	-11.1107		2	0.178738	0.426302	0.148298		100	-10.373	-7.32001	-5.32882	-3.32786	3.22686	-6.75716	-8.48379	-9.32103	-0.876991	-16.0128	-11.5897	-13.1508		100	-8.06463	-9.2348	3.99828	3.18311	5.99418	-8.4851	-6.56059	-10.7056	-0.154581	-11.7775
5	49	3		4	298	85	116	15						300	-12.7887	-9.64482	-5.40316	-10.9534		3	0.111571	0.20532	0.161687		200	-10.4036	-7.33969	-5.32572	-2.31297	3.02098	-6.94528	-7.96324	-10.2228	-0.693056	-15.8087	-11.7681	-13.1588		200	-8.62482	-8.73477	4.17012	2.99817	5.87799	-8.48545	-6.86959	-10.3174	-0.141812	-11.5492
6	67	4		5	276	22	283	18						400	-12.8495	-9.65569	-5.4777	-10.7951		mus					300	-10.4417	-7.37523	-5.3267	-1.37711	2.84494	-7.08407	-7.50477	-11.068	-0.610775	-15.5643	-11.9649	-13.2102		300	-9.20577	-8.241	4.34971	2.81593	5.73299	-8.47766	-7.2122	-9.83729	-0.131956	-11.3567
7	76	9		6	233	34	10	8						500	-12.9042	-9.66723	-5.55247	-10.6409		1	0.102939	0.450426	0.125922		400	-10.4934	-7.40943	-5.31189	-0.606516	2.6986	-7.16543	-7.09342	-11.7812	-0.611568	-15.3383	-12.14	-13.2772		400	-9.78338	-7.76823	4.5365	2.63246	5.5898	-8.46258	-7.59642	-9.21115	-0.128887	-11.2064
8	79	9		7	367	38	225	15						600	-12.9492	-9.67972	-5.62521	-10.4934		2	0.114015	0.40407	0.172466		500	-10.5048	-7.4322	-5.28368	0.0139496	2.57922	-7.21826	-6.73681	-12.5237	-0.675511	-15.1269	-12.2977	-13.3256		500	-10.3391	-7.27814	4.70161	2.44492	5.42487	-8.45395	-8.01525	-8.37012	-0.126208	-11.114
9	97	11		8	307	54								700	-12.9829	-9.69343	-5.69468	-10.3538		3	0.0672136	0.234588	0.0777593		600	-10.4989	-7.44836	-5.19927	0.484344	2.49541	-7.2512	-6.5419	-13.261	-0.798775	-14.8857	-12.4261	-13.3762		600	-10.8063	-6.78217	4.87342	2.19881	5.24055	-8.45469	-8.4428	-7.35837	-0.127041	-11.0721
10	105	11												800	-13.0049	-9.70856	-5.76021	-10.223							700	-10.4601	-7.45715	-4.97151	0.837271	2.44914	-7.24828	-6.53384	-13.6975	-0.979518	-14.6395	-12.5401	-13.4355		700	-11.1436	-6.29164	5.02619	1.94726	5.05327	-8.46349	-8.83516	-6.26232	-0.104335	-11.0825
11	105	13												900	-13.0151	-9.72531	-5.82149	-10.1011							800	-10.4017	-7.44935	-4.63656	1.07766	2.39586	-7.26114	-6.61228	-13.9951	-1.2181	-14.3926	-12.5946	-13.4834		800	-11.389	-5.84177	5.18597	1.66146	4.8544	-8.47766	-9.18365	-5.1417	-0.0940938	-11.1296
12	117	24												1000	-13.0141	-9.74379	-5.87839	-9.98832							900	-10.3064	-7.44319	-4.27037	1.21452	2.35182	-7.28915	-6.74152	-14.1736	-1.52221	-14.1237	-12.6169	-13.5357		900	-11.5787	-5.45875	5.38006	1.32429	4.66062	-8.49438	-9.55316	-4.07316	-0.117763	-11.1722
13	132	28												1100	-13.0022	-9.76403	-5.93089	-9.88472							1000	-10.1676	-7.43669	-3.89848	1.27591	2.41112	-7.25119	-6.92894	-14.2479	-1.86963	-13.8371	-12.6163	-13.5772		1000	-11.6925	-5.1916	5.60529	0.926205	4.47575	-8.5002	-9.88868	-3.1151	-0.139789	-11.1996
14	135	35												1200	-12.9856	-9.7901	-5.98907	-9.7741							1100	-10.0127	-7.43795	-3.59456	1.29843	2.51055	-7.18626	-7.11514	-14.2554	-2.20458	-13.545	-12.5855	-13.5937		1100	-11.7535	-5.0564	5.82913	0.518602	4.29097	-8.52213	-10.1936	-2.1888	-0.144458	-11.2097
15	147	40												1300	-12.9685	-9.80926	-6.03834	-9.68143							1200	-9.83949	-7.44511	-3.32391	1.32405	2.6073	-7.16125	-7.30818	-14.2029	-2.47302	-13.2464	-12.5386	-13.5922		1200	-11.7572	-4.99851	6.03146	0.128868	4.12622	-8.58669	-10.4124	-1.23709	-0.163189	-11.2078
16	161	45												1400	-12.9959	-9.77807	-6.08755	-9.60147							1300	-9.64574	-7.45134	-3.10339	1.31219	2.68763	-7.1453	-7.48113	-14.1319	-2.68315	-12.9536	-12.4824	-13.5611		1300	-11.7096	-5.00327	6.16025	-0.207548	3.98563	-8.68621	-10.4877	-0.321717	-0.125051	-11.2358
17	175	50												1500	-12.989	-9.77459	-6.11959	-9.54379							1400	-9.41661	-7.47465	-2.85151	1.28012	2.76695	-7.11036	-7.70796	-14.0487	-2.86392	-12.6838	-12.4293	-13.5213		1400	-11.6536	-5.058	6.23197	-0.433	3.85411	-8.85788	-10.4045	0.527028	-0.0963733	-11.2479
18	177	56												1600	-12.9348	-9.75677	-6.13738	-9.52027							1500	-9.19766	-7.49033	-2.55193	1.23435	2.86458	-7.0697	-8.01188	-13.9666	-2.99642	-12.4516	-12.4006	-13.4801		1500	-11.6238	-5.11063	6.27074	-0.625065	3.66773	-9.10056	-10.1657	1.32995	-0.0549829	-11.2897
19	190	63												1700	-12.8084	-9.7979	-6.14739	-9.49121							1600	-9.04012	-7.51548	-2.20487	1.15762	2.95745	-7.02132	-8.35875	-13.8533	-3.10139	-12.2495	-12.3709	-13.4228		1600	-11.6086	-5.1089	6.26988	-0.792884	3.51582	-9.40218	-9.73909	2.09048	0.00452151	-11.3262
20	203	71												1800	-12.6445	-9.86037	-6.1505	-9.47095							1700	-8.86086	-7.53022	-1.79571	1.07089	3.03079	-6.98426	-8.70573	-13.6865	-3.17151	-12.0763	-12.3327	-13.3182		1700	-11.5934	-5.08352	6.26216	-0.981304	3.30852	-9.7738	-9.16547	2.83374	0.0486164	-11.3669
21	209	74												1900	-12.4745	-9.9205	-6.15274	-9.48143							1800	-8.70864	-7.54471	-1.29373	0.895352	3.01504	-6.89789	-9.02064	-13.4947	-3.20632	-11.9312	-12.3127	-13.1573		1800	-11.5795	-5.0489	6.26404	-1.21199	3.04522	-10.1728	-8.45076	3.49087	0.0778894	-11.3387
22	209	81												2000	-12.2655	-10.0564	-6.1454	-9.47033							1900	-8.57427	-7.57962	-0.785822	0.678895	2.97887	-6.73775	-9.31657	-13.3174	-3.19552	-11.819	-12.3372	-12.8826		1900	-11.5662	-4.99201	6.31175	-1.5446	2.74684	-10.5537	-7.53834	4.04952	0.0854677	-11.3002
23	221	85												2100	-12.0251	-10.2646	-6.14311	-9.44945							2000	-8.46779	-7.62341	-0.278562	0.439694	2.84417	-6.42454	-9.57189	-13.1126	-3.18555	-11.7439	-12.3601	-12.4695		2000	-11.5614	-4.93858	6.31644	-1.85084	2.40634	-10.8361	-6.41056	4.51074	0.0619004	-11.249
24	236	85												2200	-11.7479	-10.5627	-6.14511	-9.43866							2100	-8.40016	-7.66505	0.211202	0.195855	2.59627	-5.99199	-9.81288	-12.9263	-3.17764	-11.7104	-12.4072	-11.9836		2100	-11.5517	-4.92779	6.33604	-2.13041	2.00333	-11.0959	-5.12611	4.75403	0.00173424	-11.196
25	247	86												2300	-11.4101	-10.9791	-6.14768	-9.44445							2200	-8.34739	-7.71162	0.642242	-0.0605572	2.24576	-5.46384	-10.0194	-12.732	-3.17515	-11.6854	-12.449	-11.4448		2200	-11.5456	-4.91464	6.37041	-2.39821	1.52262	-11.3486	-3.80163	4.82514	-0.0621067	-11.1405
26	258	86												2400	-10.9442	-11.4169	-6.14306	-9.46523							2300	-8.3397	-7.73404	1.02657	-0.34033	1.80602	-4.84255	-10.2187	-12.5573	-3.14455	-11.7001	-12.4766	-10.8666		2300	-11.5587	-4.8566	6.37795	-2.58253	0.992473	-11.6143	-2.37755	4.83325	-0.148674	-11.1278
27	263	86												2500	-10.3581	-11.8826	-6.14519	-9.46273							2400	-8.33017	-7.75334	1.41666	-0.670241	1.28365	-4.16643	-10.4788	-12.3751	-3.07891	-11.7705	-12.4972	-10.2588		2400	-11.5523	-4.7487	6.37069	-2.79758	0.427272	-11.8601	-0.965558	4.82613	-0.274543	-11.13
28	263	86												2600	-9.72182	-12.3656	-6.14636	-9.46056							2500	-8.30088	-7.77492	1.83806	-1.01383	0.689183	-3.45996	-10.8538	-12.1509	-2.97929	-11.8805	-12.5217	-9.65045		2500	-11.4953	-4.56069	6.41459	-3.03606	-0.137213	-12.0817	0.377792	4.79753	-0.460076	-11.1679
29	274	86												2700	-9.07054	-12.8579	-6.1476	-9.45631							2600	-8.27078	-7.81724	2.32454	-1.36872	0.0715505	-2.72279	-11.2687	-11.822	-2.8638	-12.0516	-12.5506	-9.05658		2600	-11.3756	-4.29751	6.51784	-3.36814	-0.716912	-12.2885	1.60375	4.72077	-0.722576	-11.2322
30	276	92												2800	-8.3926	-13.3507	-6.14817	-9.45268							2700	-8.25423	-7.86865	2.80943	-1.79574	-0.574663	-2.01729	-11.6289	-11.4378	-2.76755	-12.2047	-12.5962	-8.4684		2700	-11.1735	-3.9359	6.57068	-3.77296	-1.23865	-12.4413	2.72712	4.55638	-1.04574	-11.3144
														2900	-7.70167	-13.8367	-6.14876	-9.44876							2800	-8.24925	-7.92727	3.254	-2.30075	-1.21578	-1.33365	-11.9354	-11.0307	-2.67567	-12.3337	-12.6349	-7.92186		2800	-10.8578	-3.45836	6.55628	-4.29036	-1.71306	-12.5481	3.63137	4.21654	-1.43567	-11.378
														3000	-7.02072	-14.2776	-6.14909	-9.44469							2900	-8.23456	-8.01646	3.5953	-2.92739	-1.80981	-0.690878	-12.1962	-10.6067	-2.61096	-12.4269	-12.6724	-7.36678		2900	-10.4419	-2.90718	6.44398	-4.925	-2.1121	-12.6111	4.28872	3.68804	-1.85657	-11.4507
														3100	-6.38003	-14.6677	-6.14932	-9.44022							3000	-8.22177	-8.1304	3.82954	-3.62699	-2.26325	-0.13674	-12.3958	-10.229	-2.55107	-12.4881	-12.7268	-6.75803		3000	-9.95407	-2.32364	6.25169	-5.62269	-2.4484	-12.6453	4.80712	2.99786	-2.29281	-11.5613
														3200	-5.82239	-14.9354	-6.14926	-9.43652							3100	-8.21735	-8.27055	3.95599	-4.32347	-2.65227	0.262129	-12.5661	-9.89718	-2.49761	-12.5208	-12.77	-6.14202		3100	-9.41347	-1.69294	5.97086	-6.30625	-2.7162	-12.6699	5.11895	2.1871	-2.75187	-11.691
														3300	-5.3924	-15.1119	-6.14976	-9.43421							3200	-8.21592	-8.42431	4.04866	-5.02221	-2.93539	0.52298	-12.7417	-9.57675	-2.4651	-12.5264	-12.7628	-5.51776		3200	-8.81402	-0.981442	5.61847	-6.95726	-2.90694	-12.684	5.29222	1.29251	-3.22374	-11.8308
														3400	-5.05691	-15.2393	-6.15026	-9.43379							3300	-8.2291	-8.57088	4.14122	-5.69439	-3.12019	0.728095	-12.9673	-9.22524	-2.4761	-12.5153	-12.7118	-4.89266		3300	-8.18506	-0.222222	5.20721	-7.60369	-3.05176	-12.7041	5.35826	0.346093	-3.68567	-11.9715
														3500	-4.73685	-15.341	-6.15051	-9.43342							3400	-8.24464	-8.69822	4.25144	-6.36134	-3.20961	0.866676	-13.2225	-8.81813	-2.52081	-12.5099	-12.6527	-4.2599		3400	-7.56037	0.537603	4.696	-8.24767	-3.1552	-12.7461	5.3481	-0.608191	-4.15451	-12.08
														3600	-4.49354	-15.394	-6.15065	-9.43392							3500	-8.25934	-8.78601	4.35274	-7.06787	-3.30183	0.925209	-13.4709	-8.26616	-2.58877	-12.5078	-12.5469	-3.64349		3500	-6.94371	1.2798	4.18165	-8.97046	-3.27858	-12.8009	5.28528	-1.62436	-4.56047	-12.1891
														3700	-4.3136	-15.4218	-6.15103	-9.43465							3600	-8.28855	-8.82678	4.40071	-7.81335	-3.40652	0.945021	-13.63	-7.52671	-2.65679	-12.4643	-12.3146	-2.97649		3600	-6.39035	1.94104	3.67312	-9.69028	-3.42218	-12.8732	5.22507	-2.67824	-4.8898	-12.2734
														3800	-4.21909	-15.4021	-6.15097	-9.43348							3700	-8.31502	-8.82249	4.39479	-8.58517	-3.52389	0.902346	-13.655	-6.70429	-2.75825	-12.4029	-11.9781	-2.22514		3700	-5.91048	2.50074	3.19377	-10.3823	-3.55293	-12.9623	5.08363	-3.76049	-5.18226	-12.3376
														3900	-4.16905	-15.3296	-6.15108	-9.43331							3800	-8.3438	-8.80451	4.33656	-9.38497	-3.7191	0.847143	-13.5431	-5.87882	-2.89574	-12.359	-11.5025	-1.46237		3800	-5.52784	2.95667	2.76071	-11.0259	-3.64414	-13.0459	4.967	-4.96219	-5.40968	-12.3537
														4000	-4.12626	-15.3576	-6.15133	-9.43146							3900	-8.36202	-8.79832	4.13941	-10.1621	-4.24217	0.785213	-13.3546	-5.09847	-3.06796	-12.3397	-10.9616	-0.697669		3900	-5.24383	3.29676	2.37981	-11.5488	-3.72063	-13.125	4.86731	-6.19337	-5.63209	-12.3581
														4100	-4.11281	-15.4096	-6.15176	-9.43055							4000	-8.38972	-8.7433	3.84978	-10.8781	-4.84794	0.659377	-13.1117	-4.38356	-3.2687	-12.3308	-10.2385	0.0702536		4000	-5.0564	3.50005	2.06463	-11.9061	-3.77114	-13.1915	4.70189	-7.46258	-5.82228	-12.3273
														4200	-4.13236	-15.4747	-6.15247	-9.43032							4100	-8.42147	-8.60478	3.38368	-11.5759	-5.54944	0.4574	-12.8787	-3.75322	-3.47419	-12.3441	-9.38103	0.743757		4100	-4.94755	3.62046	1.78631	-12.1699	-3.80554	-13.2674	4.46849	-8.68221	-5.95894	-12.3019
														4300	-4.13058	-15.5274	-6.15317	-9.43058							4200	-8.43619	-8.40572	2.78761	-12.2488	-6.34022	0.209176	-12.6316	-3.1408	-3.67889	-12.3853	-8.32156	1.25441		4200	-4.93206	3.67639	1.50054	-12.2592	-3.83002	-13.3204	4.07428	-9.77406	-6.03095	-12.3009
														4400	-4.15818	-15.4992	-6.15368	-9.43147							4300	-8.46935	-8.2085	2.15226	-12.9158	-7.19568	-0.0797717	-12.4197	-2.4949	-3.83889	-12.4955	-7.11066	1.54617		4300	-4.97407	3.68412	1.19385	-12.2882	-3.8451	-13.3636	3.36395	-10.5983	-6.09367	-12.2969
														4500	-4.19824	-15.4773	-6.1546	-9.43147							4400	-8.48513	-8.04076	1.44629	-13.5407	-8.08693	-0.428263	-12.1944	-1.78778	-3.95524	-12.6444	-5.83409	1.67773		4400	-5.05577	3.6262	0.813786	-12.2875	-3.86024	-13.3945	2.49532	-11.2253	-6.18879	-12.3096
														4600	-4.25383	-15.4545	-6.15499	-9.43044							4500	-8.51107	-7.90757	0.665614	-14.0912	-8.98207	-0.810848	-11.8836	-1.06783	-4.01769	-12.8302	-4.59944	1.64362		4500	-5.13793	3.54307	0.304584	-12.2154	-3.86911	-13.4127	1.51133	-11.6829	-6.27846	-12.2975
														4700	-4.33879	-15.4346	-6.15543	-9.42883							4600	-8.55859	-7.83976	-0.205493	-14.5524	-9.83845	-1.20157	-11.3834	-0.368388	-4.04683	-13.0263	-3.39008	1.48471		4600	-5.18377	3.51519	-0.241556	-12.1239	-3.93736	-13.4382	0.45439	-12.0216	-6.34261	-12.2181
														4800	-4.44646	-15.4141	-6.15605	-9.4287							4700	-8.61404	-7.82393	-1.25987	-14.9478	-10.6693	-1.61699	-10.7132	0.221531	-4.07617	-13.1593	-2.08289	1.12465		4700	-5.19344	3.51997	-0.912896	-12.077	-4.00383	-13.4439	-0.598921	-12.297	-6.40415	-12.0642
														4900	-4.57269	-15.379	-6.15632	-9.42799							4800	-8.67197	-7.88703	-2.42788	-15.1844	-11.4401	-2.04398	-9.89556	0.702919	-4.05641	-13.2189	-0.791638	0.611879		4800	-5.19388	3.52393	-1.64368	-12.0443	-4.0826	-13.4554	-1.73451	-12.4855	-6.45124	-11.8841
														5000	-4.71056	-15.2849	-6.15665	-9.42751							4900	-8.71668	-8.03965	-3.6751	-15.2418	-12.0732	-2.46355	-8.97942	1.03351	-4.058	-13.1976	0.336875	0.0368081		4900	-5.19307	3.5296	-2.37446	-12.0221	-4.13125	-13.4563	-2.88728	-12.5729	-6.51242	-11.7151
														5100	-4.84959	-15.2203	-6.15718	-9.42739							5000	-8.74625	-8.25417	-4.94518	-15.1555	-12.5163	-2.86856	-8.02028	1.22753	-4.08579	-13.1173	1.26825	-0.701587		5000	-5.20074	3.52942	-3.12417	-11.9383	-4.13522	-13.4476	-4.08776	-12.531	-6.587	-11.553
														5200	-4.98248	-15.1418	-6.15788	-9.42831							5100	-8.77428	-8.50343	-6.18739	-14.8493	-12.7881	-3.21176	-7.09132	1.38838	-4.18758	-12.949	2.02777	-1.60337		5100	-5.20468	3.53272	-3.84446	-11.8297	-4.09037	-13.4323	-5.33612	-12.3359	-6.65471	-11.3644
														5300	-5.08072	-15.0821	-6.15868	-9.43005							5200	-8.79963	-8.75808	-7.34284	-14.4315	-12.9487	-3.43939	-6.26613	1.53084	-4.38087	-12.6726	2.55219	-2.58342		5200	-5.20907	3.53387	-4.65315	-11.6823	-4.04422	-13.3979	-6.56441	-11.9056	-6.685	-11.0792
														5400	-5.13174	-15.0625	-6.1591	-9.43171							5300	-8.80958	-8.99923	-8.3686	-13.9532	-13.0625	-3.5265	-5.49057	1.67403	-4.59943	-12.3461	2.78007	-3.60902		5300	-5.20954	3.53443	-5.47166	-11.5517	-4.03078	-13.3447	-7.73041	-11.2104	-6.64801	-10.7064
														5500	-5.1731	-15.049	-6.15941	-9.43167							5400	-8.83344	-9.20102	-9.17011	-13.4696	-13.0675	-3.54946	-4.60694	1.77785	-4.84355	-11.9963	2.72692	-4.5714		5400	-5.20197	3.54187	-6.26381	-11.3833	-4.03976	-13.2576	-8.82521	-10.2845	-6.57439	-10.3032
														5600	-5.21508	-15.033	-6.15944	-9.43239							5500	-8.83532	-9.41278	-9.82976	-13.036	-13.0521	-3.515	-3.68122	1.83855	-5.17204	-11.5632	2.34339	-5.42798		5500	-5.2055	3.53707	-6.96908	-11.127	-4.08738	-13.1303	-9.81994	-9.17622	-6.46771	-9.88928
														5700	-5.2705	-15.0104	-6.15942	-9.43256							5600	-8.78986	-9.67998	-10.4318	-12.5894	-13.0322	-3.41242	-2.75462	1.80138	-5.60489	-11.09	1.67557	-6.07135		5600	-5.20996	3.5334	-7.63322	-10.771	-4.17383	-12.9682	-10.5761	-7.88354	-6.34368	-9.47542
														5800	-5.35202	-14.9744	-6.15932	-9.43231							5700	-8.67164	-10.0074	-10.9581	-12.1554	-13.0399	-3.28205	-1.80942	1.63682	-6.11117	-10.6169	0.826595	-6.44386		5700	-5.215	3.52916	-8.23556	-10.2791	-4.2837	-12.7869	-11.1274	-6.37282	-6.2146	-9.07179
														5900	-5.45616	-14.9444	-6.1467	-9.43378							5800	-8.50101	-10.3536	-11.3897	-11.741	-13.1402	-3.1375	-0.922857	1.29461	-6.64853	-10.1896	-0.187703	-6.56254		5800	-5.21935	3.52538	-8.75893	-9.65306	-4.4004	-12.5898	-11.3933	-4.77465	-6.08837	-8.6576
														6000	-5.57395	-14.9329	-6.13528	-9.43277							5900	-8.25474	-10.7599	-11.824	-11.283	-13.2802	-2.98091	-0.179923	0.817681	-7.1941	-9.80189	-1.31899	-6.4421		5900	-5.21836	3.52625	-9.20747	-8.94207	-4.53613	-12.3829	-11.3715	-3.13069	-5.97445	-8.20242
														6100	-5.70813	-14.9415	-6.13573	-9.43595							6000	-7.97071	-11.1065	-12.2375	-10.7572	-13.3757	-2.87305	0.407461	0.305324	-7.73153	-9.45751	-2.4891	-6.12557		6000	-5.2169	3.52483	-9.59661	-8.2035	-4.67104	-12.1682	-11.0383	-1.49165	-5.82389	-7.74218
														6200	-5.87612	-14.9215	-6.14566	-9.43896							6100	-7.62675	-11.4115	-12.6277	-10.1195	-13.4002	-2.76813	0.882966	-0.237754	-8.21658	-9.15476	-3.63628	-5.68331		6100	-5.21587	3.5246	-9.97924	-7.43191	-4.82157	-11.9595	-10.4686	0.122875	-5.62869	-7.24838
														6300	-6.08274	-14.874	-6.1654	-9.43976							6200	-7.26344	-11.6807	-12.9069	-9.34005	-13.3586	-2.67894	1.35392	-0.743918	-8.66838	-8.9291	-4.65558	-5.12574		6200	-5.22149	3.51998	-10.3725	-6.66567	-5.00495	-11.7576	-9.79324	1.62994	-5.36818	-6.7111
														6400	-6.31717	-14.8132	-6.19662	-9.43883							6300	-6.91761	-11.894	-13.026	-8.4277	-13.2351	-2.63279	1.84415	-1.26798	-9.06411	-8.78723	-5.6318	-4.45375		6300	-5.22639	3.51594	-10.7378	-5.92145	-5.20678	-11.579	-8.84376	3.01022	-5.05264	-6.0525
														6500	-6.56867	-14.719	-6.24263	-9.43109							6400	-6.55291	-12.1676	-12.9694	-7.3813	-13.0521	-2.6473	2.32615	-1.89672	-9.40817	-8.72397	-6.55187	-3.67515		6400	-5.23513	3.51192	-11.0769	-5.27901	-5.4172	-11.4277	-7.3774	4.16656	-4.67343	-5.30493
														6600	-6.85665	-14.5696	-6.29633	-9.4241							6500	-6.19687	-12.4595	-12.7617	-6.21921	-12.7986	-2.72873	2.83559	-2.63707	-9.67284	-8.70237	-7.40931	-2.82534		6500	-5.24	3.50696	-11.3755	-4.71608	-5.63474	-11.3129	-5.75893	4.92409	-4.18083	-4.43672
														6700	-7.21617	-14.3591	-6.3613	-9.4141							6600	-5.84218	-12.7758	-12.3485	-4.8562	-12.4909	-2.85383	3.41213	-3.50189	-9.86675	-8.72282	-7.99669	-1.9572		6600	-5.23344	3.51091	-11.5501	-4.18186	-5.84331	-11.2343	-4.12544	5.27493	-3.66208	-3.54243
														6800	-7.65653	-14.0185	-6.43407	-9.40079							6700	-5.50811	-13.1084	-11.7195	-3.48954	-12.1561	-3.03524	3.90417	-4.50165	-9.98751	-8.77207	-8.34737	-1.13488		6700	-5.22941	3.51503	-11.6692	-3.70913	-6.00768	-11.1834	-2.42529	5.45179	-3.15141	-2.66967
														6900	-8.1008	-13.6806	-6.51202	-9.38363							6800	-5.23289	-13.4673	-10.7912	-2.2019	-11.7791	-3.2734	4.26439	-5.6416	-10.0342	-8.84922	-8.4929	-0.287492		6800	-5.24165	3.50394	-11.7361	-3.284	-6.0954	-11.155	-0.768662	5.43233	-2.62237	-1.84289
														7000	-8.52884	-13.3207	-6.58393	-9.36919							6900	-5.00574	-13.8314	-9.52563	-1.03696	-11.3407	-3.54077	4.41168	-6.87165	-10.1062	-8.92659	-8.44605	0.454242		6900	-5.25362	3.49219	-11.7349	-2.87601	-6.11482	-11.14	0.770004	5.18799	-2.08343	-1.07409
														7100	-8.91198	-12.969	-6.64992	-9.35305							7000	-4.8316	-14.1925	-8.03014	-0.075628	-10.9112	-3.8036	4.24944	-8.13745	-10.1578	-9.01815	-8.16599	0.978032		7000	-5.26703	3.4853	-11.6865	-2.43665	-6.09469	-11.1515	2.12166	4.83381	-1.49565	-0.303652
														7200	-9.26239	-12.6136	-6.70847	-9.3386							7100	-4.74966	-14.5003	-6.30953	0.553234	-10.5103	-4.02756	3.72863	-9.3935	-10.197	-9.15347	-7.66961	1.39052		7100	-5.28062	3.48619	-11.5242	-1.93135	-6.06019	-11.1815	3.28964	4.34437	-0.893666	0.437241
														7300	-9.59309	-12.2472	-6.76303	-9.32024							7200	-4.75349	-14.7296	-4.47911	0.762734	-10.1844	-4.18929	2.99274	-10.651	-10.1951	-9.29719	-6.95725	1.67769		7200	-5.29974	3.48648	-11.3404	-1.38054	-6.02664	-11.2125	4.24294	3.76858	-0.305545	1.09197
														7400	-9.94122	-11.8647	-6.80649	-9.30491							7300	-4.79561	-14.9188	-2.63759	0.543226	-9.94983	-4.31393	2.0949	-11.8435	-10.1777	-9.45808	-6.06004	1.79194		7300	-5.3474	3.47016	-11.0452	-0.809401	-5.99765	-11.2234	4.95152	3.0684	0.227644	1.63078
														7500	-10.3083	-11.5064	-6.83921	-9.29218							7400	-4.85478	-15.0648	-0.865631	-0.120708	-9.76008	-4.40115	1.04465	-12.9586	-10.1949	-9.61682	-5.03964	1.81522		7400	-5.40577	3.46412	-10.6361	-0.173622	-5.99452	-11.2295	5.42542	2.23676	0.666837	2.005
														7600	-10.6681	-11.197	-6.85715	-9.28277							7500	-4.9099	-15.2718	0.731651	-1.13219	-9.69329	-4.43447	-0.246253	-13.8914	-10.2548	-9.78063	-3.96208	1.8006		7500	-5.44048	3.45725	-10.1444	0.591571	-5.99418	-11.2302	5.73302	1.30152	1.01004	2.23096
														7700	-11.0234	-10.9134	-6.85598	-9.27478							7600	-4.85596	-15.544	2.00929	-2.4173	-9.71776	-4.4045	-1.68353	-14.596	-10.3224	-9.98977	-2.83111	1.68621		7600	-5.43193	3.45561	-9.48859	1.45062	-5.99535	-11.2302	5.91174	0.30697	1.31072	2.34719
														7800	-11.3738	-10.6859	-6.85894	-9.27488							7700	-4.74259	-15.7463	3.00073	-3.93256	-9.8278	-4.3283	-3.24616	-15.0523	-10.3844	-10.2011	-1.61641	1.39694		7700	-5.35091	3.47241	-8.66981	2.31829	-5.99582	-11.2321	5.89321	-0.743283	1.43496	2.35862
														7900	-11.7075	-10.5399	-6.8648	-9.27008							7800	-4.63061	-15.8593	3.64695	-5.65422	-9.99658	-4.2192	-4.9107	-15.2315	-10.4204	-10.4487	-0.400568	0.836778		7800	-5.16388	3.53051	-7.78608	3.18209	-5.99615	-11.2334	5.76788	-1.9271	1.49149	2.31954
														8000	-12.0252	-10.4662	-6.84892	-9.27291							7900	-4.49097	-15.9079	3.8511	-7.36977	-10.2086	-4.08853	-6.65479	-14.9792	-10.4372	-10.6311	0.727999	0.127005		7900	-4.90127	3.59176	-6.83807	4.03185	-5.9954	-11.2349	5.58771	-3.17985	1.50591	2.24088
														8100	-12.2745	-10.4286	-6.84535	-9.27552							8000	-4.32131	-15.8041	3.70207	-9.09055	-10.3592	-3.975	-8.35994	-14.4183	-10.444	-10.8006	1.72324	-0.681528		8000	-4.59104	3.66562	-5.89883	4.72137	-5.9955	-11.2361	5.26968	-4.4176	1.48336	2.12935
														8200	-12.4704	-10.4125	-6.84169	-9.28045							8100	-4.15749	-15.571	3.21081	-10.7637	-10.5197	-3.89228	-9.90886	-13.5326	-10.4633	-10.9766	2.5838	-1.59007		8100	-4.24083	3.74992	-5.03742	5.3357	-5.99605	-11.2394	4.79178	-5.71108	1.42403	2.03562
														8300	-12.5977	-10.394	-6.84096	-9.28162							8200	-4.03624	-15.2409	2.45018	-12.3039	-10.6752	-3.85633	-11.1803	-12.2756	-10.527	-11.1599	3.2907	-2.55298		8200	-3.87524	3.86787	-4.17826	5.81247	-5.99751	-11.2391	4.20518	-7.1194	1.36685	1.99003
														8400	-12.6415	-10.4001	-6.84073	-9.28232							8300	-3.94388	-14.8582	1.47859	-13.6028	-10.7945	-3.83375	-12.1207	-10.7988	-10.6157	-11.3378	3.85638	-3.54915		8300	-3.4955	3.99028	-3.33315	6.03288	-6.00021	-11.2374	3.58753	-8.46213	1.37372	1.96955
														8500	-12.6245	-10.4051	-6.84067	-9.28254							8400	-3.86463	-14.4932	0.395551	-14.6034	-10.923	-3.83154	-12.8315	-9.16507	-10.7254	-11.5031	4.25549	-4.55108		8400	-3.07645	4.10223	-2.50983	6.04115	-5.99898	-11.2378	2.89277	-9.69524	1.37375	1.99007
														8600	-12.5825	-10.3935	-6.8363	-9.28546							8500	-3.80521	-14.1039	-0.856997	-15.2642	-11.0399	-3.89361	-13.0889	-7.4672	-10.802	-11.6752	4.45326	-5.53854		8500	-2.6044	4.18392	-1.69912	5.87081	-5.9853	-11.2439	2.05534	-10.8256	1.38065	2.01372
														8700	-12.5292	-10.4516	-6.83661	-9.28414							8600	-3.7916	-13.7141	-2.23788	-15.5442	-11.1625	-3.9664	-12.926	-5.73554	-10.8662	-11.8862	4.54362	-6.49749		8600	-2.09058	4.2585	-0.871363	5.50099	-5.9696	-11.251	1.08081	-11.7888	1.36468	2.02729
														8800	-12.3934	-10.4854	-6.83713	-9.28244							8700	-3.83204	-13.3579	-3.66822	-15.581	-11.2593	-4.05389	-12.3936	-4.00868	-10.9073	-12.1007	4.53723	-7.40672		8700	-1.54178	4.29528	-0.0815643	4.88052	-5.96133	-11.2542	-0.0658966	-12.4314	1.35203	2.03595
														8900	-12.1399	-10.5567	-6.83443	-9.2847							8800	-3.92205	-13.0786	-5.07972	-15.1908	-11.343	-4.16764	-11.5372	-2.4516	-10.9482	-12.3286	4.43769	-8.25665		8800	-1.00263	4.30561	0.716626	4.08235	-5.96095	-11.2541	-1.29221	-12.6853	1.3427	2.05259
														9000	-11.8561	-10.6476	-6.83017	-9.28814							8900	-4.02881	-12.8206	-6.50557	-14.4623	-11.4289	-4.26652	-10.2601	-1.10055	-11.0106	-12.5698	4.2511	-9.13936		8900	-0.492111	4.33619	1.52324	3.14908	-5.96798	-11.251	-2.59759	-12.6343	1.37457	2.03272
														9100	-11.5428	-10.722	-6.83909	-9.28379							9000	-4.14487	-12.5347	-7.90285	-13.4524	-11.5666	-4.3042	-8.73022	-0.015449	-11.0452	-12.815	3.97288	-10.0656		9000	-0.0142309	4.35928	2.34591	2.14037	-5.9836	-11.2442	-3.96527	-12.3375	1.38526	2.05464
														9200	-11.2363	-10.8063	-6.85794	-9.25907							9100	-4.25615	-12.1517	-9.1118	-12.2297	-11.7117	-4.30391	-7.07248	0.723782	-11.0845	-12.9997	3.55795	-10.9493		9100	0.428721	4.32895	3.10227	1.02619	-6.00631	-11.2347	-5.27429	-11.8361	1.40968	2.05337
														9300	-10.9395	-10.9032	-6.8724	-9.241							9200	-4.40566	-11.7053	-10.1105	-10.5341	-11.7909	-4.35376	-5.23739	1.04163	-11.0898	-13.1534	2.97265	-11.8184		9200	0.845291	4.26174	3.75236	-0.237975	-6.03248	-11.2243	-6.53778	-11.127	1.42653	2.06445
														9400	-10.669	-10.9896	-6.86772	-9.24322							9300	-4.52698	-11.2383	-10.8491	-8.99455	-11.8176	-4.43017	-3.43083	1.03279	-11.0822	-13.2567	2.17883	-12.6494		9300	1.26253	4.15519	4.35612	-1.56658	-6.06325	-11.2122	-7.76876	-10.2422	1.45064	2.08645
														9500	-10.4347	-11.0399	-6.85798	-9.27875							9400	-4.63333	-10.7075	-11.2249	-7.23141	-11.7644	-4.54932	-1.66457	0.51224	-11.0663	-13.2887	1.2019	-13.3757		9400	1.66567	4.0395	4.86952	-2.96856	-6.09854	-11.2003	-8.78417	-9.19084	1.4835	2.14937
														9600	-10.2844	-11.0574	-6.84104	-9.35368							9500	-4.70781	-10.1051	-11.1223	-5.43361	-11.6067	-4.73126	-0.0767758	-0.650935	-11.0625	-13.323	0.0222056	-14.0112		9500	2.08484	3.91026	5.24236	-4.34688	-6.11658	-11.1896	-9.65669	-7.91214	1.54675	2.21545
														9700	-10.2158	-11.0285	-6.84578	-9.42116							9600	-4.80853	-9.4126	-10.6775	-3.79074	-11.3776	-4.9969	1.24396	-1.92814	-11.0687	-13.3194	-1.35463	-14.5353		9600	2.50111	3.77633	5.51224	-5.67959	-6.11132	-11.204	-10.3057	-6.46095	1.60907	2.25885
														9800	-10.2347	-10.9516	-6.82702	-9.48178							9700	-4.90152	-8.5723	-9.93694	-2.27575	-11.0799	-5.41772	2.24232	-3.33394	-11.0882	-13.2684	-2.88825	-14.7411		9700	2.89298	3.67846	5.61125	-6.92238	-6.0956	-11.305	-10.7346	-5.03407	1.57604	2.2551
														9900	-10.3269	-10.8355	-6.78728	-9.52037							9800	-5.00852	-7.60381	-8.98766	-0.93573	-10.7027	-5.99229	2.91885	-4.86934	-11.1269	-13.2406	-4.54727	-14.7522		9800	3.23364	3.5717	5.44517	-8.03572	-6.08567	-11.3286	-10.9417	-3.64151	1.52085	2.22501
														10000	-10.4674	-10.6714	-6.70607	-9.53329							9900	-5.10485	-6.56902	-7.8476	0.19636	-10.2183	-6.6621	3.26232	-6.50165	-11.1778	-13.2061	-6.29515	-14.4821		9900	3.49342	3.48734	5.08466	-9.00263	-6.1103	-11.2782	-10.9878	-2.24912	1.4222	2.16575
														10100	-10.592	-10.4623	-6.58004	-9.508							10000	-5.16944	-5.49241	-6.48672	0.985349	-9.66085	-7.52161	3.35135	-8.29008	-11.3013	-13.1839	-7.97301	-13.8215		10000	3.70344	3.39241	4.60607	-9.857	-6.19557	-11.1782	-10.9176	-0.899279	1.27385	2.06808
														10200	-10.6836	-10.2291	-6.42717	-9.43344							10100	-5.26461	-4.40898	-5.05099	1.50483	-9.05769	-8.41581	3.22485	-9.84185	-11.4407	-13.171	-9.49226	-12.8005		10100	3.86132	3.27958	3.99541	-10.532	-6.33858	-10.9855	-10.6847	0.267123	1.07761	1.958
														10300	-10.7793	-9.97943	-6.24892	-9.30327
														10400	-10.9068	-9.76997	-6.02008	-9.13948
														10500	-11.0523	-9.58671	-5.74632	-8.95914
														10600	-11.211	-9.43228	-5.4317	-8.78514
														10700	-11.368	-9.31226	-5.06592	-8.61187
														10800	-11.4842	-9.19101	-4.62547	-8.50165
														10900	-11.6068	-9.11052	-4.12626	-8.43593
														11000	-11.7273	-9.07302	-3.65658	-8.41101
														11100	-11.8295	-9.10017	-3.2284	-8.42137
														11200	-11.8942	-9.15163	-2.80945	-8.46723
														11300	-11.8804	-9.19953	-2.42448	-8.60668
														11400	-11.8281	-9.21468	-2.0784	-8.7925
														11500	-11.7668	-9.17968	-1.81303	-9.01465
														11600	-11.7013	-9.09682	-1.6157	-9.27149
														11700	-11.5752	-8.98597	-1.49993	-9.52722
														11800	-11.4008	-8.86531	-1.42426	-9.77005
														11900	-11.1747	-8.73306	-1.40123	-9.99643
														12000	-10.8972	-8.59146	-1.41373	-10.1698
														12100	-10.5939	-8.45463	-1.45601	-10.2908
														12200	-10.2971	-8.32936	-1.5191	-10.3672
														12300	-9.96666	-8.22802	-1.59001	-10.4074
														12400	-9.67071	-8.14732	-1.65227	-10.4417
														12500	-9.42491	-8.07623	-1.70472	-10.4722
														12600	-9.24606	-8.01507	-1.69905	-10.5389
														12700	-9.12966	-7.97959	-1.6566	-10.5825
														12800	-9.07493	-7.98448	-1.64058	-10.5819
														12900	-9.06758	-8.03018	-1.63758	-10.511
														13000	-9.11635	-8.09485	-1.67515	-10.3857
														13100	-9.16964	-8.19758	-1.76074	-10.2055
														13200	-9.19057	-8.28372	-1.90378	-9.98241
														13300	-9.21929	-8.34919	-2.08845	-9.72822
														13400	-9.29922	-8.39083	-2.27915	-9.45698
														13500	-9.44882	-8.45101	-2.46252	-9.21032
														13600	-9.58164	-8.50422	-2.6386	-8.97313
														13700	-9.64386	-8.60783	-2.77485	-8.73753
														13800	-9.64129	-8.67322	-2.84209	-8.49928
														13900	-9.57297	-8.6834	-2.81115	-8.23957
														14000	-9.40305	-8.62651	-2.68805	-7.94369
														14100	-9.11084	-8.47388	-2.42899	-7.62342
														14200	-8.63462	-8.17831	-1.9736	-7.29601
														14300	-7.99435	-7.76684	-1.43721	-6.96956
														14400	-7.29182	-7.2376	-0.82603	-6.65744
														14500	-6.51626	-6.61175	-0.150845	-6.35692
														14600	-5.66891	-5.93215	0.56874	-6.04839
														14700	-4.76556	-5.24654	1.35298	-5.70013
														14800	-3.8285	-4.5508	2.11203	-5.34659
														14900	-2.90091	-3.92249	2.81908	-5.01603
														15000	-2.04993	-3.35068	3.42676	-4.72275
														15100	-1.27362	-2.84001	3.93099	-4.47703
														15200	-0.665675	-2.34927	4.30486	-4.29382
														15300	-0.208113	-1.90373	4.57067	-4.16788
														15400	0.0697655	-1.53284	4.77362	-4.10445
														15500	0.184596	-1.2552	4.87346	-4.09144
														15600	0.209242	-1.01525	4.89937	-4.11592
														15700	0.116337	-0.803622	4.88494	-4.16466
														15800	-0.086091	-0.598557	4.82156	-4.22839
														15900	-0.387538	-0.359732	4.71896	-4.25704
														16000	-0.744692	-0.0619494	4.66911	-4.28251
														16100	-1.14518	0.282183	4.64963	-4.30401
														16200	-1.61849	0.614071	4.63466	-4.3229
														16300	-2.15819	0.896407	4.61834	-4.34188
														16400	-2.72802	1.13706	4.60408	-4.3606
														16500	-3.29609	1.35479	4.58922	-4.37959
														16600	-3.86084	1.52261	4.57708	-4.39505
														16700	-4.45467	1.60357	4.5683	-4.4073
														16800	-5.0733	1.6097	4.56376	-4.41496
														16900	-5.68161	1.52027	4.56344	-4.41837
														17000	-6.30302	1.37877	4.56739	-4.41678
														17100	-6.92922	1.21805	4.57475	-4.41126
														17200	-7.53248	1.04475	4.58474	-4.40236
														17300	-8.07063	0.837551	4.59588	-4.39194
														17400	-8.53187	0.618287	4.60508	-4.38841
														17500	-8.92749	0.41588	4.60835	-4.38714
														17600	-9.28377	0.273096	4.6046	-4.38899
														17700	-9.56044	0.17986	4.60151	-4.39206
														17800	-9.79847	0.113893	4.59582	-4.39538
														17900	-10.0256	0.0809381	4.59873	-4.39458
														18000	-10.2677	0.0447721	4.60772	-4.39086
														18100	-10.5313	-0.0143985	4.6225	-4.38504
														18200	-10.8444	-0.0629858	4.64278	-4.37571
														18300	-11.0816	-0.125522	4.66716	-4.36481
														18400	-11.2063	-0.181188	4.69462	-4.35264
														18500	-11.2423	-0.237952	4.74792	-4.33252
														18600	-11.1941	-0.311256	4.80049	-4.31328
														18700	-11.1407	-0.448554	4.84914	-4.30102
														18800	-11.0224	-0.616609	4.87661	-4.3024
														18900	-10.8397	-0.793869	4.86057	-4.35664
														19000	-10.6372	-0.958951	4.81488	-4.42158
														19100	-10.3956	-1.13935	4.75004	-4.44691
														19200	-10.0849	-1.28398	4.6887	-4.43684
														19300	-9.76418	-1.39513	4.63032	-4.35793
														19400	-9.45728	-1.47448	4.58866	-4.22469
														19500	-9.1909	-1.51098	4.55663	-4.01734
														19600	-8.95732	-1.51646	4.54171	-3.75725
														19700	-8.73357	-1.50972	4.51673	-3.34797
														19800	-8.61467	-1.48314	4.51623	-2.84303
														19900	-8.5855	-1.47079	4.5501	-2.29425
														20000	-8.61422	-1.4573	4.54066	-1.70792
														20100	-8.68949	-1.4071	4.47135	-1.05837
														20200	-8.79797	-1.35349	4.29815	-0.312647
														20300	-8.84719	-1.31833	4.11897	0.425322
														20400	-8.83328	-1.31084	3.89525	1.13525
														20500	-8.81217	-1.31254	3.59156	1.82154
														20600	-8.80547	-1.29205	3.16132	2.46642
														20700	-8.83929	-1.29183	2.52841	2.99279
														20800	-8.85632	-1.30406	1.76963	3.34598
														20900	-8.8765	-1.31198	0.952132	3.61835
														21000	-8.88844	-1.32774	0.0764989	3.82514
														21100	-8.91879	-1.31958	-0.828536	3.96183
														21200	-8.90597	-1.30994	-1.76024	4.06498
														21300	-8.88349	-1.27367	-2.63091	4.13291
														21400	-8.85496	-1.20357	-3.47776	4.08548
														21500	-8.82014	-1.13239	-4.29569	3.96627
														21600	-8.77779	-1.06036	-5.05369	3.77426
														21700	-8.70975	-0.999171	-5.73201	3.5806
														21800	-8.64132	-0.933553	-6.29356	3.32376
														21900	-8.53021	-0.881543	-6.77163	3.0422
														22000	-8.40867	-0.837842	-7.19981	2.78953
														22100	-8.27884	-0.802858	-7.53512	2.58576
														22200	-8.10651	-0.816873	-7.77345	2.40784
														22300	-7.95213	-0.83715	-7.91115	2.21922
														22400	-7.83618	-0.875764	-7.99509	2.03057
														22500	-7.77491	-0.901788	-8.09816	1.85813
														22600	-7.78077	-0.885556	-8.21306	1.73242
														22700	-7.83503	-0.863602	-8.30811	1.63396
														22800	-7.92144	-0.845408	-8.37457	1.5715
														22900	-7.98687	-0.807084	-8.39857	1.54585
														23000	-8.07004	-0.762851	-8.40614	1.55041
														23100	-8.21045	-0.719502	-8.36225	1.56253
														23200	-8.32395	-0.627072	-8.32656	1.60519
														23300	-8.48127	-0.536358	-8.29413	1.6368
														23400	-8.56821	-0.425371	-8.29402	1.65028
														23500	-8.59738	-0.306707	-8.29437	1.65891
														23600	-8.5207	-0.155506	-8.29723	1.65977
														23700	-8.37192	-0.00895216	-8.29698	1.66507
														23800	-8.11517	0.136961	-8.29685	1.66958
														23900	-7.69631	0.3026	-8.29466	1.67159
														24000	-7.13466	0.453414	-8.29312	1.67157
														24100	-6.41561	0.589058	-8.29062	1.66959
														24200	-5.58541	0.69977	-8.28763	1.67469
														24300	-4.69539	0.808561	-8.26256	1.70063
														24400	-3.80082	0.893575	-8.26075	1.71717
														24500	-2.97223	0.969522	-8.27191	1.72376
														24600	-2.15849	1.05172	-8.29275	1.72273
														24700	-1.40051	1.10684	-8.32563	1.70439
														24800	-0.710344	1.11923	-8.3725	1.66752
														24900	-0.0383399	1.10939	-8.43197	1.6197
														25000	0.403262	1.08867	-8.50862	1.56765
														25100	0.663908	1.06599	-8.5878	1.50755
														25200	0.794447	1.06068	-8.67877	1.44025
														25300	0.769465	1.08838	-8.77036	1.36719
														25400	0.722847	1.20159	-8.85553	1.29532
														25500	0.550762	1.29449	-8.9264	1.22099
														25600	0.325029	1.38008	-8.98415	1.15218
														25700	0.00962991	1.43715	-9.02675	1.09743
														25800	-0.311034	1.45643	-9.05737	1.05149
														25900	-0.63004	1.4585	-9.07786	1.01711
														26000	-0.979626	1.39523	-9.08356	0.995761
														26100	-1.2613	1.30201	-9.07696	0.989431
														26200	-1.48761	1.17306	-9.08003	0.995015
														26300	-1.68441	1.03948	-9.08232	1.00723
														26400	-1.82089	0.834514	-9.07083	1.01061
														26500	-1.83979	0.643625	-9.06514	1.01795
														26600	-1.76504	0.447871	-9.05923	1.01727
														26700	-1.65324	0.235551	-9.06243	0.996192
														26800	-1.50838	0.0169387	-9.06709	0.949544
														26900	-1.30344	-0.186386	-9.07157	0.915298
														27000	-1.09489	-0.337155	-9.06964	0.916956
														27100	-0.921908	-0.426037	-9.00663	0.968554
														27200	-0.75055	-0.472399	-8.92211	1.02842
														27300	-0.59288	-0.496203	-8.81538	1.15781
														27400	-0.412564	-0.482882	-8.66922	1.33037
														27500	-0.235707	-0.474242	-8.44446	1.5166
														27600	-0.0793679	-0.432792	-8.14801	1.63965
														27700	0.0419589	-0.441065	-7.77915	1.78048
														27800	0.153407	-0.48859	-7.41662	1.91738
														27900	0.230932	-0.536422	-7.10543	2.02266
														28000	0.22443	-0.629724	-6.86496	2.1248
														28100	0.145257	-0.755615	-6.71461	2.13613
														28200	-0.0579295	-0.935366	-6.60868	2.08012
														28300	-0.40877	-1.2114	-6.53645	1.91886
														28400	-0.888963	-1.58056	-6.50815	1.62539
														28500	-1.50437	-1.9534	-6.53864	1.1986
														28600	-2.2522	-2.35761	-6.57819	0.666486
														28700	-3.13896	-2.76294	-6.67013	-0.0048824
														28800	-4.10592	-3.16202	-6.79395	-0.765903
														28900	-5.09189	-3.51843	-6.9446	-1.55522
														29000	-6.01686	-3.81031	-7.12763	-2.3419
														29100	-6.90513	-4.09079	-7.30464	-3.11977
														29200	-7.8047	-4.36804	-7.49032	-3.87958
														29300	-8.60278	-4.59997	-7.62044	-4.49489
														29400	-9.30156	-4.79676	-7.75223	-5.03147
														29500	-9.88674	-4.9586	-7.85197	-5.49686
														29600	-10.3194	-5.09045	-7.92861	-5.86241
														29700	-10.5784	-5.19208	-7.94097	-6.02524
														29800	-10.6526	-5.25849	-7.94091	-6.06583
														29900	-10.6183	-5.29645	-7.93664	-5.98538
														30000	-10.5014	-5.32987	-7.93957	-5.80426
														30100	-10.346	-5.35178	-7.95379	-5.57681
														30200	-10.2176	-5.38754	-7.98197	-5.2941
														30300	-10.0842	-5.40326	-8.02437	-5.02641
														30400	-9.9	-5.34712	-8.08789	-4.77149
														30500	-9.73376	-5.26637	-8.16165	-4.53889
														30600	-9.60822	-5.19417	-8.25767	-4.345
														30700	-9.51435	-5.12845	-8.38631	-4.22397
														30800	-9.42998	-5.07642	-8.52192	-4.14026
														30900	-9.38858	-5.04131	-8.66122	-4.09901
														31000	-9.42191	-5.07893	-8.79594	-4.0943
														31100	-9.58137	-5.21221	-8.8808	-4.04687
														31200	-9.801	-5.38205	-8.92929	-4.00317
														31300	-10.0366	-5.56257	-8.95992	-3.96948
														31400	-10.3052	-5.76529	-8.99142	-3.96184
														31500	-10.5695	-5.97373	-8.98716	-3.9725
														31600	-10.7882	-6.18666	-8.96498	-3.97934
														31700	-10.9864	-6.37458	-8.93346	-3.99333
														31800	-11.1713	-6.56015	-8.94468	-3.98864
														31900	-11.3391	-6.72852	-8.95007	-3.98326
														32000	-11.4551	-6.81749	-8.94339	-3.98151
														32100	-11.5332	-6.8322	-8.92788	-3.98836
														32200	-11.5696	-6.8225	-8.88799	-4.00891
														32300	-11.524	-6.81895	-8.83085	-4.03405
														32400	-11.4222	-6.83755	-8.77551	-4.04351
														32500	-11.3153	-6.91255	-8.73659	-4.05876
														32600	-11.2485	-7.03861	-8.70901	-4.09224
														32700	-11.2	-7.16326	-8.68653	-4.12562
														32800	-11.1608	-7.32823	-8.65731	-4.14648
														32900	-11.1388	-7.50944	-8.64528	-4.1793
														33000	-11.142	-7.71125	-8.6485	-4.21024
														33100	-11.142	-7.89721	-8.64828	-4.23065
														33200	-11.159	-8.07744	-8.65654	-4.24212
														33300	-11.1995	-8.26985	-8.67084	-4.23914
														33400	-11.2758	-8.47046	-8.67737	-4.22033
														33500	-11.3949	-8.67679	-8.6761	-4.18604
														33600	-11.5391	-8.87328	-8.67305	-4.13665
														33700	-11.7161	-9.06239	-8.66814	-4.07706
														33800	-11.879	-9.19121	-8.65316	-4.01662
														33900	-12.0058	-9.22725	-8.60059	-3.96624
														34000	-12.0877	-9.15472	-8.5324	-3.91673
														34100	-12.1262	-8.99816	-8.45505	-3.87176
														34200	-12.0746	-8.74407	-8.36602	-3.83123
														34300	-11.9589	-8.4151	-8.288	-3.78432
														34400	-11.8146	-8.03884	-8.25602	-3.74064
														34500	-11.6621	-7.63882	-8.23213	-3.7235
														34600	-11.5028	-7.20716	-8.20662	-3.71687
														34700	-11.3111	-6.64183	-8.18495	-3.71148
														34800	-11.129	-6.05755	-8.16952	-3.69797
														34900	-10.9925	-5.49397	-8.17502	-3.70385
														35000	-10.8857	-4.97927	-8.18601	-3.71142
														35100	-10.8021	-4.5657	-8.18944	-3.71216
														35200	-10.7666	-4.24028	-8.18636	-3.71365
														35300	-10.7677	-4.02562	-8.18364	-3.71246
														35400	-10.8168	-3.91789	-8.18021	-3.71211
														35500	-10.8958	-3.89716	-8.17683	-3.71096
														35600	-10.9919	-3.91977	-8.17542	-3.70894
														35700	-11.0954	-4.06739	-8.17382	-3.70717
														35800	-11.1672	-4.21799	-8.17208	-3.70472
														35900	-11.2039	-4.37197	-8.16945	-3.70248
														36000	-11.2271	-4.46903	-8.16729	-3.7002
														36100	-11.2274	-4.52153	-8.16585	-3.69752
														36200	-11.2129	-4.56117	-8.16308	-3.69525
														36300	-11.2096	-4.60769	-8.16109	-3.69377
														36400	-11.2036	-4.67782	-8.16011	-3.69209
														36500	-11.2012	-4.74803	-8.15823	-3.69103
														36600	-11.198	-4.78299	-8.15699	-3.69053
														36700	-11.2143	-4.76064	-8.15614	-3.68983
														36800	-11.2348	-4.7688	-8.15507	-3.6894
														36900	-11.2503	-4.78841	-8.15444	-3.6891
														37000	-11.2679	-4.81091	-8.15394	-3.6889
														37100	-11.285	-4.84467	-8.15328	-3.68855
														37200	-11.2973	-4.85427	-8.15245	-3.68805
														37300	-11.3082	-4.87021	-8.15211	-3.68707
														37400	-11.3252	-4.87814	-8.15153	-3.6862
														37500	-11.3359	-4.88342	-8.15127	-3.68483
														37600	-11.3409	-4.8865	-8.1512	-3.6835
														37700	-11.3406	-4.89122	-8.1508	-3.68191
														37800	-11.3414	-4.89421	-8.15045	-3.68034
														37900	-11.3385	-4.89539	-8.15056	-3.67928
														38000	-11.3393	-4.90238	-8.15007	-3.67791
														38100	-11.3405	-4.91689	-8.1484	-3.67145
														38200	-11.339	-4.92516	-8.14821	-3.67129
														38300	-11.3408	-4.92954	-8.14342	-3.67203
														38400	-11.3428	-4.93281	-8.14097	-3.67282
														38500	-11.3397	-4.93704	-8.14607	-3.67488
														38600	-11.3387	-4.94791	-8.18583	-3.69662
														38700	-11.3377	-4.96061	-8.21104	-3.70392
														38800	-11.3387	-4.97157	-8.21909	-3.70637
														38900	-11.3425	-4.98684	-8.20523	-3.70335
														39000	-11.3502	-5.00244	-8.16275	-3.69245
														39100	-11.3573	-5.02572	-8.08455	-3.67199
														39200	-11.3685	-5.05129	-7.97466	-3.63761
														39300	-11.3834	-5.10144	-7.82046	-3.5955
														39400	-11.3926	-5.13914	-7.63293	-3.54146
														39500	-11.3969	-5.17851	-7.42335	-3.47674
														39600	-11.3966	-5.20399	-7.19986	-3.40402
														39700	-11.3868	-5.2438	-6.98064	-3.32849
														39800	-11.3773	-5.26354	-6.78725	-3.25438
														39900	-11.3667	-5.27063	-6.61447	-3.18694
														40000	-11.3597	-5.27645	-6.45788	-3.12882
														40100	-11.3558	-5.26523	-6.3181	-3.07519
														40200	-11.3578	-5.23069	-6.20432	-3.03387
														40300	-11.365	-5.17952	-6.11964	-2.99873
														40400	-11.3648	-5.12541	-6.06676	-2.97181
														40500	-11.3613	-5.08742	-6.04247	-2.9532
														40600	-11.3596	-5.04737	-6.04737	-2.94154
														40700	-11.3601	-5.00983	-6.0854	-2.93844
														40800	-11.3705	-4.98147	-6.13053	-2.93929
														40900	-11.3841	-4.9625	-6.15786	-2.93753
														41000	-11.3967	-4.96219	-6.18159	-2.93206
														41100	-11.4179	-4.98095	-6.20437	-2.9287
														41200	-11.437	-5.00218	-6.22982	-2.92646
														41300	-11.4592	-5.00551	-6.24959	-2.92687
														41400	-11.4688	-5.01066	-6.28101	-2.92575
														41500	-11.4675	-5.00827	-6.30998	-2.9252
														41600	-11.4629	-4.99929	-6.34283	-2.92584
														41700	-11.4588	-4.96043	-6.3756	-2.92848
														41800	-11.4537	-4.90665	-6.3973	-2.92928
														41900	-11.4469	-4.84918	-6.4082	-2.93158
														42000	-11.4517	-4.79381	-6.41343	-2.93431
														42100	-11.4536	-4.70714	-6.41161	-2.93351
														42200	-11.452	-4.61583	-6.41055	-2.93355
														42300	-11.4541	-4.52887	-6.40594	-2.93509
														42400	-11.4479	-4.46182	-6.38488	-2.93524
														42500	-11.4461	-4.40977	-6.38207	-2.93669
														42600	-11.4496	-4.36705	-6.38152	-2.93493
														42700	-11.4491	-4.33066	-6.38161	-2.93268
														42800	-11.4649	-4.31462	-6.37168	-2.9321
														42900	-11.4779	-4.31091	-6.36484	-2.93242
														43000	-11.4831	-4.31596	-6.35873	-2.93583
														43100	-11.4971	-4.33106	-6.35103	-2.93627
														43200	-11.5093	-4.33145	-6.351	-2.92441
														43300	-11.5235	-4.33252	-6.36955	-2.91709
														43400	-11.5324	-4.33705	-6.393	-2.91032
														43500	-11.5304	-4.33167	-6.42721	-2.90697
														43600	-11.5316	-4.34131	-6.48503	-2.90493
														43700	-11.5338	-4.36479	-6.56033	-2.9114
														43800	-11.5328	-4.39355	-6.6343	-2.91163
														43900	-11.5226	-4.43162	-6.71005	-2.9102
														44000	-11.5307	-4.47717	-6.78039	-2.90602
														44100	-11.5355	-4.52449	-6.83907	-2.89227
														44200	-11.5389	-4.58762	-6.88596	-2.87337
														44300	-11.5499	-4.65549	-6.91656	-2.84677
														44400	-11.5556	-4.72475	-6.92407	-2.81422
														44500	-11.5656	-4.8075	-6.92377	-2.77979
														44600	-11.5741	-4.89158	-6.90899	-2.7433
														44700	-11.5729	-4.95558	-6.8655	-2.70662
														44800	-11.5796	-5.02078	-6.81801	-2.67263
														44900	-11.583	-5.0868	-6.76291	-2.63879
														45000	-11.5835	-5.14025	-6.70778	-2.60628
														45100	-11.584	-5.18527	-6.65777	-2.57417
														45200	-11.5836	-5.21139	-6.61263	-2.54458
														45300	-11.5755	-5.22011	-6.58904	-2.52948
														45400	-11.5664	-5.22515	-6.57453	-2.52501
														45500	-11.5538	-5.23782	-6.57985	-2.52783
														45600	-11.5416	-5.25176	-6.59474	-2.53396
														45700	-11.5279	-5.26486	-6.61921	-2.54447
														45800	-11.5167	-5.27898	-6.61982	-2.54994
														45900	-11.4923	-5.27603	-6.62923	-2.55762
														46000	-11.4746	-5.26976	-6.63487	-2.56338
														46100	-11.4567	-5.26578	-6.63795	-2.56343
														46200	-11.4354	-5.24416	-6.6407	-2.56338
														46300	-11.4191	-5.20652	-6.64302	-2.56221
														46400	-11.4048	-5.17898	-6.64377	-2.56171
														46500	-11.3896	-5.1486	-6.64238	-2.56076
														46600	-11.3796	-5.10766	-6.63977	-2.55971
														46700	-11.3683	-5.06591	-6.63981	-2.55995
														46800	-11.3625	-5.02748	-6.6395	-2.56023
														46900	-11.3656	-4.99611	-6.63974	-2.56078
														47000	-11.3689	-4.96589	-6.63827	-2.56099
														47100	-11.3667	-4.93167	-6.63822	-2.56171
														47200	-11.3729	-4.89744	-6.63818	-2.56147
														47300	-11.3824	-4.87961	-6.63779	-2.56149
														47400	-11.3879	-4.86395	-6.63733	-2.56113
														47500	-11.399	-4.85945	-6.63604	-2.56013
														47600	-11.408	-4.85553	-6.63584	-2.55965
														47700	-11.4213	-4.85254	-6.63478	-2.55868
														47800	-11.4252	-4.85265	-6.63387	-2.5577
														47900	-11.4203	-4.85612	-6.63358	-2.55732
														48000	-11.4062	-4.85457	-6.63315	-2.55658
														48100	-11.3898	-4.86116	-6.63177	-2.55559
														48200	-11.3693	-4.84485	-6.63389	-2.55665
														48300	-11.3481	-4.84562	-6.63122	-2.55484
														48400	-11.3293	-4.84307	-6.6288	-2.55323
														48500	-11.2998	-4.83787	-6.62678	-2.55195
														48600	-11.2798	-4.82748	-6.62016	-2.54445
														48700	-11.2558	-4.81442	-6.60591	-2.54341
														48800	-11.2354	-4.7834	-6.6048	-2.53516
														48900	-11.22	-4.75311	-6.62961	-2.5324
														49000	-11.2132	-4.71188	-6.65695	-2.534
														49100	-11.1977	-4.66204	-6.67174	-2.5401
														49200	-11.1956	-4.61201	-6.68129	-2.54275
														49300	-11.1949	-4.57475	-6.64682	-2.56115
														49400	-11.187	-4.54529	-6.60549	-2.59181
														49500	-11.1865	-4.54179	-6.57946	-2.59056
														49600	-11.1864	-4.54692	-6.5744	-2.61771
														49700	-11.1851	-4.54625	-6.58734	-2.64294
														49800	-11.1767	-4.56711	-6.58599	-2.71053
														49900	-11.1682	-4.60497	-6.56652	-2.81914
														50000	-11.1584	-4.64674	-6.56083	-2.97495
														50100	-11.1603	-4.69847	-6.58919	-3.14767
														50200	-11.1634	-4.74906	-6.64257	-3.35189
														50300	-11.1661	-4.82279	-6.7269	-3.58523
														50400	-11.1658	-4.88815	-6.82815	-3.8468
														50500	-11.1716	-4.9519	-6.98326	-4.12945
														50600	-11.1702	-4.97914	-7.17642	-4.42223
														50700	-11.1771	-4.98568	-7.38958	-4.7327
														50800	-11.1852	-4.98544	-7.5984	-4.9308
														50900	-11.2063	-4.9782	-7.79705	-5.10383
														51000	-11.2166	-4.96381	-7.95197	-5.2579
														51100	-11.2213	-4.96254	-8.03931	-5.37234
														51200	-11.2249	-4.97032	-8.09285	-5.44662
														51300	-11.2228	-5.00397	-8.10079	-5.48515
														51400	-11.2125	-5.04118	-8.10943	-5.47864
														51500	-11.18	-5.07897	-8.10022	-5.46005
														51600	-11.1525	-5.09945	-8.05479	-5.40801
														51700	-11.145	-5.099	-7.96458	-5.33655
														51800	-11.1697	-5.10885	-7.84488	-5.29676
														51900	-11.2061	-5.1136	-7.72676	-5.24868
														52000	-11.2557	-5.10625	-7.63758	-5.20419
														52100	-11.3158	-5.0952	-7.57063	-5.15634
														52200	-11.3999	-5.08649	-7.51397	-5.135
														52300	-11.479	-5.09953	-7.48209	-5.12988
														52400	-11.5823	-5.0918	-7.47202	-5.1366
														52500	-11.6747	-5.05353	-7.49104	-5.1504
														52600	-11.762	-5.01847	-7.51953	-5.16263
														52700	-11.8232	-4.96945	-7.5445	-5.16617
														52800	-11.8574	-4.93436	-7.54482	-5.16716
														52900	-11.8693	-4.93283	-7.54614	-5.16688
														53000	-11.8519	-4.96875	-7.5466	-5.16664
														53100	-11.8075	-5.01948	-7.54728	-5.16649
														53200	-11.7371	-5.07153	-7.54861	-5.16732
														53300	-11.6393	-5.10675	-7.55373	-5.16751
														53400	-11.512	-5.13966	-7.55696	-5.16893
														53500	-11.3784	-5.16679	-7.55689	-5.16774
														53600	-11.2726	-5.18038	-7.55408	-5.16588
														53700	-11.2019	-5.20846	-7.54944	-5.16361
														53800	-11.1283	-5.25079	-7.54253	-5.16147
														53900	-11.0704	-5.3041	-7.53342	-5.15861
														54000	-11.0285	-5.34639	-7.52296	-5.15516
														54100	-11.0095	-5.41028	-7.51129	-5.15171
														54200	-11.0183	-5.47437	-7.4992	-5.14886
														54300	-11.0203	-5.52256	-7.49022	-5.14513
														54400	-11.0485	-5.51139	-7.48149	-5.14361
														54500	-11.078	-5.46246	-7.47188	-5.14146
														54600	-11.0926	-5.39909	-7.46259	-5.13877
														54700	-11.1234	-5.32403	-7.45513	-5.13515
														54800	-11.1409	-5.24894	-7.44887	-5.13222
														54900	-11.1591	-5.16593	-7.44441	-5.12855
														55000	-11.1927	-5.06597	-7.44257	-5.12543
														55100	-11.2349	-4.94786	-7.44301	-5.12289
														55200	-11.2952	-4.84142	-7.44552	-5.12163
														55300	-11.3277	-4.73624	-7.44994	-5.11764
														55400	-11.3502	-4.66054	-7.44825	-5.11541
														55500	-11.3487	-4.58427	-7.44583	-5.11243
														55600	-11.3048	-4.51437	-7.44456	-5.11094
														55700	-11.225	-4.4298	-7.44322	-5.10988
														55800	-11.1218	-4.32318	-7.44131	-5.10925
														55900	-11.0249	-4.2019	-7.44109	-5.10941
														56000	-10.8795	-4.08488	-7.4422	-5.10991
														56100	-10.7115	-3.98618	-7.44406	-5.11146
														56200	-10.5096	-3.87457	-7.44751	-5.11469
														56300	-10.303	-3.71642	-7.45179	-5.11497
														56400	-10.1211	-3.52408	-7.45233	-5.11544
														56500	-9.95857	-3.32544	-7.45319	-5.11657
														56600	-9.77687	-3.15727	-7.45456	-5.11662
														56700	-9.61405	-2.98694	-7.45708	-5.11674
														56800	-9.45812	-2.83311	-7.45933	-5.11717
														56900	-9.35336	-2.70848	-7.46094	-5.11708
														57000	-9.29462	-2.61742	-7.46232	-5.11769
														57100	-9.28409	-2.53931	-7.46311	-5.11865
														57200	-9.29801	-2.48617	-7.46408	-5.1194
														57300	-9.29263	-2.46317	-7.46517	-5.11957
														57400	-9.29333	-2.45628	-7.46618	-5.12
														57500	-9.27102	-2.44402	-7.46779	-5.12098
														57600	-9.2807	-2.41849	-7.46836	-5.12124
														57700	-9.32757	-2.38882	-7.46875	-5.12147
														57800	-9.39359	-2.35782	-7.46995	-5.12199
														57900	-9.4585	-2.3467	-7.47112	-5.12254
														58000	-9.46268	-2.37252	-7.47214	-5.12254
														58100	-9.46399	-2.4057	-7.47332	-5.12303
														58200	-9.45967	-2.43433	-7.47383	-5.12294
														58300	-9.48987	-2.43407	-7.47378	-5.12296
														58400	-9.52319	-2.42524	-7.47468	-5.12341
														58500	-9.52539	-2.4302	-7.47588	-5.12345
														58600	-9.4844	-2.46115	-7.47682	-5.12352
														58700	-9.45606	-2.46985	-7.47788	-5.12393
														58800	-9.43583	-2.45576	-7.47855	-5.12443
														58900	-9.41717	-2.4517	-7.47856	-5.12469
														59000	-9.38161	-2.44674	-7.47931	-5.12525
														59100	-9.35324	-2.45223	-7.48002	-5.12576
														59200	-9.30704	-2.4931	-7.4803	-5.126
														59300	-9.2526	-2.5573	-7.48137	-5.1261
														59400	-9.22539	-2.61973	-7.48239	-5.12655
														59500	-9.21288	-2.68233	-7.48325	-5.12733
														59600	-9.21814	-2.72343	-7.48356	-5.1271
														59700	-9.22848	-2.74491	-7.48481	-5.12723
														59800	-9.23641	-2.77978	-7.48983	-5.13
														59900	-9.2265	-2.82025	-7.4945	-5.13051
														60000	-9.21349	-2.86078	-7.49473	-5.12944
														60100	-9.23003	-2.90513	-7.47638	-5.12984
														60200	-9.25994	-2.9272	-7.47986	-5.12941
														60300	-9.30031	-2.92946	-7.46812	-5.13153
														60400	-9.32458	-2.91278	-7.46511	-5.12363
														60500	-9.33358	-2.89621	-7.46219	-5.12276
														60600	-9.34502	-2.88635	-7.44105	-5.0875
														60700	-9.37502	-2.83814	-7.44594	-5.04449
														60800	-9.39279	-2.76143	-7.46153	-5.0239
														60900	-9.39806	-2.73025	-7.47941	-5.03185
														61000	-9.38224	-2.70411	-7.49114	-5.08913
														61100	-9.3491	-2.71578	-7.51271	-5.16167
														61200	-9.30804	-2.80437	-7.54011	-5.23223
														61300	-9.24229	-2.9737	-7.56929	-5.33542
														61400	-9.15711	-3.26309	-7.60347	-5.55026
														61500	-9.06435	-3.65137	-7.63732	-5.75896
														61600	-8.98461	-4.14073	-7.6623	-5.9019
														61700	-8.95707	-4.83552	-7.67004	-5.98124
														61800	-8.94768	-5.62289	-7.67134	-5.95411
														61900	-8.95605	-6.44407	-7.66062	-5.81049
														62000	-8.98409	-7.31594	-7.65177	-5.53667
														62100	-9.02265	-8.18651	-7.63318	-5.12276
														62200	-9.07491	-9.02366	-7.6359	-4.59193
														62300	-9.18074	-9.78095	-7.60543	-3.9399
														62400	-9.35229	-10.4012	-7.57717	-3.16137
														62500	-9.50077	-10.9188	-7.51038	-2.32201
														62600	-9.58146	-11.3473	-7.42023	-1.45907
														62700	-9.62059	-11.6673	-7.32261	-0.59855
														62800	-9.56182	-11.9108	-7.19967	0.196235
														62900	-9.41591	-12.0936	-7.03922	0.914517
														63000	-9.15635	-12.276	-6.86164	1.53763
														63100	-8.76831	-12.4133	-6.6942	2.08272
														63200	-8.24975	-12.5571	-6.5123	2.50499
														63300	-7.6031	-12.7252	-6.32742	2.78732
														63400	-6.87355	-12.9509	-6.15679	2.98208
														63500	-6.13348	-13.2226	-5.98914	3.12862
														63600	-5.38925	-13.4944	-5.83886	3.22084
														63700	-4.63265	-13.7298	-5.71707	3.28227
														63800	-3.83781	-13.8835	-5.65039	3.30183
														63900	-3.04157	-13.9612	-5.62503	3.3261
														64000	-2.22892	-13.9388	-5.62442	3.33159
														64100	-1.43998	-13.7603	-5.64622	3.32819
														64200	-0.732356	-13.4277	-5.69315	3.2913
														64300	-0.0978213	-12.9943	-5.75603	3.24838
														64400	0.449539	-12.4838	-5.8164	3.21379
														64500	0.975421	-11.8989	-5.85527	3.17109
														64600	1.4629	-11.2865	-5.90351	3.15256
														64700	1.95938	-10.6139	-5.94023	3.13169
														64800	2.41778	-9.9383	-5.96887	3.1163
														64900	2.82087	-9.30307	-5.98201	3.1069
														65000	3.18508	-8.73645	-5.99557	3.09874
														65100	3.56819	-8.19743	-6.0057	3.09346
														65200	3.94562	-7.75461	-5.99618	3.09615
														65300	4.31514	-7.4559	-5.98193	3.10278
														65400	4.6401	-7.25334	-5.96699	3.10922
														65500	4.9195	-7.14162	-5.94291	3.12414
														65600	5.10426	-7.07036	-5.93665	3.12699
														65700	5.2232	-7.05458	-5.93499	3.12975
														65800	5.28666	-7.09518	-5.93832	3.12951
														65900	5.27831	-7.13283	-5.9387	3.13
														66000	5.20452	-7.12827	-5.93351	3.13293
														66100	5.00487	-7.16212	-5.93229	3.13411
														66200	4.65567	-7.22912	-5.93383	3.13384
														66300	4.22438	-7.29201	-5.93693	3.13225
														66400	3.7346	-7.33917	-5.93732	3.13294
														66500	3.23417	-7.36147	-5.94122	3.13183
														66600	2.74775	-7.35882	-5.93987	3.13368
														66700	2.28849	-7.3439	-5.93894	3.13459
														66800	1.91621	-7.34367	-5.93602	3.13662
														66900	1.6157	-7.34674	-5.93405	3.13828
														67000	1.39069	-7.35183	-5.93637	3.1378
														67100	1.19424	-7.34429	-5.93824	3.13758
														67200	1.03666	-7.30891	-5.93565	3.1392
														67300	1.01644	-7.21439	-5.93562	3.13966
														67400	1.03947	-7.07148	-5.9366	3.13918
														67500	0.880817	-6.92322	-5.9357	3.14026
														67600	0.704969	-6.72052	-5.93678	3.14063
														67700	0.57353	-6.52659	-5.93793	3.14114
														67800	0.423196	-6.27971	-5.93948	3.14058
														67900	0.189698	-6.00008	-5.93673	3.14238
														68000	-0.118334	-5.7057	-5.93419	3.14415
														68100	-0.503289	-5.44	-5.93274	3.1449
														68200	-0.919619	-5.17952	-5.93349	3.14464
														68300	-1.31465	-4.93309	-5.93529	3.1435
														68400	-1.69457	-4.72079	-5.93744	3.14265
														68500	-2.03752	-4.52954	-5.93681	3.14304
														68600	-2.30485	-4.35788	-5.93509	3.14421
														68700	-2.50638	-4.19718	-5.93532	3.14424
														68800	-2.66243	-4.07454	-5.93637	3.14425
														68900	-2.78898	-3.97212	-5.93852	3.14308
														69000	-2.86302	-3.89794	-5.93969	3.14468
														69100	-2.88117	-3.85999	-5.93332	3.15633
														69200	-2.91506	-3.8249	-5.91391	3.17698
														69300	-2.94213	-3.80317	-5.89217	3.18793
														69400	-2.9694	-3.81519	-5.88495	3.18744
														69500	-2.9503	-3.86952	-5.89506	3.18131
														69600	-2.91573	-3.92638	-5.92804	3.14738
														69700	-2.88611	-4.00198	-6.00714	3.10131
														69800	-2.87816	-4.05144	-6.10291	3.04342
														69900	-2.88955	-4.11469	-6.20983	2.97632
														70000	-2.89998	-4.18442	-6.34961	2.90528
														70100	-2.91227	-4.25017	-6.50222	2.82678
														70200	-2.93786	-4.28823	-6.62912	2.74726
														70300	-2.9678	-4.31417	-6.7411	2.65417
														70400	-3.00067	-4.32871	-6.854	2.54073
														70500	-3.0338	-4.3308	-6.90625	2.41891
														70600	-3.06707	-4.32049	-6.91199	2.29781
														70700	-3.10045	-4.29636	-6.88727	2.17994
														70800	-3.11853	-4.28577	-6.8308	2.06834
														70900	-3.13037	-4.27539	-6.73444	1.96865
														71000	-3.13632	-4.27364	-6.59471	1.88566
														71100	-3.1296	-4.27746	-6.45485	1.81772
														71200	-3.14292	-4.26855	-6.28663	1.75813
														71300	-3.14941	-4.27846	-6.10811	1.6909
														71400	-3.1269	-4.28988	-5.94779	1.63652
														71500	-3.10121	-4.29905	-5.8286	1.59008
														71600	-3.08606	-4.31799	-5.7698	1.54343
														71700	-3.09712	-4.33817	-5.72284	1.51823
														71800	-3.11482	-4.36072	-5.68248	1.51336
														71900	-3.12888	-4.38086	-5.65954	1.5183
														72000	-3.14139	-4.37265	-5.66134	1.53132
														72100	-3.17923	-4.36749	-5.67766	1.54601
														72200	-3.21128	-4.34038	-5.70881	1.56279
														72300	-3.25417	-4.30881	-5.70899	1.56192
														72400	-3.30689	-4.27587	-5.70688	1.55788
														72500	-3.36704	-4.24167	-5.70864	1.55535
														72600	-3.43721	-4.21122	-5.70179	1.55492
														72700	-3.48681	-4.1709	-5.69882	1.55506
														72800	-3.53535	-4.1294	-5.69854	1.55421
														72900	-3.58505	-4.09041	-5.70502	1.55491
														73000	-3.60916	-4.04514	-5.70334	1.55198
														73100	-3.5958	-4.01311	-5.70724	1.54995
														73200	-3.59468	-3.98012	-5.70376	1.54844
														73300	-3.5608	-3.94579	-5.70317	1.54623
														73400	-3.52477	-3.91223	-5.70171	1.54476
														73500	-3.52167	-3.90272	-5.7041	1.54254
														73600	-3.52281	-3.90725	-5.69874	1.53931
														73700	-3.50069	-3.91532	-5.69266	1.53865
														73800	-3.50193	-3.934	-5.69251	1.53977
														73900	-3.4876	-3.93401	-5.68994	1.53975
														74000	-3.47127	-3.91817	-5.68759	1.5404
														74100	-3.46975	-3.91237	-5.68834	1.54028
														74200	-3.46357	-3.90487	-5.68827	1.53886
														74300	-3.52021	-3.94849	-5.68612	1.53723
														74400	-3.57958	-3.99526	-5.68317	1.53496
														74500	-3.63537	-4.03863	-5.68125	1.53562
														74600	-3.6834	-4.06949	-5.67852	1.53719
														74700	-3.715	-4.08474	-5.67837	1.53795
														74800	-3.76231	-4.1117	-5.67959	1.53809
														74900	-3.8098	-4.12117	-5.68077	1.5377
														75000	-3.83538	-4.11191	-5.68015	1.53621
														75100	-3.84693	-4.10444	-5.67817	1.5364
														75200	-3.88732	-4.11525	-5.67646	1.53717
														75300	-3.90837	-4.1251	-5.67603	1.53775
														75400	-3.94919	-4.15144	-5.67742	1.53827
														75500	-3.99617	-4.18293	-5.67907	1.53779
														75600	-4.01305	-4.21154	-5.65435	1.53074
														75700	-4.04205	-4.25222	-5.62429	1.51466
														75800	-4.10205	-4.28097	-5.61023	1.50042
														75900	-4.12227	-4.29137	-5.62056	1.49842
														76000	-4.14886	-4.29373	-5.66976	1.5015
														76100	-4.1916	-4.31674	-5.74668	1.52365
														76200	-4.24205	-4.31907	-5.80828	1.55066
														76300	-4.29956	-4.32569	-5.89833	1.58926
														76400	-4.33334	-4.31137	-6.04899	1.63172
														76500	-4.36448	-4.29798	-6.21357	1.67023
														76600	-4.39468	-4.28809	-6.37274	1.73641
														76700	-4.43258	-4.29186	-6.50283	1.83258
														76800	-4.47374	-4.30593	-6.5939	1.95643
														76900	-4.5065	-4.31904	-6.63982	2.10739
														77000	-4.54709	-4.36362	-6.64894	2.27987
														77100	-4.5627	-4.42935	-6.62028	2.47898
														77200	-4.60546	-4.49525	-6.55719	2.6964
														77300	-4.64874	-4.53849	-6.45038	2.91898
														77400	-4.68276	-4.58809	-6.30112	3.12634
														77500	-4.71062	-4.61398	-6.1448	3.29876
														77600	-4.72205	-4.63958	-5.99177	3.42769
														77700	-4.7021	-4.64323	-5.835	3.52874
														77800	-4.64953	-4.62991	-5.71106	3.61115
														77900	-4.59866	-4.60337	-5.62299	3.67305
														78000	-4.55216	-4.52869	-5.55858	3.70863
														78100	-4.48747	-4.4441	-5.50647	3.72189
														78200	-4.43638	-4.35977	-5.46688	3.67173
														78300	-4.41293	-4.29464	-5.48361	3.65659
														78400	-4.3761	-4.24877	-5.51419	3.6359
														78500	-4.34515	-4.22188	-5.55089	3.57495
														78600	-4.31913	-4.21374	-5.54901	3.55893
														78700	-4.3022	-4.22479	-5.55016	3.54163
														78800	-4.29712	-4.24192	-5.54449	3.53415
														78900	-4.28704	-4.27435	-5.53616	3.53428
														79000	-4.28181	-4.31609	-5.53047	3.53602
														79100	-4.25925	-4.31706	-5.52051	3.5471
														79200	-4.2469	-4.3113	-5.51618	3.55281
														79300	-4.23046	-4.30881	-5.52032	3.55646
														79400	-4.1857	-4.30319	-5.52518	3.55896
														79500	-4.13017	-4.29938	-5.53184	3.5543
														79600	-4.06252	-4.2983	-5.53006	3.55298
														79700	-3.99425	-4.28841	-5.53348	3.55246
														79800	-3.91303	-4.29536	-5.53578	3.55224
														79900	-3.88566	-4.27565	-5.53979	3.55046
														80000	-3.86308	-4.26042	-5.5454	3.54612
														80100	-3.8288	-4.2578	-5.55253	3.54015
														80200	-3.82303	-4.26546	-5.54992	3.54136
														80300	-3.80814	-4.29321	-5.55061	3.54196
														80400	-3.8009	-4.3144	-5.54382	3.54689
														80500	-3.80033	-4.34699	-5.54082	3.55027
														80600	-3.81121	-4.37161	-5.54198	3.54936
														80700	-3.82595	-4.39056	-5.54567	3.54546
														80800	-3.82183	-4.4013	-5.54604	3.54654
														80900	-3.82568	-4.41859	-5.54835	3.54485
														81000	-3.83845	-4.42566	-5.55004	3.54306
														81100	-3.83757	-4.42494	-5.55336	3.54065
														81200	-3.84145	-4.42591	-5.55904	3.53522
														81300	-3.8475	-4.42975	-5.56558	3.53057
														81400	-3.84731	-4.4343	-5.57532	3.52256
														81500	-3.85327	-4.43736	-5.58301	3.51527
														81600	-3.87443	-4.42382	-5.58985	3.51128
														81700	-3.88972	-4.41514	-5.59292	3.5095
														81800	-3.90567	-4.40834	-5.59654	3.50655
														81900	-3.92906	-4.39651	-5.60235	3.50133
														82000	-3.93409	-4.39165	-5.60807	3.49619
														82100	-3.94107	-4.37108	-5.6103	3.49457
														82200	-3.94011	-4.351	-5.61119	3.49576
														82300	-3.93372	-4.33688	-5.60978	3.49814
														82400	-3.94086	-4.32183	-5.60825	3.49971
														82500	-3.93666	-4.32507	-5.60895	3.4992
														82600	-3.93729	-4.32641	-5.61329	3.49474
														82700	-3.92702	-4.3333	-5.61536	3.49195
														82800	-3.91405	-4.3482	-5.61529	3.49319
														82900	-3.91438	-4.37925	-5.61801	3.49169
														83000	-3.91411	-4.42047	-5.6191	3.49175
														83100	-3.9197	-4.45762	-5.62251	3.48837
														83200	-3.93702	-4.47006	-5.62553	3.48588
														83300	-3.94682	-4.49069	-5.63081	3.48072
														83400	-3.97129	-4.49486	-5.58342	3.50566
														83500	-4.00262	-4.49085	-5.54649	3.49965
														83600	-4.03	-4.48231	-5.54006	3.4957
														83700	-4.05435	-4.47237	-5.56529	3.47566
														83800	-4.07712	-4.45465	-5.62745	3.43857
														83900	-4.08897	-4.43418	-5.73862	3.38732
														84000	-4.0947	-4.40705	-5.88509	3.32256
														84100	-4.09789	-4.39922	-6.06743	3.24488
														84200	-4.10388	-4.42152	-6.27966	3.14104
														84300	-4.1195	-4.45311	-6.51255	3.01379
														84400	-4.13099	-4.48484	-6.74649	2.88843
														84500	-4.13326	-4.51345	-6.97904	2.75397
														84600	-4.13563	-4.53308	-7.18424	2.63731
														84700	-4.13193	-4.5534	-7.35753	2.53995
														84800	-4.12682	-4.58248	-7.49571	2.45674
														84900	-4.12875	-4.59282	-7.60321	2.38425
														85000	-4.12497	-4.60902	-7.66799	2.3247
														85100	-4.12069	-4.59277	-7.69323	2.29276
														85200	-4.11835	-4.5532	-7.67577	2.27685
														85300	-4.10637	-4.52934	-7.63251	2.26127
														85400	-4.10036	-4.4853	-7.60367	2.2491
														85500	-4.09254	-4.43744	-7.53338	2.26746
														85600	-4.08158	-4.39624	-7.51233	2.26454
														85700	-4.08627	-4.345	-7.51402	2.26539
														85800	-4.07973	-4.28662	-7.52389	2.26707
														85900	-4.08249	-4.23435	-7.54615	2.27097
														86000	-4.0862	-4.19953	-7.57719	2.27388
														86100	-4.09233	-4.18226	-7.61519	2.27886
														86200	-4.10022	-4.18616	-7.64051	2.27089
														86300	-4.1069	-4.20676	-7.66938	2.26192
														86400	-4.1027	-4.2418	-7.70637	2.25624
														86500	-4.09431	-4.275	-7.75683	2.24548
														86600	-4.07717	-4.30932	-7.80747	2.23562
														86700	-4.06287	-4.35633	-7.854	2.22628
														86800	-4.04954	-4.40407	-7.89103	2.20868
														86900	-4.05114	-4.42157	-7.92339	2.19789
														87000	-4.0488	-4.43799	-7.95951	2.18717
														87100	-4.04455	-4.45337	-8.00133	2.17186
														87200	-4.03776	-4.48303	-8.0387	2.15481
														87300	-4.02552	-4.53272	-8.05683	2.13873
														87400	-4.0027	-4.61457	-8.07588	2.12438
														87500	-3.99163	-4.67581	-8.10279	2.10792
														87600	-3.99947	-4.70638	-8.12297	2.08652
														87700	-4.01143	-4.67725	-8.13727	2.06677
														87800	-4.03903	-4.66957	-8.14186	2.05062
														87900	-4.09026	-4.6274	-8.14243	2.03528
														88000	-4.13264	-4.58637	-8.15159	2.01917
														88100	-4.1774	-4.55562	-8.14891	2.00414
														88200	-4.2158	-4.52332	-8.13143	1.99004
														88300	-4.25479	-4.49633	-8.12651	1.98111
														88400	-4.29098	-4.47697	-8.13193	1.97167
														88500	-4.32282	-4.49085	-8.13172	1.96225
														88600	-4.35788	-4.48985	-8.12221	1.95661
														88700	-4.39599	-4.50923	-8.09927	1.95334
														88800	-4.417	-4.5096	-8.07902	1.948
														88900	-4.43344	-4.50047	-8.06244	1.94883
														89000	-4.41933	-4.50304	-8.05903	1.94446
														89100	-4.39033	-4.52163	-8.04983	1.93978
														89200	-4.35691	-4.55465	-8.03661	1.93755
														89300	-4.31037	-4.61458	-8.02536	1.93489
														89400	-4.27032	-4.70174	-8.03519	1.93081
														89500	-4.24422	-4.72053	-8.04524	1.92409
														89600	-4.24545	-4.71498	-8.04861	1.91984
														89700	-4.23783	-4.71213	-8.05167	1.92202
														89800	-4.24556	-4.72994	-8.05113	1.92283
														89900	-4.25339	-4.68585	-8.05748	1.92226
														90000	-4.24264	-4.64726	-8.06146	1.92046
														90100	-4.23807	-4.58933	-8.04372	1.92523
														90200	-4.23545	-4.52613	-8.03161	1.93202
														90300	-4.23732	-4.48949	-8.03937	1.93328
														90400	-4.22356	-4.46705	-8.04306	1.9358
														90500	-4.21989	-4.44522	-8.02935	1.94649
														90600	-4.20445	-4.39755	-8.0088	1.95706
														90700	-4.18012	-4.3539	-8.005	1.96377
														90800	-4.15454	-4.27256	-7.99475	1.96898
														90900	-4.12073	-4.20658	-7.99953	1.96693
														91000	-4.08112	-4.13775	-8.01303	1.96381
														91100	-4.03777	-4.08317	-8.02728	1.96035
														91200	-4.00813	-4.05983	-8.03479	1.95652
														91300	-3.9653	-4.06348	-8.04295	1.95563
														91400	-3.92169	-4.06753	-8.06434	1.95207
														91500	-3.87369	-4.04521	-8.06722	1.95444
														91600	-3.84242	-4.02887	-8.08802	1.95215
														91700	-3.82419	-4.02999	-8.10009	1.95264
														91800	-3.83783	-4.03709	-8.11135	1.95264
														91900	-3.87486	-4.04165	-8.10532	1.96142
														92000	-3.90421	-4.04429	-8.09382	1.97367
														92100	-3.9444	-4.04115	-8.09495	1.9851
														92200	-3.99411	-4.05654	-8.10653	1.9926
														92300	-4.06343	-4.09995	-8.11573	2.00162
														92400	-4.169	-4.15595	-8.11005	2.01379
														92500	-4.28508	-4.22457	-8.09571	2.02714
														92600	-4.36943	-4.28488	-8.07855	2.0359
														92700	-4.47638	-4.35371	-8.08348	2.03771
														92800	-4.54898	-4.4108	-8.07426	2.04064
														92900	-4.6092	-4.48365	-8.08118	2.04136
														93000	-4.66075	-4.54376	-8.0654	2.04984
														93100	-4.69245	-4.59508	-8.04121	2.0719
														93200	-4.71556	-4.65324	-8.01371	2.08771
														93300	-4.73001	-4.71241	-8.00123	2.10372
														93400	-4.71433	-4.7494	-8.00103	2.11856
														93500	-4.69068	-4.75351	-7.99217	2.1256
														93600	-4.68127	-4.76812	-7.99583	2.12882
														93700	-4.70061	-4.7831	-7.98217	2.13588
														93800	-4.71412	-4.8082	-7.9689	2.14807
														93900	-4.69571	-4.80895	-7.96008	2.1624
														94000	-4.653	-4.79583	-7.97363	2.15659
														94100	-4.57779	-4.74616	-7.98887	2.14765
														94200	-4.51471	-4.69893	-7.98426	2.14847
														94300	-4.46707	-4.65854	-7.9811	2.14745
														94400	-4.42681	-4.61942	-7.97486	2.13988
														94500	-4.38382	-4.59138	-7.97903	2.12153
														94600	-4.33256	-4.55705	-7.99161	2.10727
														94700	-4.28489	-4.51392	-8.0107	2.0973
														94800	-4.22995	-4.45585	-8.02222	2.09317
														94900	-4.19791	-4.42012	-8.03367	2.0917
														95000	-4.16766	-4.37594	-8.0383	2.09927
														95100	-4.12371	-4.31785	-8.04505	2.10874
														95200	-4.0873	-4.26853	-8.06153	2.11415
														95300	-4.05902	-4.22288	-8.07267	2.12291
														95400	-4.03889	-4.20385	-8.08577	2.12462
														95500	-4.07112	-4.19805	-8.08901	2.12727
														95600	-4.11254	-4.21709	-8.08604	2.13263
														95700	-4.14502	-4.21272	-8.08058	2.13984
														95800	-4.15669	-4.21076	-8.0772	2.14935
														95900	-4.15311	-4.20224	-8.0738	2.16262
														96000	-4.14987	-4.18931	-8.05005	2.17224
														96100	-4.14351	-4.17705	-8.03453	2.18017
														96200	-4.16476	-4.18974	-8.01746	2.18628
														96300	-4.20238	-4.23118	-8.00798	2.18401
														96400	-4.25058	-4.31008	-8.01052	2.18045
														96500	-4.31286	-4.38059	-8.01851	2.16932
														96600	-4.35756	-4.43354	-8.02484	2.15871
														96700	-4.37336	-4.42353	-8.0187	2.15502
														96800	-4.40976	-4.44031	-8.01664	2.14867
														96900	-4.42722	-4.48835	-8.02754	2.13827
														97000	-4.45472	-4.52803	-8.03091	2.1312
														97100	-4.46793	-4.51598	-8.05236	2.10701
														97200	-4.4951	-4.51248	-8.07431	2.08683
														97300	-4.53745	-4.53347	-8.08677	2.07218
														97400	-4.58408	-4.58017	-8.11261	2.05205
														97500	-4.64	-4.61807	-8.12217	2.05017
														97600	-4.69261	-4.63324	-8.1388	2.0452
														97700	-4.72477	-4.62148	-8.16378	2.03652
														97800	-4.74229	-4.59351	-8.19274	2.01897
														97900	-4.75419	-4.54496	-8.2156	2.00764
														98000	-4.74484	-4.47739	-8.22993	1.99922
														98100	-4.7082	-4.40215	-8.23722	2.00607
														98200	-4.6285	-4.30862	-8.23733	2.01097
														98300	-4.53485	-4.21677	-8.23085	2.01817
														98400	-4.44988	-4.12015	-8.21831	2.02991
														98500	-4.35467	-3.9945	-8.19316	2.04686
														98600	-4.24505	-3.87728	-8.15033	2.07043
														98700	-4.14124	-3.76375	-8.10004	2.10229
														98800	-4.05293	-3.71841	-8.0588	2.12981
														98900	-3.9761	-3.7028	-8.01606	2.16057
														99000	-3.92074	-3.66386	-7.9694	2.18771
														99100	-3.86753	-3.6245	-7.93778	2.20898
														99200	-3.82995	-3.64382	-7.89886	2.23682
														99300	-3.8325	-3.69407	-7.85709	2.26294
														99400	-3.90296	-3.75276	-7.82948	2.28609
														99500	-4.00116	-3.78415	-7.7994	2.31325
														99600	-4.05154	-3.81148	-7.79215	2.31903
														99700	-4.04175	-3.81247	-7.78998	2.31977
														99800	-3.93779	-3.80667	-7.79206	2.31573
														99900	-3.81091	-3.82222	-7.78384	2.32077
														100000	-3.60556	-3.86421	-7.77769	2.32793
														100100	-3.24257	-3.96976	-7.77487	2.33202
														100200	-2.77264	-4.12461	-7.7828	2.32631
														100300	-2.25697	-4.31778	-7.78948	2.32136
														100400	-1.73123	-4.52578	-7.79079	2.32166
														100500	-1.13893	-4.82422	-7.79289	2.32033
														100600	-0.498327	-5.20185	-7.79489	2.31378
														100700	0.118878	-5.65513	-7.79981	2.30927
														100800	0.703027	-6.15866	-7.79551	2.31312
														100900	1.25796	-6.68172	-7.79101	2.31665
														101000	1.76824	-7.278	-7.78924	2.31832
														101100	2.18904	-7.89795	-7.78778	2.31871
														101200	2.49052	-8.51921	-7.78639	2.31316
														101300	2.64898	-9.11148	-7.78186	2.31089
														101400	2.73504	-9.63619	-7.77446	2.31864
														101500	2.75903	-10.1103	-7.765	2.32549
														101600	2.76081	-10.5463	-7.75782	2.32757
														101700	2.73151	-10.8942	-7.74802	2.32889
														101800	2.63327	-11.1746	-7.74632	2.32362
														101900	2.48576	-11.3966	-7.74158	2.32127
														102000	2.41282	-11.5778	-7.73077	2.32769
														102100	2.35823	-11.6705	-7.72217	2.33522
														102200	2.28681	-11.6776	-7.71856	2.33694
														102300	2.21132	-11.6311	-7.71482	2.33868
														102400	2.15644	-11.5596	-7.71455	2.33759
														102500	2.15154	-11.552	-7.71628	2.33422
														102600	2.16781	-11.5425	-7.71501	2.33248
														102700	2.17256	-11.5539	-7.7138	2.3376
														102800	2.21427	-11.5731	-7.719	2.33871
														102900	2.28513	-11.6162	-7.72753	2.33341
														103000	2.37085	-11.7023	-7.73718	2.32662
														103100	2.45622	-11.7839	-7.74667	2.31762
														103200	2.55945	-11.9146	-7.75213	2.31204
														103300	2.67741	-12.0662	-7.75588	2.31119
														103400	2.808	-12.1882	-7.75199	2.3156
														103500	2.93398	-12.2535	-7.75315	2.31233
														103600	3.04552	-12.2501	-7.76058	2.30528
														103700	3.12397	-12.2004	-7.76096	2.30168
														103800	3.18519	-12.1104	-7.76382	2.29636
														103900	3.34138	-11.9689	-7.76177	2.29816
														104000	3.39692	-11.7859	-7.76304	2.29883
														104100	3.37101	-11.5873	-7.76324	2.29757
														104200	3.28303	-11.3968	-7.76604	2.29454
														104300	3.15631	-11.2183	-7.76881	2.29217
														104400	2.94599	-11.0637	-7.77323	2.28826
														104500	2.63181	-10.9087	-7.77688	2.28523
														104600	2.2215	-10.7704	-7.77991	2.28313
														104700	1.70547	-10.6149	-7.78713	2.27718
														104800	1.12761	-10.4717	-7.79909	2.26913
														104900	0.432945	-10.3438	-7.80329	2.26569
														105000	-0.486936	-10.2313	-7.80771	2.26242
														105100	-1.39644	-10.1575	-7.81606	2.25479
														105200	-2.31267	-10.1106	-7.82473	2.24931
														105300	-3.29661	-10.0459	-7.84122	2.24828
														105400	-4.32106	-9.91956	-7.85336	2.25028
														105500	-5.43629	-9.7733	-7.85771	2.25581
														105600	-6.62689	-9.60845	-7.85708	2.26745
														105700	-7.73384	-9.4522	-7.83766	2.30821
														105800	-8.65063	-9.30076	-7.85024	2.35135
														105900	-9.50912	-9.16291	-7.84575	2.41662
														106000	-10.3624	-9.02439	-7.81133	2.46673
														106100	-11.1168	-8.89242	-7.73742	2.49751
														106200	-11.7519	-8.78012	-7.60986	2.50375
														106300	-12.2619	-8.66214	-7.4477	2.46584
														106400	-12.6792	-8.54306	-7.22044	2.32409
														106500	-13.0012	-8.45806	-6.93534	2.10654
														106600	-13.2418	-8.39517	-6.59097	1.84302
														106700	-13.4138	-8.34622	-6.16532	1.48402
														106800	-13.5054	-8.33005	-5.63269	0.991667
														106900	-13.7004	-8.35369	-4.95683	0.313905
														107000	-13.8617	-8.4012	-4.17344	-0.454631
														107100	-13.9171	-8.47268	-3.3941	-1.25275
														107200	-13.8951	-8.54176	-2.63349	-2.05988
														107300	-13.8242	-8.59493	-1.90348	-2.85098
														107400	-13.6958	-8.6273	-1.19185	-3.61129
														107500	-13.5011	-8.64598	-0.5076	-4.36633
														107600	-13.1873	-8.67693	0.0645728	-5.10414
														107700	-12.8478	-8.72912	0.484496	-5.7618
														107800	-12.4876	-8.7631	0.741779	-6.37686
														107900	-12.1408	-8.73831	0.905168	-6.97656
														108000	-11.8146	-8.68605	0.904198	-7.55638
														108100	-11.5507	-8.63345	0.773282	-8.08947
														108200	-11.3558	-8.56864	0.48378	-8.62149
														108300	-11.1856	-8.45627	0.0516634	-9.1045
														108400	-11.0522	-8.3056	-0.559185	-9.50131
														108500	-10.939	-8.06471	-1.368	-9.76969
														108600	-10.9229	-7.74287	-2.28826	-9.92866
														108700	-10.9954	-7.35665	-3.21688	-10.0161
														108800	-11.0795	-6.93388	-4.12914	-10.005
														108900	-11.1769	-6.47273	-4.95981	-9.91765
														109000	-11.2348	-5.95959	-5.90957	-9.75974
														109100	-11.2011	-5.42008	-6.87422	-9.42617
														109200	-11.1111	-4.8577	-7.74075	-9.04813
														109300	-11.0042	-4.31122	-8.49589	-8.64248
														109400	-10.8704	-3.81433	-9.11639	-8.25947
														109500	-10.7006	-3.42359	-9.6287	-7.9421
														109600	-10.5173	-3.13703	-10.0163	-7.67581
														109700	-10.3584	-2.90805	-10.2569	-7.45054
														109800	-10.2242	-2.72884	-10.3719	-7.31491
														109900	-10.1308	-2.6106	-10.4143	-7.25603
														110000	-10.0826	-2.56567	-10.4379	-7.23791
														110100	-10.0539	-2.57879	-10.3718	-7.29437
														110200	-10.0315	-2.64443	-10.2615	-7.42515
														110300	-9.99908	-2.66131	-10.1702	-7.55775
														110400	-9.98176	-2.66016	-10.1623	-7.59052
														110500	-9.97278	-2.66099	-10.1731	-7.55724
														110600	-10.0054	-2.66809	-10.1918	-7.47092
														110700	-10.0395	-2.67392	-10.2152	-7.3419
														110800	-10.0416	-2.6808	-10.2412	-7.17559
														110900	-10.0579	-2.68212	-10.2847	-6.96579
														111000	-10.0973	-2.65281	-10.325	-6.71812
														111100	-10.1316	-2.61649	-10.3929	-6.44034
														111200	-10.0999	-2.59778	-10.4436	-6.20214
														111300	-10.0712	-2.62354	-10.4566	-6.00605
														111400	-10.0007	-2.68499	-10.4399	-5.87838
														111500	-9.8694	-2.78539	-10.3861	-5.842
														111600	-9.68411	-2.91174	-10.2833	-5.90051
														111700	-9.45256	-3.07408	-10.1546	-6.03811
														111800	-9.16809	-3.2602	-10.0057	-6.24451
														111900	-8.82998	-3.46186	-9.83677	-6.52054
														112000	-8.44805	-3.65598	-9.63664	-6.87947
														112100	-8.0488	-3.84901	-9.43348	-7.27104
														112200	-7.67262	-4.0255	-9.25664	-7.66228
														112300	-7.33666	-4.18957	-9.08196	-8.03158
														112400	-7.05487	-4.33302	-8.92742	-8.32876
														112500	-6.81778	-4.47113	-8.78898	-8.57792
														112600	-6.65033	-4.57855	-8.67658	-8.76404
														112700	-6.54392	-4.65061	-8.59624	-8.88758
														112800	-6.48961	-4.68192	-8.54356	-8.94873
														112900	-6.46325	-4.68252	-8.53458	-8.94372
														113000	-6.47022	-4.65525	-8.5628	-8.89308
														113100	-6.53556	-4.62059	-8.62736	-8.81065
														113200	-6.59269	-4.62582	-8.69101	-8.76098
														113300	-6.59213	-4.64876	-8.75535	-8.73755
														113400	-6.57643	-4.66958	-8.84876	-8.69943
														113500	-6.55847	-4.69626	-8.94682	-8.67164
														113600	-6.54682	-4.71793	-9.05938	-8.65215
														113700	-6.53876	-4.72522	-9.1821	-8.61961
														113800	-6.53957	-4.71616	-9.31294	-8.5769
														113900	-6.58923	-4.68612	-9.45633	-8.53816
														114000	-6.65807	-4.64645	-9.62823	-8.46765
														114100	-6.72539	-4.61486	-9.77159	-8.34915
														114200	-6.78568	-4.57349	-9.86314	-8.16837
														114300	-6.84495	-4.53179	-9.91255	-7.8838
														114400	-6.93304	-4.48545	-9.91201	-7.46534
														114500	-7.05497	-4.44183	-9.84994	-6.88724
														114600	-7.20742	-4.3759	-9.73581	-6.17645
														114700	-7.36782	-4.32133	-9.54226	-5.29828
														114800	-7.51777	-4.26861	-9.25149	-4.29199
														114900	-7.61183	-4.24468	-8.89263	-3.19343
														115000	-7.71242	-4.22722	-8.43446	-2.03931
														115100	-7.7921	-4.22506	-7.93031	-0.849798
														115200	-7.8419	-4.21827	-7.39773	0.29519
														115300	-7.83526	-4.23732	-6.83863	1.38913
														115400	-7.78977	-4.26221	-6.26467	2.39369
														115500	-7.73972	-4.25411	-5.69667	3.26258
														115600	-7.68055	-4.24065	-5.13803	3.96054
														115700	-7.5636	-4.15701	-4.61685	4.50533
														115800	-7.44707	-3.95966	-4.19035	4.86096
														115900	-7.32844	-3.69831	-3.85923	5.06938
														116000	-7.17859	-3.37188	-3.59745	5.16877
														116100	-7.05863	-2.99103	-3.38632	5.1836
														116200	-6.9848	-2.568	-3.26214	5.13314
														116300	-6.96155	-2.12489	-3.19739	5.07681
														116400	-7.01743	-1.67487	-3.17199	5.03549
														116500	-7.12339	-1.22448	-3.1833	5.00266
														116600	-7.27772	-0.778955	-3.24425	4.9712
														116700	-7.47783	-0.335476	-3.28538	4.97438
														116800	-7.71997	0.0832857	-3.28138	4.97967
														116900	-7.99111	0.448731	-3.29319	4.98225
														117000	-8.27877	0.765069	-3.29099	4.98198
														117100	-8.53187	0.980861	-3.28643	4.97459
														117200	-8.75972	1.12868	-3.2814	4.97571
														117300	-8.8885	1.1926	-3.28538	4.9781
														117400	-8.9435	1.2081	-3.28146	4.98199
														117500	-8.94561	1.18934	-3.28069	4.98385
														117600	-8.89151	1.09248	-3.26527	4.98726
														117700	-8.81377	0.944017	-3.26702	4.98921
														117800	-8.71177	0.780718	-3.27491	4.98994
														117900	-8.58006	0.630185	-3.26493	4.99493
														118000	-8.45322	0.539515	-3.25468	5.00192
														118100	-8.34622	0.413933	-3.25519	5.00705
														118200	-8.26554	0.258513	-3.26391	5.00927
														118300	-8.19403	0.102075	-3.25896	5.01348
														118400	-8.18272	-0.0509659	-3.25522	5.01547
														118500	-8.18844	-0.210007	-3.25317	5.01844
														118600	-8.15594	-0.381676	-3.24859	5.01881
														118700	-8.0688	-0.614401	-3.24213	5.02123
														118800	-7.92679	-0.941424	-3.25465	5.01825
														118900	-7.72866	-1.37142	-3.26194	5.015
														119000	-7.32598	-1.92359	-3.26423	5.01225
														119100	-6.81552	-2.75132	-3.26865	5.00927
														119200	-6.16533	-3.63092	-3.27743	5.00766
														119300	-5.44921	-4.56522	-3.29076	5.00418
														119400	-4.68954	-5.57873	-3.30813	5.00255
														119500	-3.92911	-6.66574	-3.32333	5.0024
														119600	-3.20233	-7.81135	-3.33416	5.00079
														119700	-2.50196	-9.01583	-3.35038	5.00012
														119800	-1.84644	-10.0932	-3.359	5.00013
														119900	-1.29026	-10.9741	-3.36357	5.00204
														120000	-0.862048	-11.7199	-3.3749	5.00444
														120100	-0.56995	-12.3417	-3.37836	5.00574
														120200	-0.392322	-12.8348	-3.38465	5.00597
														120300	-0.271973	-13.1762	-3.38507	5.00699
														120400	-0.220063	-13.4098	-3.37924	5.00802
														120500	-0.268664	-13.5385	-3.37886	5.00815
														120600	-0.380021	-13.5474	-3.376	5.00836
														120700	-0.47228	-13.4986	-3.36549	5.00909
														120800	-0.555051	-13.3734	-3.35845	5.01714
														120900	-0.492177	-13.2965	-3.34834	5.02813
														121000	-0.389276	-13.2741	-3.37091	5.04679
														121100	-0.234051	-13.2692	-3.39011	5.05387
														121200	-0.0349995	-13.2376	-3.3968	5.05348
														121300	0.203051	-13.2043	-3.39374	5.03994
														121400	0.51215	-13.1757	-3.36835	5.00596
														121500	0.84927	-13.1264	-3.3141	4.95036
														121600	1.1887	-13.09	-3.26185	4.88085
														121700	1.51357	-13.0689	-3.19791	4.80088
														121800	1.85971	-13.0618	-3.10298	4.68342
														121900	2.22984	-13.0806	-2.97755	4.5135
														122000	2.55098	-13.0981	-2.84996	4.35266
														122100	2.8034	-13.1018	-2.6989	4.14951
														122200	3.0121	-13.1278	-2.53586	3.88993
														122300	3.14062	-13.0991	-2.37279	3.67057
														122400	3.12521	-13.0216	-2.22119	3.40139
														122500	3.01532	-12.8718	-2.09408	3.13577
														122600	2.86654	-12.6899	-1.95962	2.91526
														122700	2.67804	-12.5745	-1.83341	2.69334
														122800	2.40123	-12.5058	-1.74743	2.51335
														122900	2.06413	-12.4854	-1.67894	2.36033
														123000	1.7002	-12.512	-1.62321	2.24241
														123100	1.35939	-12.5623	-1.59623	2.14453
														123200	1.03434	-12.6171	-1.57604	2.08386
														123300	0.661795	-12.6842	-1.54277	2.05696
														123400	0.312054	-12.7641	-1.51325	2.01034
														123500	-0.00388007	-12.8579	-1.51218	1.98735
														123600	-0.326344	-12.984	-1.52985	2.00618
														123700	-0.663834	-13.1067	-1.54258	2.0589
														123800	-1.05317	-13.1993	-1.55927	2.12506
														123900	-1.49971	-13.3001	-1.57007	2.21831
														124000	-2.08903	-13.4086	-1.59073	2.35319
														124100	-2.76526	-13.4254	-1.59183	2.47626
														124200	-3.46979	-13.3894	-1.57306	2.62531
														124300	-4.22875	-13.3419	-1.60116	2.80709
														124400	-5.00958	-13.2856	-1.60434	2.90394
														124500	-5.77756	-13.2313	-1.63582	3.00655
														124600	-6.53237	-13.2449	-1.7025	3.06801
														124700	-7.27489	-13.3507	-1.77597	3.04742
														124800	-7.97715	-13.4985	-1.86489	3.00629
														124900	-8.54701	-13.7146	-1.97033	2.92404
														125000	-8.91155	-13.9375	-2.08833	2.80088
														125100	-9.13325	-14.1963	-2.21433	2.64
														125200	-9.25754	-14.4597	-2.34021	2.4465
														125300	-9.29749	-14.6612	-2.45887	2.22796
														125400	-9.22138	-14.7618	-2.56928	2.00688
														125500	-9.08942	-14.7574	-2.67103	1.81554
														125600	-8.87936	-14.7119	-2.76425	1.65616
														125700	-8.59681	-14.6636	-2.8611	1.53021
														125800	-8.31917	-14.6631	-2.91842	1.4402
														125900	-8.12817	-14.6466	-2.9547	1.4003
														126000	-7.97158	-14.5578	-2.94555	1.41391
														126100	-7.80592	-14.4192	-2.91731	1.46815
														126200	-7.64683	-14.2011	-2.861	1.54263
														126300	-7.52291	-13.9717	-2.79436	1.60055
														126400	-7.45426	-13.7351	-2.70214	1.6563
														126500	-7.43122	-13.554	-2.61274	1.71871
														126600	-7.48993	-13.4276	-2.51933	1.77727
														126700	-7.58157	-13.3139	-2.406	1.83196
														126800	-7.70578	-13.2579	-2.26745	1.89557
														126900	-7.79458	-13.2869	-2.09668	1.95356
														127000	-7.88015	-13.3415	-1.9628	1.99448
														127100	-7.97053	-13.4446	-1.89177	2.02927
														127200	-8.06934	-13.5196	-1.89369	2.05912
														127300	-8.1702	-13.5638	-1.98015	2.07616
														127400	-8.26457	-13.6153	-2.16802	2.07351
														127500	-8.33623	-13.7025	-2.46402	2.05424
														127600	-8.3562	-13.8577	-2.85058	2.02016
														127700	-8.35492	-14.0334	-3.30158	1.98435
														127800	-8.33308	-14.2088	-3.75582	1.9481
														127900	-8.32261	-14.3023	-4.2728	1.92511
														128000	-8.31529	-14.3486	-4.78891	1.88841
														128100	-8.26959	-14.3488	-5.28193	1.84527
														128200	-8.1614	-14.3203	-5.71884	1.80344
														128300	-8.02322	-14.3065	-6.13186	1.75448
														128400	-7.93632	-14.2999	-6.47319	1.71973
														128500	-7.89318	-14.2785	-6.77359	1.68064
														128600	-7.95229	-14.2236	-7.02909	1.63515
														128700	-8.05153	-14.1155	-7.14555	1.61818
														128800	-8.22515	-13.974	-7.18893	1.59649
														128900	-8.46205	-13.8073	-7.20327	1.62058
														129000	-8.77791	-13.6212	-7.23829	1.58658
														129100	-9.20487	-13.398	-7.29762	1.60935
														129200	-9.72278	-13.1411	-7.43213	1.58239
														129300	-10.2752	-12.8675	-7.60895	1.47131
														129400	-10.812	-12.5943	-7.83635	1.24329
														129500	-11.2882	-12.3657	-8.10312	0.94782
														129600	-11.6898	-12.1848	-8.39329	0.580885
														129700	-12.0034	-12.064	-8.69205	0.153372
														129800	-12.2231	-12.0539	-8.96326	-0.348564
														129900	-12.3348	-12.1617	-9.31449	-0.897273
														130000	-12.3322	-12.3336	-9.65206	-1.3693
														130100	-12.1996	-12.5143	-9.9401	-1.83212
														130200	-11.9945	-12.764	-10.1883	-2.20848
														130300	-11.7105	-13.0167	-10.4248	-2.51118
														130400	-11.3716	-13.2197	-10.5891	-2.77752
														130500	-11.0879	-13.2992	-10.7195	-2.95138
														130600	-10.839	-13.2841	-10.7854	-3.04745
														130700	-10.5643	-13.1924	-10.799	-3.04887
														130800	-10.2869	-13.075	-10.7765	-2.97026
														130900	-10.0245	-12.9274	-10.731	-2.84576
														131000	-9.78858	-12.7278	-10.6899	-2.69824
														131100	-9.60596	-12.522	-10.6159	-2.49534
														131200	-9.43423	-12.3445	-10.6071	-2.37631
														131300	-9.23844	-12.1735	-10.5993	-2.30721
														131400	-9.01185	-11.9777	-10.5729	-2.25886
														131500	-8.72213	-11.7516	-10.5443	-2.12587
														131600	-8.3774	-11.485	-10.5145	-2.06691
														131700	-7.97991	-11.1633	-10.4805	-2.07592
														131800	-7.48282	-10.6816	-10.4367	-2.17989
														131900	-6.90033	-10.0759	-10.3689	-2.23156
														132000	-6.28391	-9.36149	-10.3261	-2.28638
														132100	-5.62973	-8.53045	-10.2932	-2.40401
														132200	-4.97515	-7.64811	-10.2178	-2.60578
														132300	-4.28591	-6.62572	-10.1441	-2.90449
														132400	-3.59492	-5.53701	-10.0456	-3.31396
														132500	-2.94727	-4.45209	-9.92137	-3.83276
														132600	-2.28181	-3.43043	-9.82818	-4.44005
														132700	-1.6011	-2.5339	-9.67007	-5.09616
														132800	-0.931292	-1.82258	-9.45141	-5.81655
														132900	-0.329187	-1.29369	-9.20419	-6.57928
														133000	0.195671	-0.95216	-8.90689	-7.32797
														133100	0.65026	-0.80173	-8.53793	-8.0741
														133200	1.07605	-0.789503	-8.04304	-8.80873
														133300	1.47656	-0.913595	-7.39285	-9.4893
														133400	1.86372	-1.15193	-6.68703	-10.037
														133500	2.21893	-1.45437	-5.93548	-10.4877
														133600	2.53018	-1.78646	-5.17309	-10.9536
														133700	2.83591	-2.04698	-4.4075	-11.3515
														133800	3.11427	-2.28576	-3.66899	-11.6654
														133900	3.37673	-2.55251	-3.00286	-11.8397
														134000	3.54587	-2.77497	-2.40048	-11.8991
														134100	3.69191	-2.96273	-1.83025	-11.8639
														134200	3.78979	-3.12388	-1.29644	-11.7141
														134300	3.88445	-3.27254	-0.811872	-11.3957
														134400	3.96247	-3.47202	-0.341227	-10.8915
														134500	4.03628	-3.72476	0.144717	-10.1744
														134600	4.13471	-4.03612	0.633537	-9.25425
														134700	4.23126	-4.36036	1.12939	-8.25687
														134800	4.29918	-4.70762	1.5852	-7.23098
														134900	4.3488	-5.03492	1.98631	-6.21298
														135000	4.38279	-5.36369	2.39622	-5.1204
														135100	4.43159	-5.69676	2.75408	-3.98572
														135200	4.50698	-6.03906	3.01064	-2.84226
														135300	4.58413	-6.39349	3.21788	-1.7475
														135400	4.66893	-6.75595	3.37138	-0.723384
														135500	4.74668	-7.12457	3.45688	0.162524
														135600	4.79835	-7.47817	3.38948	0.858641
														135700	4.88632	-7.83277	3.18448	1.45156
														135800	5.00034	-8.21776	2.86686	1.92397
														135900	5.09897	-8.5228	2.43911	2.29464
														136000	5.15198	-8.73013	1.96495	2.60496
														136100	5.18494	-8.8515	1.40115	2.86094
														136200	5.19844	-8.87834	0.729397	3.07993
														136300	5.18797	-8.86412	0.0700413	3.30334
														136400	5.09264	-8.82757	-0.552025	3.50468
														136500	4.92271	-8.74384	-1.18983	3.6493
														136600	4.70145	-8.61152	-1.84149	3.71957
														136700	4.46057	-8.41445	-2.50766	3.6993
														136800	4.13622	-8.15037	-3.17361	3.63077
														136900	3.74068	-7.85005	-3.83013	3.57565
														137000	3.25029	-7.52378	-4.43672	3.58646
														137100	2.63896	-7.22669	-4.9811	3.5917
														137200	1.99305	-6.94378	-5.44031	3.58162
														137300	1.32032	-6.69507	-5.79899	3.52767
														137400	0.59867	-6.45557	-6.06423	3.45493
														137500	-0.127281	-6.26828	-6.24888	3.38655
														137600	-0.857125	-6.12495	-6.35829	3.34168
														137700	-1.48726	-6.0574	-6.44271	3.34001
														137800	-2.06894	-6.02785	-6.48799	3.33477
														137900	-2.58809	-5.92048	-6.44972	3.35063
														138000	-3.03583	-5.73435	-6.32012	3.36154
														138100	-3.42267	-5.53622	-6.1887	3.36878
														138200	-3.65387	-5.35555	-5.98747	3.38112
														138300	-3.73879	-5.24091	-5.73814	3.39937
														138400	-3.83674	-5.20244	-5.41269	3.42095
														138500	-3.88967	-5.18066	-5.10625	3.44625
														138600	-3.94413	-5.17586	-4.74101	3.48193
														138700	-3.98475	-5.17788	-4.3797	3.50479
														138800	-3.99369	-5.19993	-4.03064	3.54118
														138900	-4.10381	-5.22909	-3.69813	3.58355
														139000	-4.33333	-5.3061	-3.39658	3.62711
														139100	-4.54221	-5.39055	-3.15817	3.70007
														139200	-4.8053	-5.47136	-2.95368	3.76721
														139300	-5.06808	-5.5533	-2.78608	3.81148
														139400	-5.33546	-5.61328	-2.66149	3.86571
														139500	-5.53769	-5.70569	-2.56252	3.92728
														139600	-5.68561	-5.79505	-2.45272	3.96252
														139700	-5.74975	-5.87652	-2.39251	3.99531
														139800	-5.78215	-5.92376	-2.34505	4.02438
														139900	-5.79843	-5.92928	-2.25168	4.05625
														140000	-5.81621	-5.88056	-2.17871	4.07469
														140100	-5.80046	-5.81893	-2.10143	4.09978
														140200	-5.79081	-5.75904	-2.03929	4.11539
														140300	-5.79509	-5.67098	-1.97688	4.13995
														140400	-5.89531	-5.48953	-1.91923	4.13929
														140500	-6.09422	-5.28208	-1.88915	4.16298
														140600	-6.37199	-5.0737	-1.86922	4.16885
														140700	-6.69975	-4.83171	-1.84217	4.16236
														140800	-7.08251	-4.56027	-1.82422	4.18946
														140900	-7.47171	-4.27073	-1.81728	4.1828
														141000	-7.90266	-4.00517	-1.81474	4.18226
														141100	-8.25653	-3.68444	-1.8245	4.17964
														141200	-8.61675	-3.4103	-1.80658	4.1522
														141300	-8.97556	-3.16473	-1.79726	4.12341
														141400	-9.28715	-2.9499	-1.8068	4.12374
														141500	-9.50674	-2.7925	-1.82155	4.13558
														141600	-9.64404	-2.64039	-1.81555	4.12058
														141700	-9.69412	-2.49116	-1.83509	4.13201
														141800	-9.6651	-2.35129	-1.85148	4.13552
														141900	-9.54481	-2.18302	-1.87478	4.14513
														142000	-9.28259	-1.97974	-1.90428	4.16298
														142100	-8.73852	-1.81468	-1.9304	4.18899
														142200	-8.03026	-1.65551	-1.95393	4.21958
														142300	-7.26249	-1.48761	-1.95965	4.27436
														142400	-6.41462	-1.30712	-1.97262	4.33123
														142500	-5.45586	-1.17662	-2.01618	4.45024
														142600	-4.37362	-1.04736	-2.02048	4.48659
														142700	-3.28539	-0.903172	-2.02028	4.51341
														142800	-2.2504	-0.766954	-2.01546	4.50455
														142900	-1.33224	-0.639266	-1.99002	4.44124
														143000	-0.525438	-0.53054	-1.92391	4.26789
														143100	0.171169	-0.444351	-1.84122	4.04615
														143200	0.643759	-0.431809	-1.72285	3.75598
														143300	0.865207	-0.421747	-1.53949	3.28616
														143400	0.952033	-0.398008	-1.34917	2.74728
														143500	0.912676	-0.399722	-1.11653	2.12937
														143600	0.803562	-0.410657	-0.878816	1.5001
														143700	0.657538	-0.451415	-0.654873	0.831185
														143800	0.491828	-0.533988	-0.388145	0.150721
														143900	0.392953	-0.641005	-0.111293	-0.508939
														144000	0.451903	-0.783945	0.145545	-1.12744
														144100	0.522681	-0.97961	0.371395	-1.67809
														144200	0.511697	-1.19236	0.601507	-2.11086
														144300	0.446493	-1.43266	0.842037	-2.39093
														144400	0.289821	-1.7427	1.08269	-2.56815
														144500	0.0764708	-2.10315	1.36157	-2.62725
														144600	-0.249588	-2.50575	1.65049	-2.62125
														144700	-0.774387	-2.89646	1.93858	-2.51604
														144800	-1.46935	-3.26723	2.22774	-2.38912
														144900	-2.25897	-3.61546	2.53058	-2.21894
														145000	-3.07345	-3.95559	2.85678	-2.03248
														145100	-3.98414	-4.22831	3.18492	-1.85614
														145200	-4.89925	-4.42432	3.53715	-1.79213
														145300	-5.75534	-4.54451	3.89187	-1.79704
														145400	-6.4853	-4.61421	4.21477	-1.80936
														145500	-7.01695	-4.7043	4.5292	-1.87646
														145600	-7.35465	-4.79626	4.78804	-1.975
														145700	-7.5646	-4.88479	5.04577	-2.19825
														145800	-7.65296	-4.99178	5.29194	-2.47446
														145900	-7.59472	-5.07781	5.48714	-2.78169
														146000	-7.39916	-5.12993	5.64302	-3.09432
														146100	-7.1468	-5.1562	5.74768	-3.38599
														146200	-6.88858	-5.1701	5.89413	-3.67602
														146300	-6.68885	-5.2054	5.98786	-3.88653
														146400	-6.55158	-5.2569	6.0386	-4.04095
														146500	-6.44001	-5.29729	6.07544	-4.15326
														146600	-6.42842	-5.32952	6.06695	-4.26344
														146700	-6.54285	-5.35127	6.03796	-4.35576
														146800	-6.71657	-5.37421	5.98262	-4.45915
														146900	-6.95478	-5.39696	5.91105	-4.54567
														147000	-7.29321	-5.39875	5.81744	-4.62891
														147100	-7.69433	-5.39621	5.73876	-4.72886
														147200	-8.04247	-5.39878	5.71158	-4.86521
														147300	-8.37833	-5.37986	5.64933	-5.05794
														147400	-8.6674	-5.36362	5.5619	-5.30779
														147500	-8.9737	-5.37513	5.48245	-5.65097
														147600	-9.30871	-5.42984	5.34568	-6.11923
														147700	-9.60817	-5.46864	5.12647	-6.62655
														147800	-9.8461	-5.4726	4.86206	-7.15438
														147900	-10.0755	-5.43298	4.56153	-7.70987
														148000	-10.2466	-5.35347	4.21454	-8.27455
														148100	-10.3396	-5.2464	3.75765	-8.73947
														148200	-10.3414	-5.08155	3.32786	-9.12733
														148300	-10.2351	-4.87008	2.83886	-9.47403
														148400	-10.0495	-4.62055	2.34799	-9.80487
														148500	-9.76482	-4.38378	1.90102	-10.1202
														148600	-9.4131	-4.14462	1.51413	-10.395
														148700	-9.05403	-3.87624	1.20741	-10.5835
														148800	-8.51548	-3.60234	0.975243	-10.7138
														148900	-7.85305	-3.34956	0.813646	-10.7756
														149000	-7.11812	-3.106	0.712571	-10.7917
														149100	-6.30691	-2.91947	0.673756	-10.7788
														149200	-5.42105	-2.71298	0.696038	-10.7485
														149300	-4.49283	-2.52608	0.798882	-10.7177
														149400	-3.52948	-2.38497	0.810159	-10.6951
														149500	-2.56848	-2.28506	0.807404	-10.6913
														149600	-1.60418	-2.22094	0.813279	-10.6874
														149700	-0.661747	-2.15912	0.826053	-10.6779
														149800	0.201088	-2.10551	0.837857	-10.6699
														149900	0.990286	-2.07614	0.868823	-10.664
														150000	1.75457	-2.05194	0.935451	-10.6472
														150100	2.47533	-2.01095	1.01248	-10.6214
														150200	3.05963	-1.93684	1.06077	-10.6225
														150300	3.50897	-1.82125	1.07184	-10.6134
														150400	3.79247	-1.71502	1.0234	-10.631
														150500	3.93689	-1.60633	0.880342	-10.6732
														150600	3.90825	-1.45082	0.69254	-10.7315
														150700	3.7708	-1.3297	0.433767	-10.8127
														150800	3.64628	-1.23865	0.101924	-10.9087
														150900	3.42479	-1.16437	-0.303129	-11.0253
														151000	3.10211	-1.06972	-0.769113	-11.1585
														151100	2.74617	-0.987016	-1.36448	-11.3071
														151200	2.43288	-0.891962	-1.95966	-11.4661
														151300	2.14366	-0.825156	-2.60751	-11.6193
														151400	1.9062	-0.801516	-3.20868	-11.7618
														151500	1.71387	-0.823827	-3.74635	-11.8759
														151600	1.55109	-0.888551	-4.21686	-11.9744
														151700	1.4301	-0.990379	-4.62136	-12.055
														151800	1.36102	-1.11947	-4.93847	-12.1219
														151900	1.30529	-1.28205	-5.15175	-12.1482
														152000	1.26922	-1.4446	-5.30932	-12.136
														152100	1.24727	-1.59729	-5.41324	-12.1292
														152200	1.19862	-1.73177	-5.4852	-12.1563
														152300	1.14956	-1.83907	-5.52063	-12.179
														152400	1.10361	-1.94497	-5.53664	-12.2069
														152500	1.04313	-2.0587	-5.55317	-12.1997
														152600	1.00638	-2.14996	-5.55531	-12.1187
														152700	0.955091	-2.24339	-5.57364	-11.9365
														152800	0.951834	-2.31049	-5.60828	-11.6084
														152900	0.95372	-2.31112	-5.67944	-11.1048
														153000	0.98217	-2.31824	-5.78389	-10.3586
														153100	1.06464	-2.35984	-5.90509	-9.39209
														153200	1.18042	-2.37349	-6.02432	-8.2759
														153300	1.30429	-2.33873	-6.06666	-7.04683
														153400	1.38627	-2.30512	-6.10839	-5.75442
														153500	1.38332	-2.23351	-6.15722	-4.44458
														153600	1.29236	-2.06536	-6.20233	-3.16616
														153700	1.08697	-1.84965	-6.24553	-1.99558
														153800	0.796038	-1.54596	-6.27552	-0.938397
														153900	0.315893	-1.2089	-6.27097	0.0303041
														154000	-0.318309	-0.841075	-6.22568	0.852149
														154100	-1.02019	-0.479982	-6.11692	1.47595
														154200	-1.7825	-0.158566	-5.96901	1.92188
														154300	-2.60048	0.146746	-5.81137	2.21746
														154400	-3.45901	0.435865	-5.64616	2.40036
														154500	-4.32364	0.711103	-5.46185	2.50356
														154600	-5.1353	0.974109	-5.22304	2.57085
														154700	-5.9208	1.19894	-4.91354	2.66166
														154800	-6.59902	1.38134	-4.59013	2.82817
														154900	-7.18789	1.52173	-4.2493	3.07187
														155000	-7.58253	1.61516	-3.86629	3.35274
														155100	-7.86244	1.67071	-3.45793	3.63707
														155200	-8.05054	1.73408	-3.05175	3.90179
														155300	-8.18065	1.80294	-2.65879	4.15795
														155400	-8.29939	1.85224	-2.30372	4.3885
														155500	-8.43871	1.93197	-1.9969	4.54908
														155600	-8.54186	1.99239	-1.71234	4.6775
														155700	-8.69386	2.00222	-1.44238	4.78501
														155800	-8.80049	1.9918	-1.17047	4.87914
														155900	-8.91126	1.90147	-0.899089	4.96707
														156000	-9.05668	1.73825	-0.650421	5.01974
														156100	-9.18912	1.5007	-0.425564	5.0381
														156200	-9.31399	1.22666	-0.250292	5.0327
														156300	-9.44934	0.942349	-0.112581	4.99849
														156400	-9.60112	0.656263	0.0194467	4.96292
														156500	-9.74954	0.399037	0.179266	4.92477
														156600	-9.84101	0.145953	0.3234	4.88295
														156700	-9.94212	-0.0393062	0.445653	4.85989
														156800	-9.99623	-0.180967	0.533981	4.83244
														156900	-9.97406	-0.295658	0.622748	4.81021
														157000	-9.88673	-0.376292	0.698439	4.78923
														157100	-9.78142	-0.409165	0.739459	4.78725
														157200	-9.64193	-0.411105	0.690725	4.78751
														157300	-9.52592	-0.35498	0.64098	4.79753
														157400	-9.40756	-0.293921	0.575084	4.79585
														157500	-9.2662	-0.202621	0.509258	4.78997
														157600	-9.04986	-0.142029	0.455784	4.78745
														157700	-8.91254	-0.117715	0.439743	4.76972
														157800	-8.76219	-0.107385	0.464162	4.74986
														157900	-8.63095	-0.116024	0.496263	4.74043
														158000	-8.57403	-0.163675	0.53402	4.74429
														158100	-8.54561	-0.228236	0.595239	4.7709
														158200	-8.55187	-0.288204	0.6481	4.82056
														158300	-8.5953	-0.350742	0.700617	4.88304
														158400	-8.65173	-0.398341	0.766394	4.9651
														158500	-8.70208	-0.42023	0.832214	5.05882
														158600	-8.75303	-0.432296	0.88978	5.17362
														158700	-8.79518	-0.444527	0.948364	5.30618
														158800	-8.83764	-0.438712	1.00521	5.44657
														158900	-8.83434	-0.439578	1.05218	5.58207
														159000	-8.80573	-0.433398	1.077	5.70623
														159100	-8.76541	-0.406148	1.08984	5.8193
														159200	-8.72564	-0.360374	1.09847	5.91292
														159300	-8.68864	-0.298638	1.12023	5.98981
														159400	-8.6527	-0.283705	1.13589	6.04251
														159500	-8.59698	-0.291405	1.12647	6.08648
														159600	-8.54787	-0.310572	1.08692	6.12515
														159700	-8.55187	-0.3563	1.02882	6.15683
														159800	-8.57556	-0.373461	0.957388	6.17398
														159900	-8.59901	-0.344823	0.871047	6.19607
														160000	-8.62164	-0.39031	0.758975	6.24118
														160100	-8.64753	-0.414561	0.623029	6.30716
														160200	-8.64728	-0.427411	0.43111	6.32291
														160300	-8.59507	-0.520763	0.221136	6.36376
														160400	-8.44278	-0.689957	0.0221378	6.34818
														160500	-8.1936	-0.957934	-0.174155	6.29368
														160600	-7.8555	-1.38139	-0.390733	6.23298
														160700	-7.39154	-1.93751	-0.608855	6.14936
														160800	-6.83424	-2.60547	-0.842398	6.04162
														160900	-6.18541	-3.46314	-1.05801	5.8637
														161000	-5.47963	-4.49197	-1.25102	5.66752
														161100	-4.76638	-5.61392	-1.47389	5.47513
														161200	-4.07903	-6.77751	-1.66519	5.27602
														161300	-3.44679	-8.00587	-1.85911	5.08747
														161400	-2.90339	-9.22718	-2.03312	4.91133
														161500	-2.44701	-10.3832	-2.15362	4.75013
														161600	-2.14994	-11.5247	-2.26326	4.60369
														161700	-1.99056	-12.5778	-2.35542	4.48645
														161800	-1.94204	-13.4087	-2.44258	4.38442
														161900	-1.98252	-14.0896	-2.50782	4.34861
														162000	-2.0925	-14.65	-2.57924	4.3298
														162100	-2.25255	-14.9474	-2.68308	4.29711
														162200	-2.46054	-15.0844	-2.80548	4.24591
														162300	-2.67601	-15.0765	-2.88083	4.15281
														162400	-2.78597	-14.9475	-2.93866	4.07882
														162500	-2.86343	-14.7496	-2.99939	3.99814
														162600	-2.87612	-14.5076	-3.05827	3.87648
														162700	-2.77628	-14.2343	-3.08253	3.67642
														162800	-2.52885	-13.9719	-3.06955	3.40178
														162900	-2.16211	-13.7345	-2.99057	3.01239
														163000	-1.72096	-13.5221	-2.8992	2.62784
														163100	-1.28258	-13.3127	-2.76941	2.18522
														163200	-0.830731	-13.1478	-2.55059	1.67596
														163300	-0.375659	-13.0591	-2.30083	1.15222
														163400	0.077012	-13.0059	-2.02678	0.638602
														163500	0.477958	-12.9833	-1.72816	0.137567
														163600	0.821759	-13.0049	-1.42357	-0.291779
														163700	1.13487	-12.9861	-1.14889	-0.624968
														163800	1.42828	-12.9588	-0.876229	-0.900667
														163900	1.67666	-12.9121	-0.603987	-1.09178
														164000	1.88346	-12.8482	-0.403315	-1.25066
														164100	2.05975	-12.773	-0.26258	-1.35421
														164200	2.23088	-12.6729	-0.133003	-1.36316
														164300	2.4082	-12.5627	-0.0215798	-1.37913
														164400	2.6283	-12.4543	0.0602705	-1.35041
														164500	2.84157	-12.3486	0.109802	-1.28633
														164600	3.03554	-12.2285	0.12193	-1.22753
														164700	3.31562	-12.1209	0.0936729	-1.22142
														164800	3.54991	-11.999	0.0317744	-1.15838
														164900	3.71288	-11.8941	-0.0460734	-1.09449
														165000	3.81132	-11.8159	-0.130506	-1.00335
														165100	3.84765	-11.7494	-0.202406	-0.916216
														165200	3.83276	-11.7077	-0.263588	-0.804438
														165300	3.72491	-11.6688	-0.351772	-0.638251
														165400	3.5792	-11.6424	-0.455916	-0.426878
														165500	3.30991	-11.6147	-0.515737	-0.186559
														165600	3.01927	-11.5814	-0.546397	0.126999
														165700	2.77699	-11.5403	-0.570761	0.443073
														165800	2.5588	-11.4758	-0.572792	0.767272
														165900	2.35907	-11.4103	-0.541086	1.09209
														166000	2.21186	-11.3416	-0.493708	1.39041
														166100	2.12143	-11.2646	-0.425992	1.65534
														166200	2.07918	-11.1747	-0.34332	1.87596
														166300	2.08327	-11.0858	-0.250822	2.06813
														166400	2.12767	-10.9978	-0.158308	2.23242
														166500	2.19642	-10.9083	-0.0738802	2.37551
														166600	2.2508	-10.8238	-0.0314893	2.48992
														166700	2.25779	-10.7873	-0.00971982	2.53692
														166800	2.25757	-10.7674	0.0112068	2.60211
														166900	2.25604	-10.7658	0.0310849	2.59755
														167000	2.26039	-10.7636	0.0493922	2.57863
														167100	2.27031	-10.7676	0.0443404	2.54761
														167200	2.26617	-10.7821	0.0175718	2.50616
														167300	2.25101	-10.8032	-0.0235428	2.46794
														167400	2.25573	-10.8217	-0.0791863	2.37833
														167500	2.30438	-10.8732	-0.136025	2.24414
														167600	2.36575	-10.9295	-0.174721	2.0797
														167700	2.41347	-10.9834	-0.245237	1.88153
														167800	2.45284	-11.0339	-0.376584	1.66373
														167900	2.47659	-11.0621	-0.535468	1.43824
														168000	2.46921	-11.0736	-0.708019	1.21685
														168100	2.3791	-11.0768	-0.893866	1.02481
														168200	2.21929	-11.0694	-1.10294	0.835371
														168300	2.02329	-11.0492	-1.36268	0.648487
														168400	1.76602	-10.9998	-1.69147	0.442006
														168500	1.48575	-10.9377	-2.04186	0.221244
														168600	1.12498	-10.8783	-2.42677	0.00232285
														168700	0.71272	-10.8294	-2.88776	-0.230085
														168800	0.28018	-10.7673	-3.39004	-0.480858
														168900	-0.156009	-10.7075	-3.90744	-0.731675
														169000	-0.582838	-10.6384	-4.47761	-1.02167
														169100	-0.987387	-10.579	-5.04769	-1.31785
														169200	-1.35559	-10.5383	-5.61856	-1.66815
														169300	-1.70109	-10.54	-6.16625	-2.09654
														169400	-2.0672	-10.5897	-6.71974	-2.53138
														169500	-2.4727	-10.6963	-7.23194	-2.9799
														169600	-2.8937	-10.8391	-7.72072	-3.41704
														169700	-3.39327	-11.0363	-8.20602	-3.86304
														169800	-3.95056	-11.2295	-8.64164	-4.2515
														169900	-4.61895	-11.4245	-8.97669	-4.59921
														170000	-5.38948	-11.6372	-9.22709	-4.946
														170100	-6.2218	-11.8539	-9.41383	-5.25227
														170200	-7.06259	-12.0603	-9.53347	-5.58413
														170300	-7.90474	-12.2424	-9.59993	-5.89589
														170400	-8.75251	-12.3883	-9.61708	-6.17524
														170500	-9.54808	-12.5158	-9.57783	-6.41245
														170600	-10.2963	-12.621	-9.52919	-6.58677
														170700	-11.0109	-12.6683	-9.4784	-6.74764
														170800	-11.6279	-12.6258	-9.37383	-6.90558
														170900	-12.1101	-12.5793	-9.24829	-7.01196
														171000	-12.4662	-12.5339	-9.15361	-7.11496
														171100	-12.6942	-12.4886	-9.05991	-7.15588
														171200	-12.8139	-12.4532	-8.99049	-7.19514
														171300	-12.7485	-12.4458	-8.92579	-7.24546
														171400	-12.6541	-12.5273	-8.90465	-7.25512
														171500	-12.5176	-12.6483	-8.89345	-7.25988
														171600	-12.2712	-12.799	-8.90565	-7.25876
														171700	-12.045	-12.9813	-8.93307	-7.26375
														171800	-11.7676	-13.1496	-8.95599	-7.21535
														171900	-11.4907	-13.3158	-8.98679	-7.18926
														172000	-11.1834	-13.4778	-9.00883	-7.17182
														172100	-10.8764	-13.6341	-9.0253	-7.14696
														172200	-10.6032	-13.775	-9.04776	-7.12266
														172300	-10.383	-13.8901	-9.06723	-7.07233
														172400	-10.223	-13.9828	-9.09351	-7.02031
														172500	-10.1184	-14.0478	-9.10607	-7.00771
														172600	-10.0716	-14.0844	-9.09747	-7.00317
														172700	-10.0553	-14.0948	-9.09286	-7.00996
														172800	-10.0392	-14.0907	-9.05171	-7.02915
														172900	-10.0231	-14.1028	-9.02935	-7.01777
														173000	-10.0471	-14.1127	-9.01469	-7.01621
														173100	-10.0217	-14.1413	-9.00939	-7.00806
														173200	-9.99913	-14.1905	-9.01119	-7.01648
														173300	-10.0052	-14.215	-9.03226	-7.03925
														173400	-10.0032	-14.2263	-9.07159	-7.03894
														173500	-10.0326	-14.2	-9.12492	-7.06979
														173600	-10.0636	-14.1258	-9.20567	-7.11318
														173700	-10.112	-14.0218	-9.30479	-7.16001
														173800	-10.177	-13.8823	-9.42692	-7.22708
														173900	-10.2736	-13.6819	-9.57006	-7.31493
														174000	-10.3861	-13.4433	-9.72483	-7.45956
														174100	-10.5073	-13.1835	-9.88706	-7.62206
														174200	-10.6375	-12.9041	-10.0524	-7.79799
														174300	-10.7775	-12.6175	-10.1823	-8.01937
														174400	-10.9224	-12.3394	-10.283	-8.24563
														174500	-11.0613	-12.072	-10.3511	-8.4442
														174600	-11.1576	-11.833	-10.4067	-8.6571
														174700	-11.248	-11.6241	-10.4422	-8.83988
														174800	-11.343	-11.4665	-10.4418	-8.96773
														174900	-11.4332	-11.3631	-10.4372	-9.10525
														175000	-11.4863	-11.3059	-10.422	-9.2243
														175100	-11.5211	-11.2867	-10.4179	-9.32593
														175200	-11.5682	-11.3059	-10.4096	-9.4204
														175300	-11.613	-11.3194	-10.3608	-9.48647
														175400	-11.6124	-11.2835	-10.2767	-9.51181
														175500	-11.5355	-11.2913	-10.2057	-9.49798
														175600	-11.349	-11.3402	-10.1355	-9.44563
														175700	-10.9971	-11.4193	-10.0799	-9.35143
														175800	-10.5502	-11.5199	-10.0492	-9.23748
														175900	-9.85422	-11.6941	-10.0397	-9.10302
														176000	-9.00663	-11.9247	-10.0506	-8.96926
														176100	-8.10576	-12.17	-10.1	-8.80424
														176200	-7.16536	-12.42	-10.1749	-8.63319
														176300	-6.20939	-12.6732	-10.257	-8.45547
														176400	-5.27824	-12.9213	-10.3965	-8.28714
														176500	-4.4178	-13.1455	-10.5665	-8.1518
														176600	-3.6606	-13.3458	-10.6591	-8.04388
														176700	-3.04417	-13.5106	-10.7496	-7.93903
														176800	-2.56745	-13.6418	-10.8379	-7.87245
														176900	-2.22187	-13.7325	-10.9786	-7.79557
														177000	-2.01783	-13.787	-10.9946	-7.70337
														177100	-1.9678	-13.7926	-10.9794	-7.63297
														177200	-2.0087	-13.7652	-10.8859	-7.58922
														177300	-2.13066	-13.729	-10.7103	-7.50051
														177400	-2.28959	-13.6666	-10.4716	-7.40312
														177500	-2.44493	-13.6291	-10.1716	-7.30687
														177600	-2.57212	-13.5819	-9.83325	-7.21039
														177700	-2.6563	-13.5509	-9.47832	-7.10392
														177800	-2.67764	-13.5545	-9.14313	-7.00663
														177900	-2.65459	-13.5615	-8.84556	-6.90985
														178000	-2.63944	-13.5728	-8.59899	-6.81519
														178100	-2.65967	-13.592	-8.4111	-6.72797
														178200	-2.695	-13.6137	-8.2611	-6.66461
														178300	-2.74823	-13.6278	-8.15032	-6.62168
														178400	-2.80832	-13.6451	-8.08459	-6.59688
														178500	-2.88505	-13.6652	-8.05323	-6.58907
														178600	-2.96754	-13.6866	-8.07817	-6.57933
														178700	-3.05084	-13.7182	-8.05748	-6.53786
														178800	-3.1346	-13.764	-8.04236	-6.4981
														178900	-3.21782	-13.8139	-8.03272	-6.45207
														179000	-3.29682	-13.8591	-8.01962	-6.41732
														179100	-3.3696	-13.8974	-8.02837	-6.43121
														179200	-3.43899	-13.9432	-8.04113	-6.45415
														179300	-3.49703	-13.9799	-8.05047	-6.46698
														179400	-3.54044	-14.0003	-8.06259	-6.48659
														179500	-3.58032	-14.0088	-8.07542	-6.50965
														179600	-3.61024	-13.9982	-8.06011	-6.51518
														179700	-3.62435	-13.9785	-8.03533	-6.51181
														179800	-3.61742	-13.9504	-8.02276	-6.51319
														179900	-3.59085	-13.9092	-8.03148	-6.51936
														180000	-3.55855	-13.8591	-8.08458	-6.53784
														180100	-3.51419	-13.8137	-8.15295	-6.56623
														180200	-3.46501	-13.761	-8.2271	-6.59314
														180300	-3.41895	-13.7137	-8.28302	-6.66486
														180400	-3.37326	-13.6789	-8.34006	-6.76142
														180500	-3.33105	-13.6545	-8.40609	-6.85844
														180600	-3.29479	-13.6445	-8.49681	-6.90102
														180700	-3.27336	-13.6563	-8.61749	-6.86703
														180800	-3.25785	-13.6726	-8.78709	-6.7673
														180900	-3.2487	-13.6862	-8.98364	-6.53008
														181000	-3.24665	-13.7014	-9.19571	-6.15785
														181100	-3.24914	-13.725	-9.39943	-5.67194
														181200	-3.26041	-13.7389	-9.59677	-5.08342
														181300	-3.26356	-13.7378	-9.79033	-4.40108
														181400	-3.26357	-13.7255	-9.96042	-3.63916
														181500	-3.25716	-13.7084	-10.1023	-2.83291
														181600	-3.24643	-13.6861	-10.1999	-2.00864
														181700	-3.23128	-13.6622	-10.2967	-1.18263
														181800	-3.1971	-13.6337	-10.3765	-0.432726
														181900	-3.16584	-13.6101	-10.4442	0.216147
														182000	-3.14792	-13.5941	-10.4907	0.778513
														182100	-3.1531	-13.591	-10.4684	1.27933
														182200	-3.18467	-13.5971	-10.4156	1.64477
														182300	-3.22552	-13.6117	-10.345	1.85315
														182400	-3.28949	-13.6264	-10.2479	2.03303
														182500	-3.38018	-13.6321	-10.0736	2.13404
														182600	-3.46914	-13.6456	-9.85868	2.17327
														182700	-3.55856	-13.6497	-9.56387	2.29266
														182800	-3.61784	-13.6393	-9.1862	2.48652
														182900	-3.66529	-13.6083	-8.68612	2.68713
														183000	-3.67519	-13.5721	-8.02271	2.89549
														183100	-3.63697	-13.5315	-7.25326	3.10345
														183200	-3.50581	-13.509	-6.42747	3.32496
														183300	-3.32303	-13.4681	-5.55287	3.53356
														183400	-3.12804	-13.428	-4.63511	3.74655
														183500	-2.89702	-13.3877	-3.72418	3.95654
														183600	-2.64197	-13.329	-2.83595	4.16464
														183700	-2.37253	-13.271	-2.00821	4.33587
														183800	-2.11209	-13.2265	-1.22423	4.45505
														183900	-1.862	-13.2053	-0.527582	4.55648
														184000	-1.64512	-13.1948	0.0726618	4.65213
														184100	-1.46452	-13.1988	0.565795	4.71558
														184200	-1.3094	-13.2105	0.939532	4.74611
														184300	-1.17904	-13.2235	1.22336	4.76062
														184400	-1.08498	-13.2454	1.44309	4.78152
														184500	-1.02293	-13.2749	1.63562	4.77986
														184600	-0.974547	-13.3193	1.7577	4.79848
														184700	-0.945342	-13.3521	1.87533	4.84186
														184800	-0.919554	-13.3845	2.0144	4.90923
														184900	-0.913295	-13.416	2.14253	4.9713
														185000	-0.872055	-13.457	2.23861	5.02174
														185100	-0.821969	-13.508	2.22806	5.05827
														185200	-0.777063	-13.5585	2.15237	5.10536
														185300	-0.743129	-13.5752	2.03715	5.12713
														185400	-0.734808	-13.5824	1.9317	5.10968
														185500	-0.738974	-13.581	1.82286	5.05704
														185600	-0.749877	-13.5617	1.74533	4.97197
														185700	-0.766633	-13.5406	1.62686	4.87688
														185800	-0.787929	-13.5378	1.50501	4.77229
														185900	-0.797127	-13.5337	1.34655	4.67344
														186000	-0.802026	-13.5254	1.15037	4.59355
														186100	-0.808972	-13.5203	0.944648	4.52134
														186200	-0.817136	-13.5164	0.725453	4.46702
														186300	-0.825748	-13.5178	0.527049	4.41448
														186400	-0.83416	-13.5201	0.365399	4.37044
														186500	-0.841699	-13.5214	0.221113	4.35041
														186600	-0.84728	-13.5249	0.133277	4.33326
														186700	-0.849922	-13.5277	0.0756272	4.34018
														186800	-0.851154	-13.5308	0.0359671	4.36268
														186900	-0.851511	-13.535	-0.0648505	4.40243
														187000	-0.850882	-13.5403	-0.160264	4.42997
														187100	-0.852961	-13.5432	-0.237275	4.44967
														187200	-0.855329	-13.5464	-0.281125	4.47537
														187300	-0.856709	-13.5501	-0.276907	4.49199
														187400	-0.858194	-13.5528	-0.228697	4.49287
														187500	-0.858323	-13.5558	-0.157591	4.48226
														187600	-0.85842	-13.5587	-0.0893685	4.48059
														187700	-0.858145	-13.5621	-0.0804853	4.47684
														187800	-0.858805	-13.5661	-0.0518091	4.47736
														187900	-0.858063	-13.5717	-0.0479392	4.49758
														188000	-0.861256	-13.5846	-0.0544742	4.51545
														188100	-0.863025	-13.5932	-0.0486076	4.52195
														188200	-0.864421	-13.6023	-0.0514358	4.52938
														188300	-0.860288	-13.5953	-0.0388557	4.52725
														188400	-0.855376	-13.575	-0.0306938	4.52709
														188500	-0.855992	-13.5602	-0.0607113	4.53463
														188600	-0.864024	-13.5437	-0.0825756	4.53729
														188700	-0.882576	-13.5357	-0.136058	4.56299
														188800	-0.89989	-13.554	-0.164051	4.60739
														188900	-0.936038	-13.5765	-0.159703	4.65186
														189000	-0.98106	-13.5987	-0.13132	4.70211
														189100	-1.04445	-13.6167	-0.102199	4.73569
														189200	-1.11944	-13.624	-0.0462308	4.77481
														189300	-1.22617	-13.641	0.0583707	4.77107
														189400	-1.34188	-13.6679	0.238148	4.70475
														189500	-1.45683	-13.695	0.495734	4.55802
														189600	-1.56583	-13.7262	0.848915	4.35002
														189700	-1.65665	-13.7523	1.24386	4.05923
														189800	-1.72958	-13.7769	1.6778	3.74302
														189900	-1.79388	-13.8024	2.13659	3.41016
														190000	-1.86148	-13.8273	2.64412	3.04488
														190100	-1.90067	-13.8436	3.18135	2.67302
														190200	-1.93292	-13.8536	3.71608	2.30615
														190300	-1.96494	-13.8507	4.2369	1.97145
														190400	-1.96822	-13.8454	4.6838	1.67531
														190500	-1.95609	-13.8679	5.0694	1.42835
														190600	-1.93227	-13.8928	5.40611	1.24322
														190700	-1.93691	-13.9236	5.69528	1.12152
														190800	-1.95518	-13.9611	5.95206	1.05898
														190900	-1.97272	-13.9817	6.15048	1.03386
														191000	-1.98562	-13.9829	6.30358	1.04775
														191100	-2.00934	-13.9826	6.42911	1.07442
														191200	-2.02149	-13.9798	6.4986	1.09769
														191300	-2.04855	-13.9969	6.6112	1.07381
														191400	-2.06821	-14.0026	6.73764	1.04379
														191500	-2.09707	-14.0063	6.83655	0.993211
														191600	-2.12501	-14.0092	6.90657	0.973069
														191700	-2.14103	-14.0069	6.91312	1.00088
														191800	-2.16567	-13.9948	6.88554	1.07146
														191900	-2.19687	-13.9897	6.83808	1.13111
														192000	-2.22045	-13.996	6.77585	1.14575
														192100	-2.23548	-14.0146	6.67677	1.13797
														192200	-2.22706	-14.0451	6.55822	1.13037
														192300	-2.20403	-14.0841	6.40784	1.13629
														192400	-2.16108	-14.1403	6.23441	1.16632
														192500	-2.11385	-14.2054	6.06221	1.22579
														192600	-2.06539	-14.2814	5.89749	1.32467
														192700	-2.00342	-14.3643	5.75858	1.46697
														192800	-1.93582	-14.4447	5.66432	1.61321
														192900	-1.85704	-14.5167	5.59998	1.69499
														193000	-1.77296	-14.5719	5.56286	1.68302
														193100	-1.68631	-14.6153	5.45889	1.55426
														193200	-1.60433	-14.6524	5.29076	1.32848
														193300	-1.5492	-14.6883	5.0449	0.95163
														193400	-1.5139	-14.7083	4.66902	0.437515
														193500	-1.50507	-14.7207	4.15578	-0.143662
														193600	-1.49813	-14.7122	3.46094	-0.767771
														193700	-1.49931	-14.7128	2.66473	-1.46296
														193800	-1.52807	-14.6944	1.7927	-2.27697
														193900	-1.56543	-14.6753	0.814781	-3.12902
														194000	-1.58743	-14.6679	-0.239893	-3.94495
														194100	-1.58001	-14.6681	-1.31617	-4.71438
														194200	-1.55636	-14.6752	-2.3714	-5.38797
														194300	-1.54872	-14.6776	-3.3773	-5.94268
														194400	-1.54793	-14.6775	-4.27832	-6.34349
														194500	-1.5512	-14.6644	-5.06754	-6.59846
														194600	-1.56875	-14.6449	-5.75074	-6.72179
														194700	-1.56024	-14.6171	-6.31522	-6.72643
														194800	-1.59168	-14.5962	-6.80751	-6.65712
														194900	-1.6056	-14.5464	-7.23488	-6.54956
														195000	-1.63234	-14.513	-7.58537	-6.41601
														195100	-1.64152	-14.4804	-7.90141	-6.31597
														195200	-1.63814	-14.4562	-8.20403	-6.12999
														195300	-1.62344	-14.4391	-8.52563	-5.93623
														195400	-1.61224	-14.417	-8.84047	-5.71951
														195500	-1.62157	-14.3976	-9.10435	-5.40653
														195600	-1.6365	-14.3838	-9.35815	-5.0325
														195700	-1.63919	-14.3763	-9.59066	-4.58527
														195800	-1.62803	-14.3974	-9.82589	-4.07816
														195900	-1.58618	-14.4455	-10.042	-3.47796
														196000	-1.5112	-14.4923	-10.2148	-2.79414
														196100	-1.43875	-14.5335	-10.3286	-2.084
														196200	-1.3792	-14.573	-10.3863	-1.41382
														196300	-1.33803	-14.5963	-10.4217	-0.83645
														196400	-1.30564	-14.5718	-10.4197	-0.350767
														196500	-1.28604	-14.5509	-10.4191	0.0530535
														196600	-1.27591	-14.5423	-10.4268	0.336468
														196700	-1.25168	-14.541	-10.4484	0.520373
														196800	-1.26197	-14.5495	-10.4598	0.674527
														196900	-1.24038	-14.54	-10.4452	0.727549
														197000	-1.22784	-14.574	-10.3963	0.742904
														197100	-1.18762	-14.5988	-10.3332	0.787657
														197200	-1.14024	-14.6394	-10.2822	0.700567
														197300	-1.10502	-14.6874	-10.2536	0.742837
														197400	-1.09337	-14.7327	-10.2214	0.78843
														197500	-1.08132	-14.7899	-10.1747	0.821513
														197600	-1.03716	-14.8641	-10.1336	0.866546
														197700	-0.972998	-14.9424	-10.0927	0.912513
														197800	-0.902941	-15.0242	-10.0563	0.960626
														197900	-0.834141	-15.1007	-10.0165	1.01776
														198000	-0.766385	-15.1585	-9.98382	1.07415
														198100	-0.716634	-15.1883	-9.95904	1.12227
														198200	-0.672088	-15.2126	-9.94152	1.16405
														198300	-0.633088	-15.2298	-9.93248	1.19674
														198400	-0.601636	-15.2369	-9.93114	1.22103
														198500	-0.566438	-15.266	-9.93652	1.22053
														198600	-0.533266	-15.2854	-9.94273	1.21765
														198700	-0.511714	-15.296	-9.95114	1.20476
														198800	-0.50133	-15.2896	-9.9554	1.19797
														198900	-0.501746	-15.281	-9.95294	1.20375
														199000	-0.494494	-15.2752	-9.96202	1.19167
														199100	-0.487038	-15.2705	-9.96876	1.18292
														199200	-0.477343	-15.2619	-9.97466	1.18239
														199300	-0.476107	-15.2469	-9.99072	1.16176
														199400	-0.477694	-15.2199	-10.0134	1.14451
														199500	-0.471507	-15.2013	-10.0371	1.1241
														199600	-0.470935	-15.1885	-10.0418	1.12077
[truncated: 1,005 more rows]
[truncated: 12 more columns]
