# Supplementary material for: Motor thalamus supports striatum-driven reinforcement
Source: eLife. 2018 Oct 8;7:e34032. doi: 10.7554/eLife.34032 (PMC6181560; doi:10.7554/eLife.34032)
Supplement: Figure 6—source data 1. [file elife-34032-fig6-data1.xlsx]

## Sheet: Figure 6
Figure 6		exc
	unit number sorted by mod index as in Fig6b	0	1	2	3	4	5	6	7	8	9	10	11	12	13	14	15	16	17	18	19	20	21	22	23	24	25	26	27	28	29	30	31	32	33	34	35	36	37	38	39	40	41	42	43	44	45	46	47
opto on from 0 to 1s	time bin (s) relative to opto onset	spikes per 10ms bin
	-1	0.02	0	0.1	0.01	0.04	0.1	0.03	0.01	0.05	0.08	0.05	0.08	0.07	0.04	0.11	0.03	0.11	0.11	0.06	0.04	0.07	0.05	0.06	0.07	0.1	0.11	0.05	0.06	0.06	0.08	0.14	0.15	0.15	0.07	0.2	0.08	0.08	0.17	0.17	0.12	0	0.08	0.14	0.1	0.08	0.09	0.23	0.11
	-0.99	0.01	0.01	0.07	0.01	0.02	0.04	0.05	0	0.08	0.05	0.03	0.07	0.09	0.04	0.09	0.05	0.13	0.13	0.05	0.04	0.03	0.07	0.1	0.08	0.1	0.05	0.04	0.13	0.07	0	0.12	0.09	0.1	0.09	0.2	0.22	0.06	0.18	0.12	0.06	0	0.15	0.11	0.03	0.06	0.12	0.2	0.1
	-0.98	0	0.01	0.03	0.01	0.04	0.03	0.04	0.02	0.07	0.03	0.06	0.06	0.08	0.06	0.09	0.06	0.07	0.11	0.03	0.03	0.06	0.08	0.05	0.09	0.13	0.05	0	0.11	0.09	0.02	0.04	0.09	0.12	0.08	0.13	0.18	0.06	0.14	0.07	0.13	0.01	0.15	0.11	0.03	0.03	0.09	0.14	0.12
	-0.97	0	0.02	0.04	0.01	0.01	0.05	0.04	0.01	0.01	0.03	0.05	0.05	0.07	0.06	0.05	0.07	0.18	0.1	0.06	0.01	0.02	0.09	0.05	0.1	0.07	0.02	0.09	0.09	0.09	0.05	0.17	0.12	0.1	0.04	0.13	0.14	0.11	0.17	0.1	0.08	0	0.12	0.09	0.06	0.04	0.09	0.26	0.07
	-0.96	0.02	0.02	0.06	0.03	0.01	0.04	0.02	0.01	0.02	0.05	0.08	0.11	0.08	0.05	0.04	0.08	0.13	0.11	0.02	0	0.06	0.04	0.03	0.1	0.07	0.07	0.07	0.14	0.07	0.02	0.11	0.11	0.07	0.05	0.16	0.15	0.03	0.17	0.09	0.13	0.01	0.09	0.11	0.06	0.07	0.09	0.21	0.15
	-0.95	0	0.01	0.08	0.02	0.02	0.07	0.05	0.01	0.04	0.04	0.01	0.04	0.06	0.05	0.08	0.06	0.19	0.15	0.02	0.03	0.06	0.06	0.08	0.06	0.04	0.12	0.03	0.08	0.05	0.04	0.09	0.1	0.06	0.04	0.24	0.11	0.07	0.19	0.12	0.12	0.02	0.08	0.13	0.1	0.06	0.09	0.17	0.1
	-0.94	0.02	0.01	0.03	0.01	0.01	0.01	0.05	0	0.06	0.04	0.05	0.04	0.06	0.03	0.05	0.06	0.08	0.12	0.07	0.03	0.05	0.06	0.07	0.09	0.12	0.08	0.02	0.07	0.08	0.03	0.12	0.14	0.08	0.1	0.12	0.12	0.05	0.16	0.08	0.08	0.01	0.1	0.19	0.04	0.05	0.11	0.15	0.12
	-0.93	0.01	0.01	0.05	0.02	0.03	0.04	0.09	0.01	0.07	0.03	0.08	0.03	0.1	0.05	0.09	0.06	0.17	0.09	0.04	0.02	0.05	0.07	0.08	0.11	0.06	0.03	0.09	0.13	0.1	0.01	0.1	0.07	0.11	0.05	0.16	0.15	0.07	0.19	0.13	0.13	0.03	0.12	0.1	0.06	0.04	0.04	0.17	0.15
	-0.92	0	0.03	0.05	0	0.01	0.03	0.04	0.02	0.05	0.05	0.04	0.07	0.05	0.07	0.07	0.05	0.16	0.11	0.07	0.03	0.02	0.03	0.08	0.08	0.06	0.07	0.02	0.04	0.11	0.03	0.07	0.1	0.05	0.04	0.08	0.13	0.07	0.16	0.12	0.1	0	0.16	0.12	0.07	0.04	0.11	0.21	0.07
	-0.91	0.04	0	0.07	0	0.04	0.04	0.04	0.03	0.06	0.03	0.06	0.03	0.06	0.04	0.05	0.05	0.14	0.13	0.04	0.03	0.03	0.07	0.07	0.12	0.13	0.05	0.04	0.09	0.04	0.05	0.15	0.1	0.07	0.07	0.18	0.13	0.08	0.17	0.14	0.06	0.02	0.11	0.18	0.05	0.1	0.07	0.25	0.09
	-0.9	0.02	0.01	0.04	0.02	0.01	0.01	0.04	0	0.08	0.06	0.05	0.08	0.06	0.04	0.09	0.08	0.09	0.18	0.04	0.03	0.08	0.06	0.03	0.09	0.05	0.04	0.05	0.05	0.07	0.01	0.08	0.12	0.13	0.1	0.11	0.08	0.05	0.16	0.07	0.06	0.01	0.05	0.12	0.06	0.02	0.04	0.19	0.06
	-0.89	0.01	0.01	0.07	0.02	0.02	0.03	0.07	0.02	0.08	0.08	0.04	0.08	0.12	0.05	0.08	0.06	0.13	0.1	0.06	0	0.06	0.14	0.07	0.08	0.11	0.06	0.04	0.07	0.08	0.03	0.11	0.08	0.12	0.08	0.19	0.1	0.01	0.16	0.09	0.11	0	0.12	0.08	0.08	0.04	0.09	0.21	0.17
	-0.88	0	0.01	0.05	0	0.02	0.02	0.06	0.02	0.07	0.07	0.05	0.05	0.09	0.07	0.1	0.06	0.18	0.17	0.06	0.03	0.06	0.07	0.08	0.12	0.07	0.07	0.01	0.05	0.06	0.01	0.17	0.12	0.06	0.05	0.14	0.11	0.07	0.18	0.13	0.05	0.01	0.05	0.2	0.06	0.06	0.08	0.17	0.13
	-0.87	0.01	0.01	0.06	0	0.04	0.06	0.05	0	0.03	0.06	0.06	0.05	0.06	0.04	0.08	0.06	0.13	0.1	0.05	0.01	0.07	0.08	0.06	0.09	0.15	0.06	0.06	0.09	0.01	0.04	0.08	0.11	0.09	0.05	0.19	0.16	0.08	0.15	0.11	0.05	0.01	0.1	0.13	0.03	0.01	0.07	0.28	0.1
	-0.86	0	0	0.1	0.01	0.02	0.05	0.06	0.01	0.05	0.09	0.04	0.03	0.07	0.11	0.07	0.09	0.15	0.1	0.04	0.02	0.04	0.07	0.1	0.09	0.11	0.07	0.02	0.04	0.07	0.03	0.15	0.12	0.15	0.07	0.2	0.13	0.05	0.16	0.14	0.11	0.02	0.12	0.1	0.06	0.05	0.1	0.25	0.14
	-0.85	0.01	0	0.03	0.02	0.02	0.04	0.07	0.01	0.04	0.05	0.03	0.04	0.12	0.06	0.11	0.05	0.18	0.11	0.04	0.01	0.09	0.06	0.05	0.05	0.08	0.05	0.08	0.06	0.07	0.03	0.14	0.11	0.04	0.04	0.17	0.17	0.06	0.15	0.05	0.06	0.01	0.13	0.12	0.08	0.05	0.05	0.18	0.07
	-0.84	0	0	0.07	0.02	0.02	0.06	0.05	0.01	0.07	0.07	0.03	0.09	0.12	0.06	0.11	0.06	0.17	0.21	0.04	0.02	0.08	0.08	0.04	0.1	0.13	0.07	0.02	0.06	0.09	0.07	0.12	0.1	0.07	0.06	0.23	0.1	0.09	0.16	0.13	0.11	0.01	0.11	0.06	0.09	0.06	0.1	0.16	0.1
	-0.83	0	0.02	0.1	0.01	0.06	0.03	0.06	0.01	0.05	0.05	0.1	0.04	0.07	0.04	0.12	0.01	0.13	0.18	0.02	0.04	0.09	0.07	0.03	0.07	0.07	0.05	0.04	0.08	0.06	0.08	0.14	0.11	0.11	0.05	0.16	0.13	0.07	0.19	0.07	0.12	0.01	0.05	0.11	0.1	0.06	0.1	0.23	0.1
	-0.82	0.01	0.02	0.08	0.02	0.04	0.03	0.04	0.01	0.06	0.1	0.05	0.04	0.08	0.02	0.11	0.08	0.14	0.12	0.07	0.03	0.06	0.07	0.08	0.14	0.08	0.05	0.06	0.06	0.05	0.03	0.14	0.03	0.15	0.08	0.12	0.16	0.11	0.14	0.08	0.16	0.02	0.15	0.19	0.04	0.02	0.05	0.18	0.14
	-0.81	0	0	0.01	0	0.04	0.02	0.05	0.03	0.07	0.07	0.06	0.06	0.03	0.07	0.15	0.04	0.14	0.1	0.05	0.04	0.11	0.03	0.07	0.07	0.07	0.1	0.04	0.16	0.07	0	0.12	0.1	0.1	0.05	0.17	0.13	0.08	0.18	0.11	0.13	0.01	0.13	0.13	0.04	0.06	0.07	0.14	0.06
	-0.8	0.01	0.01	0.04	0.04	0.02	0.04	0.05	0.03	0.06	0.05	0.07	0.06	0.06	0.06	0.07	0.06	0.08	0.19	0.06	0	0.07	0.06	0.05	0.12	0.11	0.05	0.04	0.06	0.05	0.03	0.09	0.05	0.13	0.11	0.22	0.15	0.06	0.14	0.11	0.11	0	0.13	0.1	0.04	0.06	0.07	0.2	0.14
	-0.79	0	0.01	0.04	0.01	0.03	0.05	0.04	0.01	0.06	0.04	0.04	0.07	0.08	0.02	0.06	0.05	0.13	0.08	0.07	0.05	0.05	0.08	0.05	0.08	0.08	0.08	0.04	0.03	0.1	0.05	0.1	0.09	0.15	0.09	0.09	0.06	0.11	0.18	0.11	0.09	0	0.08	0.1	0.04	0.08	0.07	0.17	0.09
	-0.78	0	0.01	0.07	0.01	0.02	0.04	0.05	0	0.09	0.08	0.07	0.08	0.07	0.11	0.09	0.03	0.1	0.15	0.05	0	0.07	0.05	0.07	0.08	0.12	0.05	0.06	0.06	0.08	0.05	0.12	0.18	0.11	0.05	0.19	0.11	0.03	0.2	0.08	0.09	0	0.14	0.12	0.1	0.03	0.06	0.22	0.1
	-0.77	0.01	0.01	0.04	0.01	0.01	0.02	0.06	0.01	0.1	0.05	0.08	0.06	0.1	0.07	0.09	0.02	0.12	0.07	0.08	0.1	0.02	0.06	0.07	0.11	0.08	0.06	0.06	0.12	0.09	0.08	0.12	0.08	0.13	0.09	0.1	0.13	0.06	0.14	0.1	0.13	0.02	0.14	0.12	0.03	0.1	0.13	0.17	0.18
	-0.76	0	0	0.06	0.03	0.04	0.03	0.05	0.02	0.04	0.05	0.05	0.06	0.11	0.07	0.07	0.1	0.1	0.13	0.03	0.03	0.04	0.04	0.07	0.1	0.12	0.14	0.05	0.07	0.02	0.05	0.13	0.08	0.09	0.06	0.18	0.08	0.06	0.21	0.1	0.1	0.03	0.13	0.11	0.03	0.05	0.06	0.21	0.09
	-0.75	0	0	0.05	0.02	0.04	0.03	0.07	0	0.05	0.04	0.05	0.09	0.1	0.11	0.11	0.12	0.11	0.12	0.08	0.02	0.1	0.06	0.05	0.13	0.13	0.01	0.07	0.03	0.11	0.02	0.15	0.11	0.11	0.05	0.16	0.09	0.05	0.16	0.03	0.07	0.02	0.11	0.16	0.08	0.06	0.06	0.19	0.15
	-0.74	0	0	0.05	0.01	0.01	0.02	0.05	0	0.03	0.09	0.06	0.08	0.1	0.08	0.09	0.02	0.13	0.11	0.07	0	0.04	0.08	0.05	0.06	0.16	0.07	0.05	0.05	0.06	0.06	0.11	0.08	0.12	0.04	0.21	0.11	0.08	0.13	0.06	0.06	0	0.18	0.11	0.09	0.02	0.12	0.21	0.17
	-0.73	0	0	0.06	0.01	0.01	0.02	0.07	0	0.11	0.06	0.04	0.09	0.07	0.06	0.09	0.02	0.11	0.1	0.03	0.02	0.1	0.07	0.05	0.06	0.09	0.04	0.08	0.06	0.1	0.04	0.17	0.12	0.11	0.09	0.13	0.15	0.1	0.09	0.08	0.09	0.01	0.16	0.15	0.06	0.03	0.05	0.1	0.09
	-0.72	0	0.02	0.04	0.01	0.04	0.02	0.02	0.01	0.06	0.04	0.04	0.04	0.04	0.06	0.1	0.05	0.15	0.13	0.07	0.03	0.05	0.08	0.04	0.11	0.07	0.05	0.04	0.12	0.02	0.08	0.09	0.09	0.08	0.09	0.15	0.08	0.04	0.18	0.15	0.08	0.01	0.09	0.13	0.1	0.06	0.06	0.19	0.15
	-0.71	0.01	0.03	0.07	0.03	0.07	0.05	0.04	0	0.04	0.08	0.04	0.06	0.05	0.03	0.06	0.09	0.15	0.14	0.06	0.02	0.09	0.01	0.02	0.14	0.07	0.07	0.04	0.04	0.08	0	0.12	0.1	0.07	0.06	0.21	0.08	0.07	0.15	0.08	0.07	0.01	0.17	0.12	0.09	0.08	0.11	0.22	0.12
	-0.7	0.02	0.01	0.05	0.02	0.02	0.01	0.04	0.04	0.07	0.04	0.09	0.06	0.06	0.07	0.13	0.02	0.19	0.15	0.03	0.01	0.06	0.08	0.06	0.04	0.07	0.05	0.03	0.1	0.08	0.03	0.07	0.12	0.1	0.03	0.16	0.13	0.05	0.17	0.07	0.11	0	0.14	0.17	0.09	0.04	0.11	0.21	0.16
	-0.69	0	0.01	0.05	0.04	0.03	0.01	0.05	0.01	0.08	0.07	0.07	0.05	0.13	0.08	0.11	0.06	0.1	0.18	0.02	0.02	0.05	0.06	0.06	0.08	0.09	0.09	0.04	0.03	0.07	0.05	0.21	0.12	0.08	0.08	0.11	0.08	0.08	0.18	0.11	0.1	0	0.08	0.11	0.05	0.06	0.07	0.17	0.12
	-0.68	0.01	0	0.04	0.01	0.02	0.04	0.06	0.02	0.05	0.02	0.07	0.09	0.07	0.03	0.07	0.05	0.17	0.15	0.07	0.03	0.08	0.06	0.04	0.08	0.1	0.07	0.04	0.06	0.06	0.06	0.1	0.14	0.08	0.05	0.19	0.09	0.07	0.12	0.07	0.09	0.01	0.17	0.1	0.09	0.09	0.18	0.14	0.11
	-0.67	0	0.02	0.04	0.03	0.02	0.02	0.03	0.02	0.04	0.05	0.06	0.07	0.08	0.05	0.14	0.07	0.12	0.13	0.05	0	0.08	0.1	0.06	0.08	0.08	0.03	0.03	0.03	0.07	0	0.12	0.12	0.09	0.1	0.12	0.11	0.06	0.14	0.1	0.11	0	0.17	0.23	0.09	0.02	0.12	0.15	0.11
	-0.66	0	0.02	0.08	0.01	0.03	0.06	0.09	0.03	0.05	0.05	0.04	0.11	0.11	0.04	0.08	0.05	0.08	0.12	0	0.03	0.02	0.05	0.04	0.12	0.06	0.05	0.04	0.1	0.08	0.05	0.11	0.11	0.1	0.05	0.13	0.07	0.09	0.15	0.11	0.08	0.02	0.08	0.13	0.09	0	0.1	0.19	0.1
	-0.65	0	0.01	0.02	0	0.02	0.01	0.01	0	0.11	0.07	0.05	0.04	0.04	0.07	0.09	0.04	0.13	0.12	0.09	0.03	0.05	0.1	0.08	0.12	0.05	0.07	0.06	0.07	0.08	0.03	0.13	0.12	0.05	0.07	0.19	0.11	0.04	0.17	0.1	0.15	0.02	0.22	0.11	0.04	0.04	0.08	0.2	0.12
	-0.64	0	0.01	0.06	0.01	0.02	0.01	0.04	0.03	0.08	0.06	0.06	0.03	0.05	0.05	0.09	0.02	0.15	0.09	0.06	0	0.06	0.02	0.05	0.03	0.13	0.06	0.03	0.06	0.06	0.04	0.08	0.11	0.12	0.07	0.16	0.19	0.09	0.14	0.09	0.08	0.02	0.12	0.08	0.09	0.01	0.06	0.24	0.1
	-0.63	0	0	0.02	0.01	0.03	0.05	0.05	0	0.05	0.05	0.06	0.06	0.07	0.06	0.07	0.04	0.14	0.09	0.05	0.06	0.06	0.05	0.04	0.09	0.13	0.07	0.06	0.08	0.06	0.04	0.11	0.05	0.06	0.07	0.21	0.13	0.05	0.15	0.07	0.05	0.01	0.1	0.16	0.02	0.09	0.07	0.2	0.13
	-0.62	0.03	0.01	0.02	0.04	0.05	0.04	0.03	0.01	0.05	0.06	0.06	0.03	0.08	0.06	0.17	0.05	0.13	0.1	0.08	0.01	0.05	0.07	0.06	0.1	0.12	0.05	0.05	0.09	0.07	0.06	0.14	0.08	0.08	0.08	0.11	0.1	0.05	0.08	0.17	0.15	0.03	0.15	0.13	0.06	0.07	0.14	0.2	0.09
	-0.61	0.01	0	0.04	0.01	0.02	0.08	0.05	0.02	0.06	0.03	0.04	0.06	0.1	0.06	0.07	0.06	0.08	0.12	0.05	0	0.05	0.09	0.05	0.08	0.07	0.04	0.03	0.1	0.06	0.03	0.11	0.06	0.1	0.07	0.17	0.07	0.08	0.21	0.11	0.1	0	0.21	0.13	0.07	0.09	0.01	0.16	0.14
	-0.6	0.01	0	0.03	0.01	0.03	0.03	0.04	0	0.07	0.02	0.06	0.04	0.01	0.03	0.09	0.09	0.12	0.18	0.03	0.02	0.01	0.06	0.05	0.07	0.08	0.02	0.03	0.14	0.06	0.04	0.14	0.1	0.07	0.04	0.17	0.13	0.04	0.15	0.1	0.11	0.02	0.13	0.14	0.04	0.05	0.13	0.14	0.1
	-0.59	0	0.01	0.06	0.01	0.03	0.03	0.02	0.02	0.04	0.13	0.07	0.08	0.04	0.08	0.06	0.09	0.1	0.11	0.08	0.01	0.11	0.09	0.06	0.09	0.15	0.07	0.02	0.05	0.11	0.06	0.13	0.03	0.16	0.06	0.2	0.11	0.07	0.19	0.1	0.16	0.01	0.1	0.12	0.07	0.03	0.11	0.18	0.17
	-0.58	0	0.01	0.04	0.03	0.03	0.05	0.06	0	0.09	0.07	0.04	0.06	0.07	0.06	0.07	0.03	0.1	0.1	0.04	0.01	0.08	0.06	0.05	0.11	0.11	0.02	0.04	0.12	0.08	0	0.14	0.11	0.12	0.04	0.15	0.11	0.11	0.16	0.1	0.11	0.02	0.11	0.13	0.04	0.04	0.1	0.27	0.17
	-0.57	0.01	0.01	0.06	0.05	0.03	0.02	0.05	0	0.04	0.04	0.08	0.09	0.1	0.1	0.08	0.05	0.12	0.08	0.05	0.06	0.05	0.08	0.09	0.11	0.08	0.03	0.02	0.08	0.15	0.08	0.1	0.08	0.1	0.06	0.23	0.14	0.09	0.15	0.12	0.11	0.01	0.19	0.18	0.08	0.03	0.09	0.19	0.07
	-0.56	0.01	0	0.08	0.02	0.01	0.04	0.03	0.01	0.08	0.03	0.06	0.08	0.1	0.07	0.08	0.09	0.12	0.15	0.11	0.05	0.04	0.06	0.04	0.1	0.06	0.04	0.03	0.09	0.11	0.05	0.09	0.09	0.06	0.05	0.15	0.16	0.05	0.13	0.12	0.12	0.01	0.18	0.07	0.1	0.05	0.1	0.18	0.11
	-0.55	0	0	0.03	0.02	0.02	0.06	0.05	0.01	0.03	0.03	0.07	0.02	0.1	0.08	0.12	0.03	0.14	0.11	0.06	0.04	0.08	0.07	0.06	0.11	0.12	0.03	0.02	0.1	0.09	0.03	0.13	0.03	0.14	0.02	0.2	0.05	0.05	0.13	0.1	0.1	0.02	0.05	0.15	0.03	0.01	0.1	0.1	0.17
	-0.54	0	0.01	0.03	0.02	0.05	0.05	0.08	0.01	0.08	0.07	0.05	0.06	0.12	0.06	0.11	0.02	0.14	0.09	0.07	0.04	0.07	0.09	0.04	0.08	0.07	0.05	0.04	0.07	0.09	0.04	0.12	0.09	0.08	0.05	0.21	0.13	0.08	0.19	0.07	0.12	0	0.13	0.08	0.09	0.02	0.08	0.2	0.13
	-0.53	0.03	0.02	0.01	0.02	0.05	0.01	0.03	0	0.1	0.06	0.04	0.09	0.09	0.08	0.09	0.05	0.08	0.11	0.04	0.01	0.05	0.11	0.09	0.06	0.13	0.02	0.05	0.09	0.09	0.06	0.11	0.16	0.08	0.03	0.12	0.07	0.05	0.11	0.1	0.07	0.01	0.1	0.15	0.05	0.03	0.09	0.19	0.11
	-0.52	0.01	0	0.06	0.02	0.03	0.04	0.03	0	0.03	0.06	0.05	0.04	0.07	0.07	0.14	0.06	0.11	0.13	0.04	0.02	0.08	0.07	0.09	0.07	0.08	0.04	0.06	0.09	0.09	0.03	0.14	0.06	0.15	0.04	0.2	0.06	0.07	0.17	0.11	0.13	0.02	0.13	0.07	0.08	0.05	0.09	0.13	0.1
	-0.51	0.02	0	0.02	0.03	0.04	0.03	0.02	0	0.09	0.09	0.07	0.11	0.04	0.09	0.06	0.04	0.14	0.1	0.08	0.01	0.07	0.05	0.09	0.1	0.11	0.03	0.06	0.05	0.11	0.03	0.15	0.1	0.09	0.04	0.14	0.17	0.06	0.14	0.1	0.09	0.02	0.06	0.12	0.07	0.03	0.09	0.2	0.18
	-0.5	0.01	0.01	0.06	0.03	0.02	0.04	0.03	0.01	0.03	0.08	0.06	0.07	0.07	0.09	0.11	0.01	0.18	0.1	0.03	0.03	0.05	0.06	0.05	0.08	0.1	0.07	0.03	0.08	0.03	0.02	0.13	0.09	0.11	0.05	0.14	0.11	0.12	0.17	0.11	0.1	0.01	0.11	0.17	0.06	0.02	0.12	0.2	0.1
	-0.49	0.02	0.02	0.03	0.04	0.02	0.03	0.03	0.02	0.06	0.06	0.04	0.07	0.09	0.08	0.11	0.03	0.13	0.1	0.07	0.03	0.05	0.05	0.1	0.09	0.09	0.02	0.03	0.11	0.08	0.02	0.08	0.07	0.11	0.07	0.16	0.08	0.09	0.2	0.07	0.08	0.04	0.09	0.15	0.1	0.08	0.07	0.17	0.12
	-0.48	0.02	0.01	0.02	0.03	0.01	0.07	0.03	0.04	0.05	0.07	0.08	0.13	0.06	0.04	0.08	0.08	0.05	0.14	0.04	0.04	0.1	0.06	0.1	0.16	0.1	0.07	0.03	0.06	0.12	0.04	0.12	0.08	0.11	0.12	0.17	0.11	0.08	0.1	0.08	0.12	0	0.15	0.07	0.07	0.03	0.08	0.12	0.19
	-0.47	0.01	0	0.04	0	0.04	0.04	0.04	0.01	0.06	0.04	0.11	0.08	0.08	0.06	0.05	0.06	0.1	0.09	0.04	0.03	0.04	0.07	0.09	0.09	0.07	0.02	0.02	0.09	0.03	0.03	0.15	0.07	0.09	0.05	0.19	0.15	0.1	0.15	0.06	0.11	0.01	0.14	0.12	0.06	0.05	0.1	0.19	0.1
	-0.46	0.02	0	0.05	0.01	0.03	0.03	0.01	0.02	0.1	0.03	0.07	0.06	0.13	0.04	0.13	0.07	0.13	0.12	0.03	0.01	0.06	0.06	0.08	0.05	0.09	0.07	0.03	0.02	0.06	0.05	0.12	0.11	0.06	0.04	0.14	0.09	0.05	0.19	0.06	0.12	0.03	0.21	0.14	0.03	0.06	0.09	0.19	0.13
	-0.45	0	0.01	0.02	0.01	0.04	0.04	0.05	0.02	0.07	0.09	0.1	0.1	0.1	0.02	0.1	0.05	0.08	0.04	0.07	0.02	0.05	0.05	0.07	0.11	0.11	0.04	0.09	0.07	0.04	0.02	0.12	0.1	0.09	0.08	0.26	0.1	0.08	0.15	0.08	0.14	0.02	0.11	0.11	0.07	0.05	0.09	0.15	0.09
	-0.44	0.01	0	0.04	0.05	0.02	0.05	0.04	0.01	0.04	0.05	0.08	0.1	0.08	0.05	0.11	0.08	0.03	0.07	0.07	0.01	0.08	0.06	0.05	0.09	0.11	0.04	0.06	0.1	0.05	0.02	0.08	0.07	0.13	0.08	0.12	0.09	0.02	0.13	0.11	0.07	0.02	0.11	0.17	0.03	0.05	0.07	0.17	0.09
	-0.43	0	0.01	0.01	0.01	0.01	0.07	0.02	0.01	0.06	0.07	0.08	0.05	0.05	0.07	0.15	0.06	0.08	0.12	0.07	0.04	0.12	0.07	0.06	0.1	0.09	0.07	0.03	0.09	0.07	0.01	0.14	0.09	0.1	0.07	0.16	0.11	0.11	0.12	0.09	0.1	0.01	0.15	0.13	0.11	0.05	0.09	0.16	0.13
	-0.42	0.01	0	0.03	0.03	0.01	0.03	0.03	0	0.12	0.11	0.06	0.09	0.09	0.05	0.07	0.04	0.1	0.05	0.05	0.06	0.1	0.1	0.13	0.08	0.11	0.06	0.06	0.05	0.03	0.03	0.07	0.11	0.11	0.12	0.13	0.1	0.08	0.19	0.11	0.15	0.01	0.08	0.16	0.06	0.07	0.07	0.11	0.12
	-0.41	0.02	0	0.07	0	0.04	0.04	0.12	0.04	0.03	0.07	0.07	0.07	0.05	0.03	0.07	0.05	0.1	0.14	0.06	0	0.08	0.06	0.07	0.07	0.07	0.09	0.07	0.05	0.09	0.01	0.13	0.1	0.05	0.05	0.2	0.12	0.06	0.12	0.08	0.13	0	0.08	0.1	0.07	0.09	0.09	0.13	0.13
	-0.4	0	0.03	0.04	0.02	0.03	0	0.06	0.01	0.06	0.05	0.06	0.06	0.05	0.02	0.07	0.07	0.09	0.07	0.11	0.04	0.07	0.07	0.08	0.1	0.08	0.05	0.05	0.08	0.07	0.05	0.11	0.07	0.06	0.04	0.14	0.1	0.03	0.21	0.12	0.12	0.03	0.14	0.15	0.02	0.08	0.11	0.21	0.09
	-0.39	0	0	0.06	0.02	0.01	0.06	0.05	0.02	0.08	0.07	0.02	0.09	0.09	0.07	0.07	0.07	0.07	0.06	0.07	0	0.12	0.08	0.05	0.07	0.14	0.07	0.07	0.11	0.07	0.03	0.12	0.1	0.07	0.04	0.14	0.11	0.07	0.15	0.09	0.09	0.01	0.14	0.15	0.07	0.06	0.12	0.12	0.14
	-0.38	0	0	0.06	0.05	0.01	0.02	0.06	0	0.09	0.05	0.09	0.05	0.04	0.04	0.1	0.05	0.11	0.15	0.04	0.03	0.06	0.07	0.05	0.04	0.07	0.07	0.03	0.1	0.05	0.09	0.15	0.05	0.14	0.08	0.11	0.11	0.09	0.15	0.15	0.13	0.01	0.14	0.11	0.08	0.02	0.07	0.15	0.13
	-0.37	0	0.01	0.06	0.01	0.01	0.03	0.13	0.01	0.06	0.06	0.09	0.06	0.08	0.07	0.11	0.07	0.12	0.12	0.05	0.03	0.03	0.1	0.04	0.09	0.05	0.05	0.07	0.06	0.05	0.07	0.1	0.07	0.1	0.06	0.17	0.13	0.06	0.18	0.08	0.19	0.02	0.05	0.2	0.12	0.06	0.08	0.13	0.12
	-0.36	0	0	0.04	0.02	0.02	0.02	0.04	0.05	0.05	0.06	0.03	0.11	0.02	0.07	0.07	0.06	0.14	0.08	0.05	0.02	0.09	0.03	0.05	0.11	0.12	0.12	0.08	0.05	0.08	0	0.09	0.12	0.06	0.08	0.14	0.14	0.07	0.18	0.1	0.08	0.03	0.13	0.12	0.08	0.08	0.04	0.25	0.2
	-0.35	0.01	0	0.05	0.02	0.02	0.06	0.05	0.03	0.04	0.11	0.05	0.04	0.03	0.05	0.12	0.02	0.1	0.14	0.06	0.01	0.07	0.16	0.07	0.15	0.05	0.05	0.09	0.09	0.04	0.15	0.08	0.12	0.16	0.04	0.18	0.12	0.09	0.16	0.13	0.08	0.02	0.13	0.1	0.05	0.05	0.09	0.12	0.09
	-0.34	0.01	0	0.03	0.01	0.03	0.06	0.03	0.01	0.07	0.08	0.06	0.07	0.08	0.06	0.07	0.08	0.12	0.1	0.08	0.02	0.09	0.08	0.1	0.1	0.12	0.04	0.09	0.04	0.12	0.02	0.17	0.09	0.12	0.1	0.16	0.15	0.05	0.21	0.12	0.15	0	0.14	0.12	0.12	0.08	0.09	0.16	0.12
	-0.33	0.01	0.02	0.05	0.01	0.02	0.02	0.04	0.01	0.07	0.05	0.03	0.09	0.08	0.04	0.08	0.03	0.07	0.13	0.06	0.05	0.06	0.1	0.04	0.03	0.09	0.05	0.05	0.06	0.05	0.05	0.09	0.13	0.09	0.04	0.18	0.12	0.1	0.16	0.09	0.15	0.01	0.08	0.14	0.06	0.05	0.1	0.17	0.07
	-0.32	0.01	0.01	0.07	0	0.01	0.05	0.02	0.02	0.08	0.05	0.1	0.08	0.07	0.05	0.07	0.07	0.1	0.13	0.04	0.01	0.06	0.09	0.07	0.04	0.12	0.04	0.04	0.08	0.12	0.03	0.11	0.06	0.13	0.07	0.19	0.12	0.06	0.2	0.09	0.08	0	0.1	0.17	0.07	0.04	0.11	0.12	0.08
	-0.31	0.01	0	0.05	0	0.03	0.04	0.05	0.02	0.07	0.05	0.06	0.03	0.09	0.05	0.1	0.07	0.12	0.07	0.01	0	0.08	0.06	0.07	0.09	0.11	0.04	0.04	0.11	0.07	0.04	0.12	0.15	0.09	0.04	0.13	0.08	0.05	0.11	0.12	0.07	0.03	0.13	0.1	0.05	0.06	0.1	0.14	0.11
	-0.3	0	0.02	0.04	0.01	0.03	0.04	0.01	0.03	0.07	0.04	0.03	0.08	0.07	0.1	0.12	0.04	0.1	0.16	0.08	0.02	0.04	0.05	0.09	0.08	0.06	0.03	0.06	0.08	0.05	0.05	0.04	0.07	0.06	0.06	0.2	0.09	0.08	0.14	0.11	0.1	0	0.06	0.18	0.06	0.01	0.04	0.13	0.09
	-0.29	0	0	0.04	0.03	0	0.03	0.02	0	0.07	0.08	0.08	0.06	0.12	0.06	0.11	0.05	0.11	0.09	0.06	0.03	0.06	0.05	0.05	0.08	0.09	0.03	0.02	0.09	0.04	0.05	0.13	0.11	0.13	0.06	0.22	0.09	0.08	0.1	0.1	0.12	0	0.15	0.09	0.08	0.05	0.12	0.17	0.12
	-0.28	0.01	0	0.03	0.01	0.02	0.05	0.02	0.01	0.1	0.04	0.06	0.05	0.05	0.02	0.15	0.08	0.1	0.15	0.08	0.03	0.06	0.06	0.04	0.08	0.13	0.03	0	0.11	0.03	0.05	0.11	0.07	0.08	0.12	0.15	0.09	0.03	0.18	0.08	0.1	0	0.08	0.15	0.06	0.05	0.08	0.15	0.12
	-0.27	0	0	0.08	0	0.04	0.02	0.03	0	0.09	0.01	0.03	0.13	0.03	0.07	0.12	0.08	0.09	0.09	0.11	0.04	0.08	0.08	0.12	0.11	0.09	0.04	0.06	0.1	0.1	0.08	0.13	0.08	0.08	0.05	0.19	0.06	0.1	0.2	0.11	0.08	0.01	0.12	0.07	0.11	0.04	0.09	0.13	0.11
	-0.26	0	0	0.04	0.02	0.05	0.02	0.04	0	0.07	0.02	0.1	0.04	0.11	0.04	0.1	0.05	0.1	0.08	0.08	0.02	0.08	0.13	0.09	0.09	0.08	0.09	0.03	0.11	0.06	0.02	0.14	0.11	0.07	0.08	0.15	0.11	0.07	0.18	0.12	0.11	0.01	0.07	0.14	0.07	0.05	0.13	0.18	0.12
	-0.25	0.01	0.01	0.05	0.02	0.02	0.01	0.03	0.03	0.08	0.04	0.1	0.06	0.06	0.08	0.12	0.06	0.14	0.09	0.04	0.02	0.06	0.05	0.07	0.04	0.11	0.06	0.05	0.05	0.04	0.04	0.09	0.11	0.09	0.06	0.24	0.07	0.13	0.2	0.1	0.1	0	0.12	0.11	0.07	0.06	0.11	0.17	0.1
	-0.24	0.04	0.01	0.02	0.03	0.04	0.05	0.07	0	0.04	0.06	0.04	0.06	0.07	0.08	0.09	0.09	0.07	0.08	0.02	0.04	0.05	0.09	0.12	0.08	0.06	0.06	0.04	0.15	0.05	0.02	0.06	0.08	0.07	0.07	0.16	0.08	0.04	0.15	0.09	0.09	0	0.09	0.15	0.05	0.04	0.05	0.15	0.1
	-0.23	0	0.02	0.01	0.01	0.03	0.06	0.06	0.03	0.07	0.08	0.03	0.08	0.07	0.04	0.05	0.06	0.13	0.14	0.06	0.02	0.08	0.08	0.09	0.12	0.14	0.05	0.05	0.08	0.08	0.07	0.13	0.1	0.15	0.03	0.18	0.1	0.09	0.12	0.08	0.12	0	0.14	0.14	0.11	0.05	0.11	0.21	0.15
	-0.22	0	0.01	0.03	0.03	0.05	0.02	0.05	0.01	0.03	0.05	0.02	0.03	0.08	0.05	0.09	0.06	0.05	0.12	0.1	0	0.08	0.09	0.07	0.01	0.1	0.03	0.07	0.08	0.04	0.03	0.09	0.08	0.09	0.09	0.13	0.12	0.07	0.16	0.09	0.09	0.02	0.08	0.2	0.11	0.06	0.08	0.18	0.13
	-0.21	0	0	0.05	0.02	0.02	0.03	0.04	0	0.07	0.04	0.02	0.07	0.14	0.05	0.06	0.08	0.08	0.05	0.04	0.05	0.1	0.09	0.03	0.08	0.1	0.08	0.03	0.02	0.06	0.05	0.14	0.12	0.08	0.1	0.17	0.06	0.09	0.14	0.13	0.07	0.01	0.16	0.13	0.04	0.06	0.06	0.23	0.11
	-0.2	0	0.01	0.04	0.01	0.06	0.04	0.04	0.01	0.08	0.08	0.04	0.06	0.09	0.07	0.11	0.06	0.15	0.13	0.08	0.03	0.09	0.07	0.04	0.05	0.15	0.05	0.02	0.06	0.06	0.04	0.13	0.12	0.09	0.03	0.17	0.13	0.05	0.17	0.13	0.15	0	0.1	0.12	0.04	0.05	0.07	0.21	0.13
	-0.19	0	0.03	0.04	0.02	0.02	0.01	0.05	0.02	0.03	0.07	0.03	0.1	0.12	0.04	0.08	0.09	0.13	0.08	0.12	0.02	0.09	0.08	0.06	0.1	0.05	0.04	0.01	0.07	0.1	0.03	0.07	0.07	0.11	0.07	0.08	0.07	0.15	0.16	0.09	0.1	0.02	0.14	0.16	0.07	0.11	0.05	0.18	0.08
	-0.18	0	0	0.03	0.01	0	0.05	0.11	0	0.08	0.05	0.03	0.07	0.09	0.06	0.1	0.11	0.16	0.11	0.09	0.06	0.07	0.06	0.07	0.09	0.14	0.06	0.05	0.07	0.01	0.06	0.11	0.11	0.13	0.04	0.21	0.1	0.03	0.14	0.14	0.1	0.02	0.08	0.15	0.1	0	0.06	0.25	0.15
	-0.17	0	0	0.06	0.04	0.02	0.03	0.09	0	0.03	0.07	0.11	0.06	0.07	0.03	0.04	0.01	0.12	0.1	0.03	0.03	0.08	0.07	0.07	0.1	0.07	0.05	0.03	0.08	0.07	0.02	0.07	0.13	0.11	0.07	0.18	0.1	0.08	0.12	0.11	0.08	0.02	0.15	0.08	0.06	0.07	0.07	0.19	0.16
	-0.16	0.01	0	0.04	0.01	0	0.05	0.02	0	0.08	0.05	0.04	0.05	0.07	0.07	0.04	0.05	0.13	0.16	0.06	0.03	0.04	0.1	0.04	0.14	0.09	0.02	0.03	0.05	0.07	0.03	0.1	0.12	0.13	0.06	0.22	0.05	0.1	0.12	0.17	0.12	0.01	0.2	0.14	0.07	0.03	0.11	0.19	0.13
	-0.15	0	0.01	0.08	0.01	0.04	0	0.05	0	0.05	0.08	0.05	0.06	0.07	0.05	0.07	0.07	0.07	0.1	0.05	0.02	0.1	0.12	0.04	0.06	0.08	0.05	0.01	0.12	0.02	0.02	0.11	0.04	0.06	0.08	0.1	0.11	0.07	0.13	0.14	0.08	0.01	0.13	0.15	0.02	0.05	0.12	0.2	0.1
	-0.14	0.01	0	0.04	0.02	0.04	0.05	0.04	0	0.04	0.05	0.01	0.1	0.09	0.04	0.09	0.04	0.15	0.09	0.05	0.02	0.09	0.09	0.09	0.07	0.09	0.06	0.01	0.09	0.16	0.02	0.11	0.1	0.04	0.01	0.14	0.08	0.1	0.13	0.08	0.09	0.02	0.16	0.17	0.09	0.03	0.13	0.16	0.11
	-0.13	0.01	0.01	0.04	0.05	0.01	0.05	0.02	0	0.07	0.03	0.04	0.06	0.1	0.06	0.06	0.04	0.07	0.05	0.01	0.02	0.04	0.04	0.07	0.11	0.06	0.04	0.05	0.05	0.05	0.04	0.07	0.09	0.09	0.09	0.13	0.07	0.07	0.08	0.07	0.05	0.03	0.21	0.18	0.02	0.1	0.1	0.16	0.11
	-0.12	0.01	0	0.01	0.02	0.04	0.04	0.07	0	0.08	0.07	0.09	0.06	0.1	0.05	0.06	0.07	0.14	0.11	0.06	0.01	0.05	0.09	0.08	0.08	0.13	0.05	0.05	0.07	0.09	0.01	0.1	0.06	0.05	0.1	0.16	0.09	0.11	0.22	0.07	0.09	0.02	0.14	0.16	0.05	0.06	0.12	0.15	0.09
	-0.11	0	0.02	0.08	0.02	0.05	0.03	0.02	0.01	0.09	0.07	0.04	0.07	0.06	0.1	0.16	0	0.09	0.11	0.04	0.03	0.11	0.03	0.01	0.08	0.1	0.07	0.04	0.06	0.05	0.01	0.08	0.07	0.08	0.05	0.18	0.11	0.08	0.16	0.06	0.1	0.01	0.14	0.14	0.11	0.07	0.12	0.21	0.15
	-0.1	0.01	0.02	0.08	0.01	0.02	0.04	0.04	0	0.03	0.05	0.06	0.02	0.1	0.06	0.06	0.07	0.09	0.12	0.1	0.01	0.06	0.11	0.06	0.12	0.07	0.04	0.06	0.06	0.06	0.06	0.1	0.09	0.08	0.07	0.16	0.12	0.05	0.14	0.09	0.07	0.01	0.13	0.17	0.04	0.01	0.09	0.13	0.07
	-0.09	0	0	0.03	0.02	0.03	0.03	0.05	0.02	0.06	0.06	0.04	0.06	0.08	0.04	0.07	0.06	0.09	0.12	0.03	0.06	0.04	0.08	0.06	0.06	0.11	0.1	0.02	0.05	0.09	0.04	0.1	0.1	0.09	0.06	0.13	0.14	0.04	0.22	0.09	0.12	0.01	0.18	0.11	0.07	0.04	0.11	0.13	0.13
	-0.08	0.01	0.01	0.02	0.01	0.04	0.03	0.05	0	0.03	0.03	0.03	0.07	0.12	0.09	0.07	0.04	0.12	0.12	0.05	0.01	0.06	0.05	0.05	0.13	0.07	0.03	0.08	0.06	0.05	0.06	0.08	0.09	0.12	0.04	0.18	0.13	0.08	0.15	0.09	0.08	0.01	0.13	0.1	0.03	0.05	0.1	0.15	0.05
	-0.07	0	0	0.05	0.04	0.03	0.01	0.09	0.01	0.07	0.04	0.11	0.04	0.07	0.07	0.12	0.04	0.11	0.08	0.08	0	0.05	0.12	0.07	0.14	0.15	0.04	0.03	0.12	0.08	0.05	0.12	0.09	0.14	0.05	0.13	0.11	0.06	0.1	0.08	0.15	0	0.13	0.12	0.05	0.04	0.05	0.2	0.12
	-0.06	0.01	0	0.03	0.01	0.04	0.03	0.02	0.02	0.06	0.07	0.05	0.06	0.08	0.08	0.06	0.03	0.13	0.14	0.06	0.02	0.05	0.12	0.07	0.07	0.07	0.05	0.05	0.06	0.04	0.01	0.07	0.09	0.06	0.05	0.12	0.1	0.11	0.16	0.08	0.12	0.01	0.15	0.1	0.02	0.06	0.09	0.08	0.12
	-0.05	0.03	0.01	0.06	0.02	0.03	0.03	0.08	0	0.13	0.06	0.08	0.06	0.04	0.04	0.06	0.07	0.1	0.11	0.04	0.01	0.05	0.03	0.08	0.13	0.1	0.06	0.04	0.07	0.09	0.07	0.17	0.09	0.07	0.05	0.18	0.09	0.09	0.12	0.11	0.13	0	0.07	0.16	0.02	0.05	0.09	0.18	0.13
	-0.04	0	0.01	0.07	0.02	0.02	0.02	0.04	0.02	0.07	0.04	0.08	0.04	0.12	0.04	0.15	0.03	0.16	0.11	0.07	0.03	0.07	0.12	0.09	0.06	0.1	0.12	0.09	0.11	0.06	0.05	0.1	0.05	0.08	0.04	0.12	0.08	0.04	0.13	0.09	0.14	0.01	0.11	0.2	0.07	0.07	0.11	0.14	0.11
	-0.03	0	0.01	0.05	0.03	0	0.03	0.07	0	0.13	0.04	0.06	0.07	0.12	0.05	0.04	0.03	0.12	0.08	0.05	0.02	0.08	0.04	0.05	0.12	0.07	0.02	0.02	0.1	0.11	0.07	0.11	0.04	0.14	0.09	0.16	0.11	0.07	0.12	0.1	0.09	0	0.08	0.15	0.06	0.05	0.11	0.11	0.09
	-0.02	0	0.02	0	0.01	0.02	0.03	0.07	0.01	0.03	0.07	0.06	0.05	0.07	0.05	0.09	0.03	0.04	0.17	0.05	0.02	0.12	0.1	0.06	0.14	0.08	0.05	0.06	0.06	0.03	0.03	0.13	0.09	0.07	0.07	0.13	0.07	0.08	0.15	0.04	0.19	0	0.17	0.12	0.05	0.04	0.08	0.13	0.09
	-0.01	0.01	0	0.05	0.03	0	0.03	0.09	0.02	0.07	0.07	0.1	0.08	0.14	0.06	0.05	0.06	0.1	0.11	0.04	0.01	0.05	0.07	0.04	0.04	0.06	0.03	0.02	0.12	0.04	0.06	0.15	0.1	0.11	0.03	0.15	0.05	0.08	0.14	0.08	0.07	0.01	0.08	0.18	0.09	0.02	0.11	0.13	0.09
	0	0	0.02	0.06	0.04	0.01	0.05	0.03	0	0.12	0.06	0.07	0.13	0.11	0.03	0.09	0.07	0.1	0.12	0.04	0.05	0.06	0.09	0.08	0.08	0.08	0.05	0.08	0.1	0.05	0.03	0.08	0.1	0.09	0.08	0.14	0.13	0.08	0.18	0.08	0.15	0.01	0.19	0.17	0.11	0.06	0.08	0.15	0.09
	0.01	0.03	0.07	0.46	0.03	0.05	0.12	0.18	0.02	0.2	0.33	0.35	0.31	0.19	0.26	0.35	0.16	0.42	0.31	0.08	0.06	0.24	0.11	0.12	0.36	0.33	0.01	0.03	0.31	0.14	0.03	0.19	0.25	0.08	0.09	0.49	0.13	0.18	0.26	0.13	0.14	0.03	0.18	0.56	0.07	0.04	0.17	0.15	0.09
	0.02	0.13	0.34	0.87	0.02	0.27	0.28	0.47	0.03	0.67	0.54	0.67	0.47	0.26	0.4	0.5	0.38	0.53	0.44	0.11	0.11	0.35	0.1	0.14	0.28	0.48	0	0.12	0.28	0.17	0.01	0.21	0.26	0.08	0.15	0.33	0.24	0.12	0.36	0.14	0.18	0.04	0.1	0.32	0.09	0.1	0.27	0.11	0.09
	0.03	0.36	0.69	1.34	0.07	0.42	0.38	0.38	0.04	0.91	0.52	0.71	0.31	0.18	0.31	0.61	0.53	0.74	0.54	0.1	0.14	0.38	0.12	0.18	0.26	0.58	0.04	0.11	0.37	0.29	0.02	0.29	0.35	0.09	0.15	0.35	0.3	0.15	0.34	0.21	0.17	0.03	0	0.32	0.07	0.11	0.34	0.1	0.08
	0.04	0.5	0.76	1.82	0.13	0.48	0.59	0.56	0.08	1.21	0.67	0.74	0.43	0.35	0.4	0.65	0.6	0.74	0.52	0.14	0.15	0.44	0.1	0.12	0.24	0.43	0.03	0.08	0.22	0.26	0.01	0.22	0.58	0.1	0.06	0.27	0.37	0.31	0.45	0.23	0.23	0.11	0.07	0.27	0.15	0.08	0.41	0.05	0.15
	0.05	0.64	0.81	1.9	0.08	0.62	0.72	0.48	0.06	1.1	0.59	0.85	0.49	0.53	0.54	0.57	0.72	0.69	0.66	0.2	0.11	0.52	0.02	0.16	0.39	0.5	0.07	0.14	0.24	0.31	0.03	0.24	0.64	0.13	0.1	0.5	0.35	0.39	0.38	0.18	0.16	0.12	0.07	0.24	0.13	0.11	0.42	0.04	0.12
	0.06	0.42	0.68	1.38	0.12	0.55	0.77	0.56	0.14	0.96	0.64	0.77	0.52	0.82	0.48	0.58	0.75	0.74	0.7	0.22	0.12	0.54	0.08	0.12	0.31	0.31	0.04	0.07	0.12	0.17	0.04	0.22	0.68	0.12	0.14	0.33	0.46	0.25	0.44	0.2	0.19	0.12	0.05	0.24	0.16	0.1	0.43	0.09	0.07
	0.07	0.52	0.64	1.08	0.14	0.76	0.87	0.49	0.18	0.83	0.55	0.71	0.42	0.96	0.43	0.66	0.7	0.52	0.65	0.31	0.09	0.45	0.2	0.26	0.45	0.36	0.1	0.05	0.1	0.18	0.01	0.29	0.52	0.13	0.09	0.36	0.48	0.23	0.38	0.27	0.28	0.03	0.06	0.2	0.16	0.1	0.55	0.09	0.16
	0.08	0.35	0.53	0.91	0.15	0.77	0.6	0.43	0.14	0.71	0.59	0.77	0.37	1	0.49	0.56	0.91	0.63	0.67	0.25	0.11	0.41	0.18	0.22	0.41	0.36	0.18	0.07	0.12	0.2	0	0.26	0.42	0.18	0.07	0.33	0.52	0.22	0.41	0.23	0.27	0.02	0.11	0.2	0.15	0.07	0.35	0.06	0.15
	0.09	0.27	0.27	0.91	0.19	0.65	0.57	0.35	0.16	0.5	0.5	0.71	0.36	1.04	0.27	0.53	0.81	0.67	0.75	0.29	0.09	0.37	0.18	0.23	0.46	0.38	0.15	0.14	0.09	0.15	0.02	0.29	0.38	0.15	0.06	0.38	0.44	0.19	0.39	0.21	0.21	0.02	0.2	0.27	0.21	0.05	0.32	0.08	0.09
	0.1	0.23	0.39	0.81	0.23	0.58	0.46	0.37	0.24	0.51	0.52	0.72	0.28	0.99	0.4	0.55	0.87	0.58	0.53	0.27	0.07	0.43	0.31	0.27	0.5	0.4	0.26	0.13	0.18	0.2	0.02	0.28	0.43	0.16	0.09	0.32	0.36	0.13	0.45	0.19	0.24	0.03	0.2	0.19	0.17	0.11	0.24	0.14	0.09
	0.11	0.11	0.2	0.72	0.13	0.46	0.43	0.3	0.13	0.47	0.45	0.79	0.3	0.95	0.27	0.5	0.98	0.71	0.68	0.25	0.05	0.34	0.28	0.25	0.51	0.33	0.32	0.06	0.11	0.2	0.02	0.36	0.4	0.1	0.09	0.32	0.46	0.24	0.47	0.26	0.25	0.04	0.23	0.36	0.15	0.1	0.27	0.16	0.13
	0.12	0.1	0.22	0.85	0.16	0.5	0.44	0.23	0.16	0.45	0.49	0.71	0.26	0.92	0.16	0.51	0.82	0.74	0.59	0.25	0.07	0.27	0.28	0.24	0.48	0.42	0.28	0.07	0.19	0.28	0.05	0.25	0.44	0.15	0.06	0.46	0.38	0.15	0.4	0.19	0.26	0.02	0.22	0.22	0.13	0.05	0.23	0.2	0.13
	0.13	0.13	0.25	0.92	0.19	0.38	0.37	0.32	0.16	0.48	0.46	0.63	0.32	0.76	0.16	0.48	0.96	0.62	0.59	0.21	0.05	0.32	0.27	0.28	0.47	0.42	0.27	0.15	0.22	0.24	0.05	0.4	0.39	0.26	0.09	0.4	0.43	0.25	0.38	0.2	0.2	0.02	0.13	0.28	0.22	0.12	0.37	0.28	0.12
	0.14	0.11	0.15	0.86	0.14	0.42	0.5	0.4	0.16	0.45	0.39	0.81	0.28	0.83	0.28	0.52	0.67	0.56	0.61	0.3	0.1	0.33	0.4	0.38	0.52	0.4	0.36	0.15	0.23	0.34	0.07	0.32	0.34	0.17	0.12	0.43	0.32	0.21	0.31	0.21	0.27	0.04	0.13	0.35	0.18	0.09	0.36	0.34	0.15
	0.15	0.13	0.29	0.91	0.2	0.37	0.49	0.35	0.17	0.59	0.44	0.71	0.33	0.65	0.19	0.51	0.7	0.65	0.66	0.29	0.12	0.3	0.32	0.25	0.51	0.31	0.24	0.09	0.18	0.27	0.03	0.34	0.3	0.27	0.07	0.47	0.32	0.26	0.4	0.22	0.23	0.01	0.18	0.29	0.19	0.06	0.33	0.27	0.17
	0.16	0.24	0.23	0.84	0.2	0.28	0.57	0.47	0.14	0.49	0.4	0.75	0.3	0.63	0.28	0.59	0.63	0.56	0.66	0.16	0.14	0.29	0.27	0.27	0.5	0.5	0.24	0.07	0.17	0.43	0.03	0.37	0.41	0.26	0.22	0.47	0.39	0.2	0.33	0.26	0.3	0.01	0.1	0.43	0.21	0.07	0.29	0.29	0.2
	0.17	0.28	0.37	0.86	0.23	0.33	0.42	0.5	0.14	0.41	0.38	0.72	0.28	0.58	0.25	0.59	0.61	0.46	0.66	0.28	0.15	0.21	0.43	0.35	0.4	0.38	0.24	0.16	0.3	0.32	0.1	0.4	0.35	0.27	0.21	0.53	0.29	0.26	0.35	0.27	0.29	0.02	0.15	0.25	0.15	0.06	0.31	0.38	0.16
	0.18	0.18	0.24	0.77	0.21	0.28	0.46	0.44	0.09	0.39	0.31	0.77	0.33	0.56	0.33	0.57	0.54	0.57	0.61	0.27	0.18	0.32	0.29	0.3	0.44	0.33	0.16	0.17	0.22	0.32	0.06	0.36	0.34	0.33	0.2	0.49	0.34	0.19	0.31	0.31	0.22	0.01	0.18	0.25	0.2	0.06	0.35	0.28	0.26
	0.19	0.27	0.25	0.77	0.22	0.31	0.45	0.43	0.13	0.49	0.35	0.66	0.33	0.48	0.39	0.61	0.41	0.47	0.69	0.33	0.1	0.3	0.31	0.37	0.36	0.36	0.18	0.11	0.27	0.36	0.1	0.39	0.26	0.42	0.19	0.56	0.35	0.24	0.3	0.19	0.16	0.01	0.16	0.24	0.11	0.06	0.34	0.34	0.14
	0.2	0.35	0.32	0.84	0.31	0.26	0.54	0.48	0.15	0.4	0.52	0.7	0.39	0.55	0.32	0.56	0.47	0.52	0.61	0.31	0.09	0.32	0.35	0.3	0.46	0.31	0.29	0.18	0.21	0.37	0.08	0.38	0.34	0.31	0.23	0.5	0.34	0.11	0.45	0.26	0.25	0.03	0.18	0.24	0.18	0.11	0.24	0.29	0.15
	0.21	0.34	0.25	0.84	0.29	0.33	0.52	0.5	0.11	0.5	0.33	0.57	0.35	0.64	0.33	0.57	0.4	0.54	0.64	0.23	0.14	0.34	0.28	0.34	0.37	0.39	0.21	0.1	0.29	0.31	0.11	0.42	0.29	0.34	0.14	0.6	0.3	0.27	0.38	0.32	0.14	0.04	0.2	0.25	0.15	0.1	0.18	0.3	0.27
	0.22	0.35	0.28	0.76	0.29	0.22	0.65	0.5	0.1	0.49	0.39	0.57	0.38	0.59	0.48	0.61	0.51	0.54	0.51	0.28	0.14	0.45	0.29	0.25	0.46	0.35	0.23	0.13	0.26	0.32	0.12	0.26	0.24	0.3	0.2	0.52	0.27	0.29	0.42	0.3	0.2	0.03	0.17	0.18	0.14	0.13	0.29	0.31	0.2
	0.23	0.33	0.21	0.68	0.26	0.33	0.55	0.46	0.11	0.51	0.34	0.58	0.5	0.45	0.37	0.53	0.43	0.59	0.61	0.18	0.14	0.39	0.3	0.41	0.45	0.43	0.17	0.16	0.22	0.27	0.1	0.37	0.37	0.41	0.15	0.5	0.37	0.14	0.47	0.2	0.14	0.02	0.23	0.27	0.17	0.08	0.23	0.38	0.23
	0.24	0.29	0.28	0.68	0.29	0.31	0.54	0.56	0.16	0.48	0.33	0.6	0.42	0.59	0.36	0.52	0.35	0.58	0.59	0.29	0.1	0.3	0.38	0.36	0.32	0.31	0.19	0.14	0.24	0.33	0.17	0.38	0.26	0.35	0.26	0.55	0.36	0.2	0.44	0.32	0.25	0.03	0.18	0.24	0.17	0.13	0.23	0.28	0.18
	0.25	0.31	0.18	0.74	0.39	0.28	0.6	0.43	0.03	0.5	0.39	0.45	0.44	0.52	0.35	0.56	0.33	0.47	0.59	0.29	0.15	0.38	0.33	0.31	0.39	0.33	0.28	0.14	0.31	0.32	0.12	0.4	0.26	0.4	0.19	0.49	0.4	0.16	0.42	0.14	0.13	0.04	0.24	0.24	0.1	0.05	0.24	0.39	0.24
	0.26	0.35	0.21	0.67	0.21	0.32	0.51	0.47	0.15	0.53	0.39	0.49	0.41	0.49	0.38	0.54	0.3	0.65	0.68	0.26	0.12	0.33	0.35	0.26	0.37	0.43	0.17	0.13	0.28	0.34	0.12	0.35	0.33	0.39	0.24	0.53	0.39	0.1	0.36	0.28	0.25	0.01	0.18	0.28	0.16	0.07	0.21	0.34	0.26
	0.27	0.29	0.18	0.76	0.31	0.37	0.56	0.44	0.16	0.51	0.35	0.45	0.44	0.5	0.4	0.48	0.33	0.66	0.53	0.3	0.12	0.35	0.25	0.37	0.42	0.27	0.27	0.17	0.2	0.27	0.08	0.45	0.28	0.34	0.24	0.47	0.41	0.16	0.42	0.25	0.12	0.02	0.3	0.28	0.15	0.09	0.23	0.4	0.23
	0.28	0.35	0.13	0.81	0.39	0.27	0.55	0.54	0.11	0.59	0.39	0.45	0.46	0.5	0.5	0.51	0.32	0.69	0.6	0.28	0.12	0.29	0.3	0.38	0.4	0.48	0.23	0.1	0.29	0.27	0.14	0.26	0.28	0.24	0.28	0.58	0.25	0.19	0.39	0.21	0.18	0.02	0.25	0.32	0.11	0.04	0.19	0.42	0.3
	0.29	0.37	0.12	0.7	0.29	0.29	0.49	0.48	0.17	0.45	0.34	0.33	0.41	0.44	0.35	0.5	0.18	0.63	0.51	0.33	0.19	0.41	0.39	0.44	0.36	0.28	0.32	0.09	0.27	0.35	0.12	0.4	0.33	0.33	0.19	0.51	0.31	0.18	0.34	0.23	0.15	0.02	0.21	0.18	0.19	0.08	0.25	0.38	0.23
	0.3	0.42	0.13	0.68	0.24	0.2	0.47	0.5	0.09	0.43	0.36	0.45	0.41	0.53	0.32	0.47	0.3	0.61	0.57	0.31	0.09	0.28	0.41	0.29	0.4	0.29	0.21	0.07	0.23	0.3	0.14	0.37	0.25	0.24	0.29	0.61	0.38	0.25	0.32	0.21	0.26	0.07	0.27	0.24	0.11	0.07	0.28	0.4	0.34
	0.31	0.32	0.14	0.64	0.31	0.37	0.61	0.46	0.08	0.55	0.32	0.37	0.5	0.45	0.34	0.46	0.26	0.57	0.49	0.28	0.1	0.23	0.3	0.33	0.45	0.36	0.25	0.11	0.23	0.28	0.14	0.34	0.35	0.27	0.27	0.47	0.32	0.17	0.31	0.25	0.3	0	0.25	0.21	0.16	0.05	0.18	0.38	0.3
	0.32	0.42	0.15	0.64	0.27	0.35	0.62	0.39	0.08	0.53	0.36	0.38	0.38	0.43	0.38	0.43	0.26	0.64	0.58	0.33	0.15	0.22	0.37	0.27	0.33	0.26	0.23	0.09	0.25	0.29	0.12	0.33	0.25	0.27	0.21	0.5	0.31	0.21	0.42	0.14	0.22	0.02	0.21	0.25	0.11	0.08	0.25	0.37	0.18
	0.33	0.3	0.13	0.64	0.26	0.28	0.5	0.5	0.16	0.53	0.4	0.37	0.39	0.57	0.34	0.41	0.24	0.67	0.55	0.29	0.22	0.36	0.29	0.31	0.37	0.27	0.18	0.15	0.22	0.28	0.13	0.38	0.26	0.3	0.31	0.44	0.31	0.15	0.44	0.26	0.27	0.02	0.25	0.23	0.21	0.1	0.25	0.47	0.31
	0.34	0.39	0.16	0.69	0.26	0.35	0.51	0.36	0.1	0.67	0.38	0.36	0.43	0.55	0.39	0.55	0.3	0.63	0.46	0.25	0.08	0.22	0.28	0.37	0.41	0.32	0.24	0.11	0.16	0.32	0.11	0.34	0.25	0.27	0.21	0.54	0.26	0.22	0.47	0.22	0.28	0.04	0.27	0.27	0.14	0.12	0.2	0.49	0.22
	0.35	0.37	0.14	0.69	0.24	0.3	0.53	0.49	0.09	0.44	0.35	0.33	0.45	0.4	0.43	0.38	0.19	0.68	0.52	0.31	0.17	0.3	0.29	0.3	0.39	0.32	0.22	0.12	0.3	0.28	0.17	0.32	0.24	0.27	0.28	0.43	0.27	0.17	0.4	0.18	0.29	0.01	0.28	0.28	0.12	0.07	0.16	0.41	0.21
	0.36	0.3	0.16	0.74	0.28	0.26	0.42	0.48	0.22	0.61	0.38	0.33	0.49	0.43	0.41	0.4	0.27	0.67	0.53	0.33	0.14	0.21	0.41	0.35	0.33	0.33	0.3	0.13	0.13	0.17	0.13	0.34	0.27	0.21	0.28	0.49	0.24	0.17	0.49	0.26	0.26	0.02	0.22	0.2	0.17	0.14	0.15	0.45	0.18
	0.37	0.3	0.18	0.63	0.32	0.34	0.56	0.46	0.1	0.56	0.38	0.26	0.48	0.56	0.34	0.51	0.22	0.75	0.51	0.32	0.13	0.36	0.27	0.27	0.36	0.34	0.28	0.05	0.25	0.25	0.15	0.46	0.26	0.29	0.21	0.48	0.19	0.15	0.31	0.18	0.24	0.03	0.25	0.25	0.14	0.14	0.16	0.4	0.33
	0.38	0.39	0.12	0.66	0.3	0.29	0.56	0.48	0.08	0.52	0.35	0.32	0.39	0.45	0.4	0.39	0.24	0.79	0.49	0.36	0.15	0.32	0.33	0.41	0.28	0.28	0.27	0.14	0.24	0.31	0.17	0.39	0.3	0.3	0.24	0.48	0.3	0.23	0.51	0.17	0.21	0.01	0.23	0.29	0.13	0.11	0.2	0.37	0.23
	0.39	0.29	0.1	0.72	0.3	0.34	0.54	0.56	0.13	0.57	0.29	0.3	0.51	0.52	0.37	0.46	0.2	0.87	0.5	0.32	0.11	0.27	0.29	0.32	0.28	0.29	0.12	0.19	0.25	0.26	0.18	0.33	0.31	0.31	0.28	0.39	0.26	0.16	0.29	0.15	0.27	0.02	0.27	0.22	0.1	0.09	0.17	0.38	0.27
	0.4	0.27	0.16	0.76	0.34	0.36	0.56	0.47	0.11	0.55	0.37	0.3	0.47	0.49	0.4	0.42	0.18	0.8	0.55	0.26	0.12	0.26	0.27	0.35	0.35	0.39	0.14	0.13	0.22	0.21	0.14	0.35	0.2	0.29	0.25	0.58	0.22	0.15	0.31	0.25	0.22	0.05	0.24	0.24	0.22	0.08	0.12	0.36	0.25
	0.41	0.3	0.13	0.59	0.25	0.34	0.51	0.47	0.06	0.59	0.4	0.21	0.51	0.51	0.37	0.52	0.21	0.71	0.58	0.31	0.12	0.23	0.35	0.24	0.34	0.25	0.16	0.1	0.31	0.23	0.16	0.45	0.21	0.34	0.28	0.42	0.35	0.23	0.31	0.25	0.31	0.01	0.25	0.32	0.11	0.08	0.11	0.38	0.23
	0.42	0.29	0.11	0.67	0.37	0.26	0.58	0.5	0.06	0.61	0.29	0.28	0.47	0.46	0.34	0.54	0.29	0.68	0.52	0.33	0.17	0.26	0.34	0.27	0.33	0.29	0.16	0.14	0.22	0.18	0.17	0.29	0.18	0.29	0.21	0.47	0.29	0.09	0.29	0.2	0.18	0.05	0.24	0.23	0.13	0.12	0.09	0.35	0.23
	0.43	0.24	0.15	0.62	0.27	0.3	0.49	0.46	0.17	0.55	0.4	0.32	0.46	0.5	0.39	0.45	0.21	0.63	0.59	0.26	0.19	0.36	0.34	0.33	0.31	0.29	0.14	0.14	0.2	0.27	0.15	0.4	0.23	0.28	0.18	0.43	0.22	0.17	0.44	0.23	0.17	0.03	0.25	0.3	0.16	0.04	0.17	0.42	0.2
	0.44	0.24	0.12	0.61	0.34	0.24	0.49	0.54	0.09	0.47	0.42	0.31	0.47	0.38	0.36	0.45	0.19	0.74	0.48	0.29	0.11	0.26	0.3	0.35	0.25	0.3	0.13	0.17	0.19	0.22	0.17	0.32	0.13	0.35	0.27	0.43	0.24	0.2	0.44	0.28	0.27	0.03	0.19	0.24	0.08	0.13	0.12	0.44	0.38
	0.45	0.27	0.13	0.67	0.28	0.26	0.46	0.47	0.13	0.55	0.38	0.23	0.46	0.49	0.36	0.48	0.32	0.61	0.58	0.28	0.16	0.26	0.43	0.22	0.31	0.26	0.17	0.12	0.32	0.19	0.17	0.47	0.2	0.32	0.22	0.44	0.23	0.15	0.27	0.21	0.21	0	0.25	0.19	0.15	0.12	0.14	0.45	0.21
	0.46	0.27	0.17	0.69	0.25	0.28	0.4	0.55	0.15	0.6	0.38	0.29	0.43	0.44	0.41	0.5	0.19	0.63	0.56	0.3	0.12	0.3	0.3	0.27	0.26	0.29	0.15	0.14	0.2	0.18	0.22	0.35	0.29	0.31	0.23	0.42	0.3	0.18	0.4	0.23	0.23	0.02	0.24	0.23	0.12	0.1	0.13	0.41	0.17
	0.47	0.19	0.15	0.73	0.27	0.31	0.46	0.52	0.11	0.43	0.33	0.26	0.43	0.52	0.38	0.47	0.19	0.56	0.54	0.35	0.04	0.38	0.32	0.33	0.25	0.3	0.2	0.14	0.26	0.26	0.21	0.35	0.25	0.35	0.21	0.43	0.25	0.13	0.45	0.23	0.25	0.01	0.21	0.28	0.11	0.12	0.17	0.48	0.21
	0.48	0.32	0.14	0.7	0.29	0.23	0.51	0.5	0.1	0.46	0.35	0.35	0.47	0.47	0.38	0.54	0.22	0.64	0.55	0.26	0.11	0.3	0.32	0.24	0.34	0.34	0.17	0.13	0.22	0.13	0.13	0.38	0.24	0.32	0.2	0.36	0.27	0.15	0.4	0.23	0.23	0.06	0.3	0.26	0.17	0.08	0.15	0.37	0.28
	0.49	0.25	0.18	0.68	0.28	0.26	0.44	0.5	0.1	0.59	0.4	0.27	0.53	0.45	0.31	0.47	0.25	0.6	0.65	0.27	0.11	0.31	0.3	0.25	0.3	0.3	0.24	0.16	0.24	0.22	0.16	0.42	0.23	0.32	0.34	0.35	0.15	0.12	0.35	0.29	0.2	0.02	0.33	0.27	0.12	0.13	0.14	0.43	0.23
	0.5	0.23	0.16	0.6	0.33	0.25	0.42	0.44	0.12	0.44	0.35	0.29	0.43	0.45	0.3	0.55	0.23	0.52	0.45	0.35	0.08	0.26	0.28	0.36	0.36	0.3	0.14	0.19	0.27	0.16	0.2	0.27	0.28	0.33	0.22	0.44	0.21	0.23	0.4	0.17	0.29	0.05	0.14	0.26	0.08	0.15	0.08	0.43	0.25
	0.51	0.26	0.21	0.55	0.38	0.25	0.54	0.48	0.07	0.53	0.41	0.34	0.37	0.5	0.41	0.55	0.28	0.6	0.62	0.31	0.14	0.35	0.35	0.33	0.37	0.31	0.18	0.16	0.25	0.19	0.19	0.33	0.25	0.27	0.23	0.49	0.14	0.13	0.23	0.23	0.18	0.03	0.15	0.27	0.1	0.1	0.2	0.32	0.25
	0.52	0.23	0.11	0.64	0.37	0.26	0.39	0.5	0.1	0.44	0.35	0.27	0.45	0.36	0.36	0.47	0.19	0.5	0.55	0.35	0.06	0.33	0.3	0.25	0.32	0.31	0.14	0.23	0.21	0.17	0.15	0.31	0.29	0.36	0.18	0.33	0.17	0.21	0.35	0.16	0.15	0	0.31	0.28	0.08	0.09	0.09	0.46	0.29
	0.53	0.23	0.11	0.5	0.16	0.42	0.43	0.44	0.12	0.44	0.37	0.27	0.44	0.43	0.42	0.53	0.27	0.52	0.54	0.27	0.12	0.19	0.38	0.18	0.32	0.3	0.15	0.11	0.25	0.15	0.2	0.31	0.26	0.37	0.17	0.44	0.22	0.15	0.31	0.32	0.24	0.06	0.23	0.25	0.09	0.12	0.14	0.38	0.25
	0.54	0.2	0.12	0.61	0.38	0.3	0.46	0.56	0.09	0.51	0.49	0.23	0.47	0.47	0.28	0.54	0.12	0.58	0.64	0.29	0.12	0.35	0.25	0.27	0.3	0.34	0.15	0.15	0.27	0.19	0.21	0.35	0.2	0.36	0.14	0.36	0.21	0.19	0.37	0.2	0.21	0.02	0.23	0.29	0.12	0.09	0.14	0.37	0.29
	0.55	0.26	0.09	0.6	0.33	0.31	0.33	0.55	0.08	0.36	0.43	0.32	0.42	0.53	0.32	0.52	0.3	0.68	0.54	0.25	0.12	0.37	0.4	0.29	0.49	0.33	0.14	0.18	0.26	0.21	0.11	0.32	0.39	0.27	0.16	0.45	0.18	0.14	0.37	0.23	0.27	0	0.29	0.24	0.11	0.09	0.08	0.42	0.28
	0.56	0.19	0.12	0.59	0.34	0.3	0.45	0.4	0.08	0.54	0.42	0.25	0.49	0.44	0.37	0.57	0.14	0.61	0.58	0.35	0.08	0.22	0.37	0.27	0.3	0.32	0.14	0.18	0.26	0.26	0.21	0.42	0.2	0.38	0.21	0.51	0.21	0.31	0.29	0.22	0.26	0.02	0.26	0.24	0.07	0.04	0.13	0.4	0.2
	0.57	0.23	0.1	0.61	0.37	0.25	0.29	0.42	0.11	0.42	0.35	0.26	0.46	0.56	0.38	0.46	0.23	0.74	0.59	0.24	0.05	0.34	0.32	0.22	0.27	0.36	0.19	0.18	0.26	0.19	0.1	0.31	0.25	0.34	0.23	0.48	0.25	0.11	0.41	0.26	0.23	0.03	0.34	0.22	0.11	0.14	0.08	0.35	0.28
	0.58	0.22	0.11	0.62	0.35	0.32	0.33	0.47	0.07	0.51	0.45	0.35	0.38	0.46	0.39	0.48	0.16	0.57	0.69	0.21	0.08	0.31	0.31	0.31	0.3	0.28	0.17	0.16	0.18	0.31	0.15	0.4	0.18	0.28	0.13	0.48	0.23	0.22	0.28	0.15	0.26	0.03	0.32	0.26	0.11	0.11	0.13	0.41	0.23
	0.59	0.22	0.15	0.61	0.28	0.42	0.44	0.53	0.06	0.32	0.39	0.26	0.45	0.46	0.34	0.41	0.15	0.54	0.55	0.32	0.11	0.25	0.31	0.27	0.35	0.33	0.17	0.12	0.25	0.09	0.14	0.36	0.26	0.28	0.15	0.37	0.29	0.22	0.29	0.25	0.26	0.03	0.33	0.24	0.1	0.11	0.11	0.34	0.26
	0.6	0.26	0.1	0.68	0.27	0.34	0.23	0.5	0.14	0.58	0.39	0.23	0.35	0.53	0.39	0.48	0.19	0.62	0.58	0.31	0.12	0.25	0.27	0.23	0.29	0.47	0.19	0.21	0.28	0.23	0.15	0.33	0.21	0.3	0.27	0.43	0.24	0.14	0.34	0.15	0.25	0.01	0.28	0.29	0.09	0.06	0.11	0.3	0.24
	0.61	0.29	0.12	0.59	0.2	0.28	0.47	0.41	0.18	0.46	0.4	0.21	0.47	0.42	0.35	0.41	0.19	0.63	0.68	0.28	0.11	0.24	0.32	0.31	0.33	0.27	0.24	0.17	0.28	0.19	0.12	0.32	0.28	0.3	0.12	0.53	0.21	0.2	0.34	0.28	0.27	0.01	0.32	0.37	0.08	0.14	0.12	0.41	0.25
	0.62	0.17	0.1	0.54	0.31	0.3	0.43	0.51	0.07	0.46	0.47	0.33	0.41	0.42	0.37	0.48	0.21	0.61	0.62	0.25	0.14	0.21	0.34	0.24	0.34	0.35	0.18	0.17	0.31	0.26	0.21	0.34	0.29	0.37	0.1	0.4	0.29	0.19	0.39	0.15	0.18	0.03	0.3	0.17	0.09	0.11	0.13	0.4	0.3
	0.63	0.25	0.13	0.65	0.3	0.31	0.31	0.45	0.09	0.38	0.38	0.25	0.38	0.44	0.3	0.59	0.17	0.65	0.67	0.24	0.21	0.18	0.37	0.34	0.31	0.33	0.21	0.24	0.24	0.13	0.06	0.41	0.24	0.31	0.2	0.39	0.24	0.22	0.33	0.26	0.33	0.01	0.37	0.31	0.06	0.07	0.14	0.46	0.31
	0.64	0.21	0.17	0.6	0.28	0.22	0.42	0.5	0.07	0.4	0.33	0.17	0.46	0.46	0.39	0.42	0.2	0.67	0.59	0.3	0.18	0.34	0.34	0.24	0.36	0.24	0.24	0.21	0.25	0.22	0.1	0.35	0.24	0.38	0.23	0.45	0.21	0.13	0.37	0.17	0.24	0	0.24	0.31	0.09	0.13	0.04	0.35	0.35
	0.65	0.29	0.17	0.62	0.28	0.29	0.44	0.42	0.12	0.5	0.41	0.29	0.43	0.46	0.37	0.55	0.17	0.54	0.53	0.33	0.17	0.32	0.34	0.28	0.28	0.38	0.15	0.25	0.24	0.21	0.18	0.34	0.24	0.42	0.16	0.38	0.32	0.19	0.34	0.21	0.21	0	0.38	0.27	0.13	0.09	0.07	0.35	0.24
	0.66	0.22	0.13	0.64	0.23	0.25	0.34	0.49	0.08	0.37	0.39	0.28	0.44	0.47	0.36	0.43	0.19	0.7	0.58	0.32	0.12	0.33	0.3	0.25	0.37	0.33	0.26	0.16	0.29	0.21	0.1	0.44	0.36	0.32	0.24	0.36	0.32	0.14	0.38	0.28	0.29	0	0.36	0.25	0.09	0.1	0.09	0.41	0.24
	0.67	0.3	0.11	0.69	0.29	0.37	0.36	0.45	0.04	0.32	0.36	0.27	0.33	0.38	0.32	0.46	0.13	0.61	0.49	0.2	0.08	0.26	0.43	0.24	0.35	0.32	0.21	0.19	0.25	0.18	0.07	0.42	0.24	0.32	0.17	0.46	0.25	0.21	0.28	0.3	0.25	0.03	0.27	0.19	0.13	0.1	0.12	0.35	0.22
	0.68	0.24	0.1	0.58	0.31	0.2	0.51	0.44	0.1	0.41	0.41	0.31	0.49	0.44	0.3	0.43	0.17	0.45	0.7	0.42	0.13	0.2	0.35	0.36	0.36	0.35	0.17	0.18	0.23	0.19	0.1	0.34	0.21	0.37	0.19	0.37	0.26	0.11	0.33	0.26	0.29	0.04	0.41	0.28	0.14	0.11	0.14	0.38	0.27
	0.69	0.26	0.11	0.69	0.26	0.33	0.41	0.48	0.04	0.46	0.36	0.25	0.43	0.45	0.32	0.49	0.17	0.66	0.57	0.27	0.16	0.26	0.36	0.22	0.29	0.32	0.18	0.22	0.21	0.25	0.14	0.43	0.35	0.42	0.1	0.46	0.18	0.19	0.43	0.3	0.24	0.02	0.25	0.29	0.17	0.14	0.16	0.39	0.33
	0.7	0.28	0.17	0.8	0.3	0.25	0.33	0.48	0.04	0.47	0.38	0.31	0.44	0.44	0.35	0.42	0.15	0.59	0.48	0.32	0.09	0.34	0.32	0.25	0.3	0.38	0.14	0.19	0.28	0.21	0.14	0.33	0.29	0.28	0.11	0.45	0.24	0.19	0.34	0.23	0.21	0.04	0.25	0.19	0.16	0.14	0.13	0.4	0.22
	0.71	0.2	0.17	0.86	0.26	0.32	0.46	0.39	0.08	0.51	0.42	0.2	0.47	0.38	0.3	0.45	0.17	0.59	0.63	0.35	0.1	0.32	0.39	0.32	0.24	0.29	0.16	0.26	0.25	0.25	0.14	0.45	0.25	0.32	0.16	0.58	0.22	0.1	0.39	0.22	0.27	0.01	0.3	0.28	0.2	0.15	0.05	0.37	0.28
	0.72	0.21	0.08	0.7	0.35	0.31	0.36	0.53	0.13	0.47	0.38	0.29	0.43	0.53	0.31	0.55	0.18	0.61	0.56	0.28	0.11	0.29	0.39	0.23	0.36	0.35	0.2	0.22	0.24	0.17	0.16	0.37	0.24	0.28	0.19	0.34	0.21	0.16	0.37	0.3	0.21	0.05	0.25	0.27	0.11	0.14	0.14	0.42	0.23
	0.73	0.24	0.16	0.78	0.27	0.3	0.36	0.48	0.11	0.42	0.41	0.28	0.52	0.46	0.37	0.44	0.19	0.64	0.55	0.26	0.11	0.28	0.31	0.28	0.43	0.47	0.2	0.23	0.32	0.12	0.12	0.37	0.19	0.37	0.14	0.37	0.18	0.22	0.47	0.23	0.26	0.02	0.33	0.26	0.16	0.09	0.16	0.36	0.22
	0.74	0.24	0.1	0.72	0.31	0.25	0.35	0.46	0.08	0.45	0.46	0.23	0.4	0.44	0.27	0.46	0.1	0.61	0.65	0.31	0.08	0.29	0.38	0.26	0.26	0.33	0.22	0.17	0.27	0.21	0.15	0.38	0.25	0.26	0.11	0.35	0.25	0.11	0.44	0.23	0.23	0.05	0.39	0.25	0.1	0.11	0.11	0.34	0.18
	0.75	0.18	0.11	0.76	0.34	0.32	0.39	0.51	0.13	0.46	0.39	0.29	0.4	0.51	0.38	0.46	0.18	0.68	0.48	0.29	0.12	0.3	0.38	0.28	0.35	0.3	0.16	0.25	0.24	0.21	0.16	0.44	0.31	0.32	0.16	0.41	0.25	0.2	0.46	0.2	0.22	0	0.35	0.26	0.11	0.12	0.12	0.3	0.2
	0.76	0.21	0.11	0.81	0.34	0.26	0.43	0.48	0.1	0.46	0.37	0.23	0.55	0.41	0.33	0.49	0.08	0.6	0.71	0.29	0.21	0.33	0.31	0.32	0.4	0.31	0.24	0.22	0.32	0.14	0.16	0.32	0.19	0.22	0.12	0.36	0.2	0.17	0.35	0.18	0.23	0.01	0.27	0.33	0.08	0.13	0.12	0.38	0.21
	0.77	0.35	0.09	0.76	0.36	0.32	0.38	0.45	0.09	0.53	0.37	0.27	0.42	0.44	0.35	0.48	0.24	0.6	0.61	0.25	0.12	0.28	0.34	0.23	0.21	0.33	0.16	0.3	0.29	0.19	0.12	0.38	0.27	0.27	0.08	0.4	0.28	0.22	0.4	0.25	0.19	0.02	0.42	0.21	0.12	0.09	0.16	0.37	0.25
	0.78	0.37	0.14	0.72	0.31	0.33	0.36	0.45	0.1	0.48	0.37	0.21	0.53	0.44	0.32	0.54	0.09	0.52	0.63	0.27	0.12	0.29	0.38	0.27	0.34	0.37	0.12	0.24	0.3	0.15	0.13	0.34	0.28	0.34	0.14	0.43	0.36	0.19	0.39	0.23	0.27	0	0.26	0.28	0.07	0.12	0.12	0.28	0.25
	0.79	0.3	0.08	0.67	0.27	0.29	0.34	0.47	0.14	0.47	0.45	0.32	0.47	0.44	0.35	0.38	0.17	0.58	0.57	0.19	0.13	0.34	0.34	0.28	0.26	0.36	0.26	0.18	0.27	0.15	0.08	0.44	0.26	0.32	0.11	0.46	0.28	0.15	0.48	0.28	0.25	0.02	0.43	0.26	0.12	0.15	0.08	0.35	0.21
	0.8	0.32	0.11	0.7	0.28	0.29	0.34	0.54	0.1	0.4	0.41	0.37	0.45	0.41	0.33	0.54	0.16	0.56	0.7	0.31	0.12	0.28	0.46	0.29	0.23	0.37	0.2	0.15	0.3	0.17	0.15	0.3	0.21	0.41	0.18	0.43	0.37	0.21	0.35	0.18	0.33	0	0.22	0.26	0.09	0.12	0.03	0.44	0.25
	0.81	0.32	0.12	0.69	0.43	0.34	0.39	0.5	0.13	0.5	0.4	0.15	0.41	0.44	0.33	0.51	0.12	0.65	0.53	0.36	0.1	0.29	0.39	0.19	0.27	0.31	0.29	0.19	0.28	0.17	0.13	0.48	0.28	0.36	0.17	0.36	0.26	0.16	0.36	0.24	0.29	0.01	0.32	0.25	0.14	0.1	0.14	0.3	0.19
	0.82	0.23	0.05	0.77	0.34	0.27	0.39	0.4	0.14	0.53	0.46	0.26	0.48	0.33	0.35	0.65	0.25	0.57	0.65	0.33	0.06	0.3	0.32	0.22	0.17	0.42	0.16	0.26	0.27	0.18	0.16	0.38	0.25	0.27	0.19	0.43	0.32	0.1	0.38	0.29	0.29	0.03	0.4	0.24	0.12	0.11	0.04	0.39	0.19
	0.83	0.23	0.07	0.71	0.33	0.35	0.36	0.54	0.13	0.41	0.43	0.32	0.39	0.49	0.4	0.52	0.11	0.57	0.61	0.31	0.14	0.37	0.39	0.33	0.25	0.4	0.22	0.19	0.3	0.21	0.18	0.31	0.15	0.43	0.17	0.38	0.29	0.18	0.44	0.32	0.35	0.02	0.38	0.32	0.14	0.05	0.06	0.32	0.26
	0.84	0.27	0.17	0.63	0.34	0.32	0.34	0.41	0.12	0.44	0.34	0.22	0.49	0.52	0.36	0.66	0.13	0.56	0.63	0.29	0.16	0.31	0.38	0.35	0.28	0.36	0.32	0.15	0.28	0.17	0.14	0.4	0.25	0.41	0.18	0.4	0.2	0.2	0.27	0.2	0.26	0.01	0.34	0.33	0.12	0.04	0.09	0.33	0.22
	0.85	0.31	0.09	0.74	0.28	0.28	0.33	0.53	0.11	0.43	0.36	0.33	0.4	0.54	0.45	0.5	0.16	0.56	0.61	0.26	0.11	0.33	0.36	0.25	0.28	0.4	0.23	0.2	0.26	0.18	0.16	0.52	0.26	0.33	0.17	0.46	0.19	0.18	0.35	0.27	0.31	0.01	0.42	0.26	0.14	0.11	0.08	0.45	0.2
	0.86	0.25	0.08	0.6	0.33	0.37	0.37	0.49	0.14	0.46	0.47	0.26	0.46	0.35	0.4	0.46	0.09	0.61	0.64	0.28	0.2	0.27	0.28	0.28	0.29	0.4	0.27	0.22	0.4	0.16	0.17	0.39	0.31	0.26	0.07	0.39	0.24	0.19	0.3	0.26	0.33	0.04	0.36	0.26	0.13	0.13	0.12	0.38	0.24
	0.87	0.2	0.1	0.68	0.32	0.3	0.29	0.51	0.03	0.44	0.35	0.28	0.46	0.42	0.28	0.5	0.12	0.45	0.58	0.3	0.1	0.27	0.3	0.31	0.22	0.39	0.19	0.19	0.3	0.21	0.18	0.38	0.2	0.37	0.11	0.41	0.23	0.2	0.4	0.23	0.22	0.01	0.33	0.3	0.11	0.07	0.1	0.4	0.22
	0.88	0.25	0.16	0.57	0.31	0.33	0.3	0.43	0.2	0.41	0.41	0.24	0.46	0.42	0.38	0.37	0.15	0.51	0.66	0.36	0.15	0.33	0.39	0.25	0.33	0.34	0.28	0.26	0.34	0.16	0.17	0.35	0.3	0.3	0.09	0.32	0.24	0.22	0.42	0.24	0.31	0.01	0.3	0.27	0.17	0.18	0.09	0.37	0.22
	0.89	0.28	0.08	0.67	0.34	0.32	0.32	0.42	0.07	0.49	0.42	0.29	0.55	0.36	0.35	0.45	0.08	0.5	0.65	0.25	0.09	0.21	0.49	0.36	0.31	0.45	0.2	0.17	0.26	0.28	0.18	0.38	0.22	0.38	0.12	0.5	0.32	0.19	0.35	0.25	0.18	0.02	0.43	0.28	0.09	0.11	0.11	0.25	0.3
	0.9	0.37	0.15	0.76	0.33	0.3	0.33	0.42	0.13	0.5	0.41	0.32	0.44	0.4	0.35	0.47	0.13	0.65	0.61	0.39	0.11	0.26	0.32	0.27	0.28	0.36	0.19	0.17	0.36	0.18	0.18	0.31	0.26	0.37	0.18	0.42	0.28	0.16	0.36	0.31	0.3	0.06	0.33	0.32	0.13	0.08	0.1	0.31	0.25
	0.91	0.32	0.09	0.73	0.24	0.37	0.33	0.46	0.05	0.44	0.3	0.3	0.58	0.46	0.33	0.5	0.12	0.53	0.58	0.31	0.06	0.21	0.4	0.32	0.23	0.38	0.27	0.19	0.31	0.21	0.12	0.48	0.31	0.19	0.13	0.47	0.27	0.16	0.35	0.2	0.22	0.04	0.42	0.22	0.13	0.15	0.1	0.45	0.24
	0.92	0.33	0.09	0.73	0.4	0.28	0.26	0.4	0.1	0.47	0.47	0.26	0.45	0.48	0.33	0.47	0.14	0.58	0.58	0.28	0.17	0.3	0.36	0.31	0.31	0.41	0.22	0.24	0.25	0.22	0.12	0.39	0.21	0.36	0.19	0.51	0.27	0.2	0.26	0.24	0.24	0.01	0.33	0.29	0.1	0.07	0.12	0.33	0.21
	0.93	0.34	0.14	0.68	0.26	0.34	0.28	0.5	0.14	0.47	0.33	0.3	0.41	0.44	0.38	0.44	0.11	0.59	0.7	0.23	0.13	0.26	0.44	0.21	0.25	0.4	0.24	0.23	0.32	0.19	0.13	0.51	0.22	0.2	0.06	0.42	0.24	0.14	0.37	0.26	0.21	0.02	0.29	0.33	0.16	0.13	0.09	0.38	0.22
	0.94	0.24	0.08	0.65	0.33	0.31	0.25	0.5	0.13	0.45	0.44	0.34	0.55	0.49	0.36	0.41	0.16	0.55	0.7	0.36	0.08	0.27	0.39	0.28	0.26	0.35	0.24	0.15	0.38	0.15	0.21	0.33	0.32	0.23	0.14	0.5	0.29	0.13	0.4	0.22	0.2	0.01	0.27	0.28	0.13	0.09	0.09	0.39	0.21
	0.95	0.29	0.15	0.72	0.41	0.28	0.28	0.46	0.14	0.42	0.33	0.32	0.48	0.5	0.36	0.4	0.12	0.46	0.66	0.28	0.11	0.32	0.44	0.34	0.3	0.49	0.25	0.13	0.35	0.24	0.16	0.5	0.3	0.31	0.15	0.41	0.3	0.12	0.39	0.39	0.2	0.03	0.31	0.23	0.12	0.17	0.09	0.39	0.23
	0.96	0.29	0.09	0.6	0.37	0.36	0.26	0.4	0.08	0.48	0.43	0.32	0.53	0.41	0.31	0.44	0.14	0.55	0.65	0.29	0.14	0.23	0.45	0.29	0.31	0.37	0.33	0.27	0.32	0.19	0.15	0.43	0.32	0.24	0.13	0.44	0.29	0.14	0.31	0.29	0.25	0.03	0.31	0.35	0.09	0.14	0.11	0.42	0.13
	0.97	0.28	0.12	0.63	0.3	0.25	0.37	0.45	0.14	0.47	0.34	0.24	0.52	0.4	0.42	0.52	0.14	0.48	0.69	0.29	0.14	0.31	0.43	0.24	0.25	0.36	0.25	0.15	0.41	0.14	0.16	0.43	0.28	0.26	0.16	0.39	0.26	0.17	0.42	0.3	0.29	0.03	0.31	0.26	0.18	0.15	0.09	0.36	0.28
	0.98	0.31	0.1	0.62	0.32	0.33	0.29	0.47	0.14	0.61	0.44	0.34	0.63	0.35	0.36	0.49	0.09	0.62	0.79	0.23	0.11	0.27	0.4	0.18	0.24	0.35	0.2	0.19	0.32	0.21	0.19	0.39	0.24	0.36	0.15	0.43	0.22	0.19	0.41	0.28	0.27	0.01	0.33	0.25	0.11	0.07	0.07	0.42	0.26
	0.99	0.33	0.08	0.66	0.3	0.36	0.24	0.44	0.07	0.39	0.3	0.28	0.44	0.46	0.33	0.45	0.13	0.6	0.58	0.25	0.08	0.33	0.41	0.36	0.22	0.4	0.24	0.19	0.36	0.2	0.18	0.47	0.35	0.2	0.11	0.45	0.22	0.15	0.35	0.22	0.25	0.02	0.27	0.28	0.12	0.14	0.09	0.36	0.18
	1	0.28	0.14	0.66	0.33	0.26	0.33	0.38	0.15	0.45	0.43	0.23	0.59	0.39	0.38	0.52	0.14	0.62	0.68	0.23	0.09	0.34	0.48	0.24	0.3	0.35	0.25	0.17	0.4	0.14	0.21	0.42	0.24	0.31	0.16	0.39	0.23	0.13	0.38	0.26	0.3	0.01	0.29	0.24	0.15	0.14	0.12	0.36	0.28
	1.01	0.21	0.05	0.59	0.3	0.26	0.35	0.37	0.12	0.35	0.34	0.26	0.43	0.34	0.32	0.53	0.1	0.59	0.26	0.2	0.08	0.27	0.36	0.25	0.22	0.49	0.3	0.17	0.29	0.25	0.24	0.44	0.29	0.32	0.08	0.11	0.25	0.18	0.34	0.25	0.23	0	0.29	0.27	0.04	0.12	0.08	0.34	0.16
	1.02	0.15	0.01	0.54	0.23	0.25	0.29	0.14	0.08	0.3	0.11	0.25	0.18	0.19	0.08	0.21	0	0.4	0	0.16	0.02	0.24	0.21	0.24	0.02	0.46	0.44	0.22	0.19	0.08	0.41	0.38	0.36	0.35	0.09	0.04	0.11	0.13	0.22	0.14	0.31	0	0.28	0.26	0.1	0.04	0.02	0.43	0.22
	1.03	0.07	0	0.42	0.22	0.07	0.12	0.03	0.12	0.22	0.04	0.18	0.19	0.17	0.02	0.08	0	0.2	0.01	0.07	0.04	0.23	0.07	0.2	0	0.38	0.5	0.22	0.08	0.11	0.4	0.41	0.24	0.25	0.05	0.02	0.04	0.25	0.24	0.12	0.25	0	0.17	0.21	0.05	0.03	0	0.41	0.22
	1.04	0.04	0.01	0.4	0.19	0.09	0.05	0.04	0.04	0.06	0.03	0.15	0.16	0.11	0.06	0.05	0	0.15	0.02	0.05	0.02	0.08	0.08	0.04	0	0.47	0.5	0.15	0.02	0.06	0.44	0.29	0.17	0.23	0.11	0.06	0.06	0.23	0.16	0.15	0.26	0	0.12	0.14	0.05	0.04	0	0.43	0.17
	1.05	0.03	0	0.26	0.11	0.03	0.04	0	0.05	0.11	0.01	0.11	0.12	0.08	0.01	0.01	0	0.18	0.01	0.01	0.01	0.14	0.04	0.04	0	0.33	0.62	0.08	0.03	0.05	0.41	0.34	0.13	0.18	0.05	0.05	0.06	0.27	0.17	0.1	0.17	0	0.09	0.15	0.04	0.06	0.01	0.46	0.12
	1.06	0.02	0	0.21	0.04	0.04	0.02	0.01	0.01	0.11	0.06	0.1	0.12	0.02	0	0.01	0	0.1	0	0	0.01	0.1	0.03	0.01	0	0.23	0.71	0.06	0.02	0.07	0.46	0.21	0.05	0.17	0.06	0.09	0.02	0.2	0.17	0.1	0.36	0	0.11	0.21	0.04	0.1	0	0.44	0.17
	1.07	0.01	0	0.16	0	0.01	0.01	0.01	0	0.08	0.03	0.11	0.04	0.02	0.01	0.01	0	0.11	0	0	0.01	0.09	0.03	0.01	0.01	0.24	0.58	0.01	0	0.08	0.32	0.26	0.05	0.25	0.07	0.09	0.03	0.22	0.18	0.14	0.22	0	0.08	0.18	0.02	0.13	0	0.23	0.19
	1.08	0	0	0.15	0.02	0	0	0	0.01	0.1	0.03	0.09	0.04	0.04	0	0	0	0.04	0	0	0	0.1	0	0	0	0.18	0.41	0	0	0.1	0.29	0.27	0.01	0.14	0	0.18	0.07	0.23	0.07	0.11	0.24	0	0.03	0.22	0.03	0.08	0	0.18	0.24
	1.09	0.03	0	0.13	0	0	0.01	0.03	0.01	0.08	0.03	0.07	0.06	0.02	0.01	0.01	0	0.08	0	0	0.03	0.12	0	0	0	0.27	0.46	0.02	0	0.16	0.16	0.14	0.01	0.22	0.04	0.24	0.01	0.14	0.21	0.09	0.3	0	0.09	0.22	0.04	0.09	0	0.24	0.16
	1.1	0.01	0	0.07	0.01	0	0.01	0.03	0	0.07	0	0.07	0.02	0.02	0.01	0.01	0	0.06	0.02	0	0.02	0.07	0	0	0	0.17	0.34	0	0	0.1	0.19	0.13	0.04	0.2	0.06	0.36	0.11	0.12	0.13	0.13	0.26	0	0.06	0.35	0.06	0.17	0	0.14	0.14
	1.11	0	0	0.05	0	0	0.01	0.05	0	0.11	0.03	0.09	0.03	0.02	0	0.02	0.01	0.06	0	0	0.01	0.12	0	0	0	0.13	0.24	0.01	0	0.14	0.11	0.22	0.06	0.21	0.04	0.35	0.05	0.14	0.13	0.04	0.26	0	0.03	0.35	0.03	0.1	0	0.13	0.28
	1.12	0	0	0.07	0	0	0.03	0.08	0	0.09	0.02	0.05	0.05	0.04	0	0.02	0	0.07	0.02	0	0.03	0.08	0	0	0	0.04	0.23	0.02	0	0.07	0.14	0.08	0.04	0.18	0.01	0.53	0.08	0.12	0.1	0.07	0.2	0	0.06	0.35	0.07	0.06	0.01	0.15	0.18
	1.13	0	0	0.08	0.02	0.01	0.02	0.12	0	0.1	0.02	0.03	0.06	0.01	0	0.02	0	0.06	0.04	0	0.04	0.09	0	0	0	0.05	0.19	0.02	0	0.16	0.13	0.15	0.07	0.23	0.03	0.58	0.08	0.05	0.08	0.06	0.27	0	0.1	0.35	0.04	0.05	0	0.16	0.18
	1.14	0	0	0.04	0	0	0.03	0.13	0	0.17	0.04	0.06	0.02	0.01	0.01	0.02	0	0.05	0.06	0	0.04	0.08	0	0	0.01	0.06	0.12	0.02	0	0.07	0.11	0.14	0.04	0.18	0.05	0.55	0.02	0.05	0.09	0.11	0.24	0	0.08	0.42	0.05	0.11	0	0.17	0.25
	1.15	0	0	0.03	0.02	0	0	0.14	0	0.14	0.03	0.13	0.07	0.07	0.01	0	0	0.02	0.01	0	0.02	0.11	0	0	0	0.01	0.1	0.02	0	0.11	0.14	0.09	0.06	0.25	0.02	0.66	0.09	0.04	0.18	0.07	0.23	0	0.09	0.36	0.07	0.07	0	0.14	0.21
	1.16	0	0	0.04	0.01	0	0.01	0.15	0	0.07	0.03	0.06	0.06	0.04	0	0.01	0	0.05	0.1	0	0.02	0.06	0	0	0.03	0.01	0.09	0.02	0	0.08	0.11	0.09	0.07	0.25	0.06	0.61	0.08	0.02	0.12	0.1	0.23	0	0.11	0.44	0.07	0.09	0	0.13	0.19
	1.17	0	0	0.03	0.01	0	0.01	0.14	0	0.13	0.01	0.02	0.05	0.07	0	0.02	0.04	0.02	0.1	0	0.05	0.09	0	0	0.03	0.01	0.14	0.01	0	0.11	0.07	0.07	0.1	0.17	0.02	0.65	0.01	0.06	0.12	0.1	0.27	0	0.07	0.39	0.04	0.07	0.01	0.16	0.15
	1.18	0	0	0.03	0.02	0	0.03	0.09	0	0.06	0.05	0.01	0.08	0.03	0	0.01	0.03	0.02	0.15	0	0.02	0.1	0	0.01	0.03	0.01	0.13	0	0	0.06	0.05	0.17	0.07	0.19	0.04	0.6	0.13	0.03	0.21	0.07	0.21	0.01	0.06	0.38	0.08	0.11	0	0.18	0.22
	1.19	0	0	0.02	0.01	0	0.01	0.17	0	0.12	0.03	0.07	0.1	0.04	0.01	0.03	0.02	0.02	0.17	0	0.02	0.12	0	0	0	0	0.07	0.04	0	0.14	0.06	0.13	0.13	0.18	0.04	0.63	0.06	0.05	0.16	0.06	0.26	0	0.09	0.32	0.02	0.06	0	0.27	0.21
	1.2	0	0	0	0	0	0.02	0.16	0	0.14	0.05	0.07	0.03	0.03	0	0.06	0.02	0.03	0.17	0	0.07	0.12	0	0	0.03	0	0.15	0.01	0	0.1	0.04	0.14	0.1	0.12	0.06	0.46	0.09	0	0.12	0.09	0.17	0	0.12	0.37	0.01	0.08	0	0.18	0.17
	1.21	0	0	0.03	0.01	0	0.02	0.11	0	0.15	0.06	0.04	0.06	0.06	0.01	0.03	0.01	0	0.15	0	0.02	0.16	0	0	0.04	0	0.08	0	0	0.06	0.07	0.09	0.1	0.16	0.07	0.56	0.1	0	0.13	0.1	0.27	0	0.13	0.37	0.09	0.04	0.01	0.15	0.23
	1.22	0.01	0	0.03	0.01	0	0.02	0.15	0	0.13	0.02	0.09	0.12	0.07	0.01	0.03	0.08	0.01	0.24	0	0.03	0.16	0	0	0.09	0.02	0.05	0.01	0	0.14	0.04	0.18	0.18	0.18	0.08	0.44	0.08	0.04	0.14	0.05	0.12	0.01	0.08	0.34	0.05	0.09	0	0.28	0.27
	1.23	0.01	0	0.06	0.01	0	0.01	0.19	0	0.1	0.04	0.05	0.03	0.05	0.03	0.04	0.05	0.02	0.16	0.01	0	0.14	0	0	0.05	0.01	0.13	0.02	0	0.13	0.04	0.14	0.11	0.13	0.06	0.45	0.1	0	0.21	0.05	0.13	0	0.1	0.24	0.11	0.1	0	0.27	0.21
	1.24	0	0	0.03	0	0	0.01	0.16	0	0.17	0.03	0.03	0.09	0.02	0	0.04	0.02	0.04	0.29	0.01	0	0.12	0	0	0.08	0	0.15	0.03	0	0.08	0.07	0.14	0.18	0.18	0.09	0.45	0.07	0.05	0.18	0.09	0.2	0.01	0.17	0.32	0.06	0.06	0	0.17	0.18
	1.25	0	0	0.03	0.01	0	0	0.16	0	0.12	0.03	0.07	0.1	0.05	0.02	0.03	0.06	0.01	0.27	0	0.04	0.13	0	0	0.1	0.03	0.08	0.03	0.01	0.08	0.06	0.16	0.21	0.08	0.09	0.38	0.07	0.02	0.15	0.08	0.18	0	0.07	0.27	0.09	0.08	0.01	0.16	0.26
	1.26	0	0	0.05	0.01	0.01	0	0.13	0	0.13	0.08	0.07	0.1	0.05	0.03	0.05	0.06	0.03	0.29	0.01	0.02	0.04	0	0	0.09	0	0.13	0.02	0	0.09	0.03	0.07	0.11	0.15	0.11	0.34	0.08	0.03	0.1	0.13	0.16	0	0.17	0.37	0.02	0.04	0.01	0.22	0.19
	1.27	0	0	0.1	0.01	0	0.02	0.13	0	0.1	0.08	0.01	0.08	0.06	0.05	0.04	0.06	0.02	0.35	0	0.02	0.13	0	0	0.08	0.02	0.09	0.04	0	0.15	0.03	0.08	0.15	0.14	0.1	0.45	0.08	0.02	0.19	0.06	0.12	0.01	0.1	0.29	0.12	0.05	0.01	0.24	0.28
	1.28	0	0	0.07	0.02	0.02	0.04	0.17	0	0.17	0.03	0.02	0.03	0.04	0.1	0.03	0.04	0.04	0.29	0.01	0.04	0.09	0	0	0.08	0.01	0.12	0.01	0.01	0.13	0.05	0.13	0.17	0.1	0.07	0.29	0.1	0.01	0.16	0.07	0.21	0	0.07	0.29	0.06	0.08	0	0.28	0.29
	1.29	0	0	0.02	0.02	0	0.01	0.13	0	0.13	0.04	0.11	0.09	0.04	0.02	0.05	0.05	0.03	0.39	0	0	0.15	0.01	0	0.08	0.05	0.14	0.02	0.01	0.13	0.04	0.13	0.14	0.08	0.08	0.29	0.09	0.03	0.09	0.16	0.2	0.01	0.14	0.32	0.07	0.04	0.01	0.22	0.2
	1.3	0	0	0.08	0.02	0	0.01	0.13	0	0.1	0.05	0.05	0.06	0.04	0.08	0.07	0.04	0.08	0.33	0.01	0.04	0.16	0	0	0.06	0.02	0.14	0.02	0.03	0.1	0.05	0.14	0.23	0.1	0.09	0.33	0.1	0.03	0.17	0.11	0.21	0	0.1	0.31	0.08	0.04	0.02	0.21	0.21
	1.31	0	0	0.03	0.01	0.01	0.02	0.12	0	0.19	0.08	0.06	0.08	0.05	0.05	0.05	0.05	0.08	0.36	0	0.02	0.12	0	0.02	0.04	0.05	0.16	0.02	0.02	0.09	0.04	0.11	0.15	0.18	0.06	0.24	0.07	0.05	0.16	0.08	0.21	0	0.14	0.28	0.12	0.04	0.01	0.2	0.14
	1.32	0	0	0.09	0.02	0.01	0.01	0.19	0	0.12	0.06	0.05	0.12	0.04	0.06	0.05	0.06	0.03	0.33	0.01	0.04	0.12	0	0.02	0.07	0.06	0.1	0.02	0.03	0.13	0.01	0.11	0.1	0.11	0.08	0.3	0.14	0.05	0.08	0.13	0.15	0.02	0.15	0.3	0.06	0.05	0.01	0.16	0.18
	1.33	0	0	0.05	0.01	0	0.02	0.13	0	0.18	0.13	0.02	0.13	0	0.06	0.09	0.07	0.06	0.34	0.01	0.03	0.13	0.01	0	0.09	0.03	0.15	0.01	0.02	0.14	0.03	0.18	0.15	0.06	0.06	0.27	0.09	0.05	0.2	0.09	0.25	0.01	0.17	0.24	0.09	0.09	0.01	0.26	0.19
	1.34	0	0	0.04	0.02	0	0	0.15	0	0.2	0.04	0.07	0.09	0.06	0.04	0.06	0.04	0.08	0.43	0	0.02	0.1	0	0	0.1	0.07	0.17	0	0.02	0.13	0.06	0.09	0.07	0.17	0.08	0.36	0.08	0.05	0.12	0.08	0.17	0	0.15	0.28	0.09	0.05	0.01	0.18	0.22
	1.35	0	0	0.1	0.02	0	0.04	0.11	0.01	0.16	0.05	0.04	0.14	0.03	0.05	0.09	0.07	0.03	0.33	0.02	0	0.13	0	0.02	0.13	0.04	0.11	0.01	0.01	0.15	0.07	0.12	0.14	0.14	0.06	0.25	0.11	0.03	0.14	0.09	0.19	0.03	0.13	0.29	0.07	0.05	0.02	0.21	0.14
	1.36	0	0	0.06	0.02	0.01	0.01	0.13	0	0.19	0.09	0.08	0.1	0.03	0.06	0.07	0.05	0.08	0.23	0	0.05	0.14	0.02	0.03	0.1	0.07	0.11	0.02	0.02	0.11	0.06	0.14	0.22	0.1	0.08	0.22	0.1	0.07	0.09	0.05	0.21	0.01	0.13	0.26	0.06	0.04	0	0.22	0.17
	1.37	0	0	0.06	0	0.02	0.02	0.13	0	0.12	0.14	0.06	0.14	0.09	0.06	0.03	0.06	0.06	0.34	0.01	0.02	0.15	0.02	0.01	0.09	0.1	0.2	0.02	0.03	0.05	0.04	0.14	0.19	0.1	0.08	0.36	0.09	0.04	0.23	0.09	0.15	0.01	0.15	0.33	0.11	0.06	0	0.19	0.18
	1.38	0	0	0.02	0	0.01	0.02	0.14	0	0.14	0.15	0.05	0.07	0.05	0.05	0.15	0.03	0.08	0.24	0.01	0.02	0.11	0	0.03	0.09	0.12	0.16	0.02	0.04	0.13	0.05	0.13	0.16	0.09	0.07	0.24	0.09	0.05	0.15	0.08	0.19	0.03	0.12	0.41	0.09	0.07	0.01	0.21	0.15
	1.39	0	0	0.05	0.02	0.01	0.03	0.1	0	0.14	0.07	0.07	0.12	0.05	0.05	0.08	0.07	0.05	0.29	0	0	0.15	0.01	0	0.09	0.11	0.18	0.02	0.02	0.1	0.03	0.08	0.22	0.11	0.06	0.26	0.11	0.06	0.13	0.1	0.2	0.03	0.08	0.43	0.1	0.03	0.01	0.27	0.23
	1.4	0	0	0.07	0	0.01	0.03	0.18	0	0.1	0.14	0.09	0.1	0.04	0.06	0.09	0.03	0.05	0.31	0	0.06	0.08	0	0	0.1	0.14	0.13	0.03	0.01	0.1	0.03	0.14	0.15	0.09	0.14	0.35	0.06	0.04	0.16	0.15	0.18	0.04	0.1	0.42	0.09	0.04	0.02	0.18	0.23
	1.41	0	0	0.04	0.01	0.03	0.02	0.13	0.01	0.12	0.18	0.07	0.08	0.04	0.03	0.06	0.05	0.1	0.27	0.01	0.03	0.08	0.02	0.03	0.07	0.12	0.15	0	0.05	0.16	0.03	0.09	0.12	0.17	0.04	0.28	0.15	0.02	0.14	0.1	0.16	0.01	0.09	0.41	0.16	0.05	0.04	0.24	0.22
	1.42	0	0	0.02	0.03	0.01	0.01	0.08	0	0.07	0.09	0.11	0.08	0.16	0.07	0.09	0.02	0.06	0.26	0.01	0.03	0.11	0	0.01	0.1	0.09	0.1	0.02	0.01	0.09	0.05	0.1	0.17	0.12	0.08	0.25	0.09	0.06	0.23	0.06	0.23	0.01	0.1	0.41	0.1	0.08	0	0.16	0.23
	1.43	0.01	0	0.06	0.02	0.02	0.02	0.13	0	0.17	0.13	0.08	0.08	0.16	0.01	0.09	0.03	0.04	0.28	0	0.04	0.07	0.02	0.03	0.09	0.13	0.14	0.02	0.07	0.07	0.04	0.14	0.16	0.12	0.06	0.3	0.12	0.05	0.21	0.09	0.16	0.05	0.14	0.46	0.13	0.06	0.04	0.3	0.18
	1.44	0	0	0.03	0.02	0.02	0.03	0.12	0	0.16	0.17	0.06	0.12	0.07	0.05	0.12	0.03	0.07	0.3	0	0.08	0.09	0.01	0.01	0.12	0.11	0.18	0.05	0.03	0.1	0.04	0.11	0.2	0.07	0.07	0.33	0.08	0.06	0.08	0.07	0.19	0.03	0.14	0.3	0.13	0.07	0	0.17	0.15
	1.45	0	0	0.07	0.02	0	0.05	0.17	0	0.17	0.11	0.07	0.17	0.06	0.11	0.06	0.05	0.06	0.34	0	0.03	0.11	0	0.03	0.05	0.11	0.16	0.01	0.01	0.09	0.04	0.15	0.16	0.11	0.06	0.33	0.06	0.05	0.17	0.13	0.19	0.03	0.05	0.31	0.12	0.06	0.03	0.2	0.22
	1.46	0	0	0	0.01	0.02	0.05	0.11	0.01	0.19	0.11	0.12	0.07	0.08	0.04	0.08	0.03	0.04	0.24	0	0.08	0.11	0.02	0	0.1	0.21	0.13	0.06	0.06	0.07	0.06	0.07	0.12	0.08	0.09	0.32	0.1	0.02	0.17	0.07	0.17	0.01	0.11	0.46	0.16	0.04	0.02	0.18	0.19
	1.47	0	0	0.04	0	0.02	0.01	0.16	0.01	0.17	0.15	0.12	0.15	0.07	0.06	0.05	0.05	0.1	0.22	0.01	0.05	0.12	0.03	0.02	0.08	0.12	0.12	0.01	0.04	0.07	0.05	0.16	0.19	0.09	0.08	0.28	0.09	0.04	0.13	0.05	0.19	0.03	0.12	0.31	0.13	0.07	0.03	0.16	0.22
	1.48	0	0	0.03	0	0.02	0.03	0.14	0	0.06	0.14	0.04	0.1	0.08	0.1	0.05	0.04	0.07	0.31	0.01	0.03	0.1	0.01	0	0.05	0.13	0.15	0.02	0.03	0.06	0.03	0.18	0.15	0.14	0.11	0.23	0.12	0.03	0.12	0.09	0.23	0.05	0.09	0.35	0.12	0.07	0.01	0.23	0.19
	1.49	0	0	0.04	0	0	0.01	0.14	0	0.16	0.11	0.1	0.13	0.05	0.03	0.09	0.02	0.07	0.27	0.02	0.04	0.14	0.01	0.02	0.06	0.15	0.2	0.02	0.05	0.12	0.04	0.09	0.15	0.15	0.03	0.33	0.1	0.03	0.16	0.09	0.25	0.01	0.12	0.35	0.08	0.06	0.03	0.22	0.18
	1.5	0	0	0.08	0.02	0.03	0.05	0.12	0	0.11	0.12	0.03	0.07	0.06	0.06	0.11	0.02	0.05	0.22	0.01	0.06	0.13	0.01	0.06	0.08	0.1	0.13	0.05	0.08	0.1	0.03	0.1	0.2	0.18	0.05	0.27	0.13	0.06	0.16	0.13	0.14	0.01	0.11	0.31	0.09	0.03	0.01	0.24	0.18
[truncated: 118 more columns]
